# Supplementary material for: Organocatalytic regioselective asymmetric Michael addition of azlactones to o-hydroxy chalcone derivatives
Source: Royal Society of Chemistry journal article supplement (doi:10.1039/c5ob00121h), 2015-01-01
Supplement: c5ob00121h1.pdf [file c5ob00121h1.pdf]

# **Organocatalytic Regioselective Asymmetric Michael Addition of Azlactones to *o*-Hydroxy Chalcone Derivatives**

Shao-Yun Zhang, Gui-Yu Ruan, Zhi-Cong Geng, Nai-Kai Li, Ming Lv, Yong  
Wang\* and Xing-Wang Wang\*

*Key Laboratory of Organic Synthesis of Jiangsu Province, College of Chemistry,  
Chemical Engineering and Materials Science, Soochow University, Suzhou 215123, P.  
R. China.*

Fax: +86-512-65880378

E-mail: wangxw@suda.edu.cn, yowang@suda.edu.cn

|                                                                        |           |
|------------------------------------------------------------------------|-----------|
| <b>1: The Relative Configuration Determination</b>                     | <b>2</b>  |
| <b>2: Datas of TS-aa and TS-bb</b>                                     | <b>4</b>  |
| <b>3: Copies of <sup>1</sup>H NMR and <sup>13</sup>C NMR Spectrums</b> | <b>10</b> |
| <b>4: HPLC spectra</b>                                                 | <b>39</b> |

## 1: The Relative Configuration Determination:

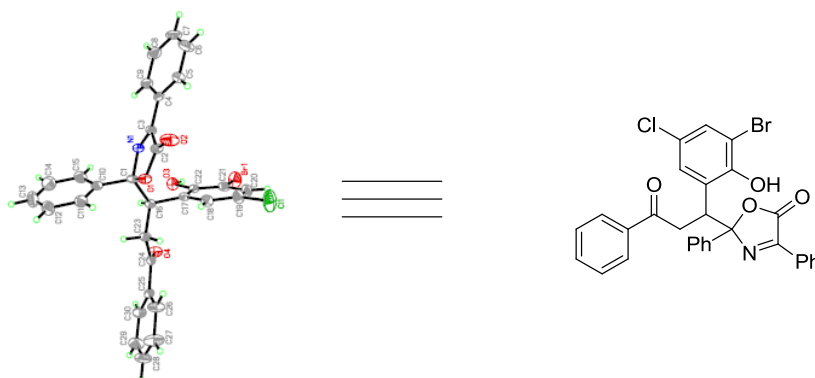

**Figure S4. X-ray structure of compound *rac*-5a.**

X-ray data of racemic *rac*-5a

|                                 |                                                     |                         |
|---------------------------------|-----------------------------------------------------|-------------------------|
| Empirical formula               | C <sub>30</sub> H <sub>21</sub> BrClNO <sub>4</sub> |                         |
| Formula weight                  | 574.84                                              |                         |
| Temperature                     | 192(2) K                                            |                         |
| Wavelength                      | 0.71073 Å                                           |                         |
| Crystal system, space group     | Triclinic, P -1                                     |                         |
| Unit cell dimensions            | a = 9.2824(5) Å                                     | alpha = 109.870(3) deg. |
|                                 | b = 10.8659(6) Å                                    | beta = 103.464(2) deg.  |
|                                 | c = 14.2839(7) Å                                    | gamma = 98.966(3) deg.  |
| Volume                          | 1273.46(12) Å <sup>3</sup>                          |                         |
| Z, Calculated density           | 2, 1.499 Mg/m <sup>3</sup>                          |                         |
| Absorption coefficient          | 1.757 mm <sup>-1</sup>                              |                         |
| F(000)                          | 584                                                 |                         |
| Crystal size                    | 0.50 x 0.20 x 0.08 mm                               |                         |
| Theta range for data collection | 2.33 to 25.50 deg.                                  |                         |
| Limiting indices                | -11<=h<=11, -13<=k<=13, -17<=l<=17                  |                         |
| Reflections collected / unique  | 41502 / 4739 [R(int) = 0.1021]                      |                         |
| Completeness to theta = 25.50   | 99.9 %                                              |                         |
| Absorption correction           | Semi-empirical from equivalents                     |                         |
| Max. and min. transmission      | 0.8722 and 0.4737                                   |                         |

|                                      |                                       |
|--------------------------------------|---------------------------------------|
| Refinement method                    | Full-matrix least-squares on $F^2$    |
| Data / restraints / parameters       | 4739 / 0 / 338                        |
| Goodness-of-fit on $F^2$             | 1.031                                 |
| Final R indices [ $I > 2\sigma(I)$ ] | R1 = 0.0460, wR2 = 0.1069             |
| R indices (all data)                 | R1 = 0.0717, wR2 = 0.1150             |
| Largest diff. peak and hole          | 0.783 and -0.578 e. $\text{\AA}^{-3}$ |

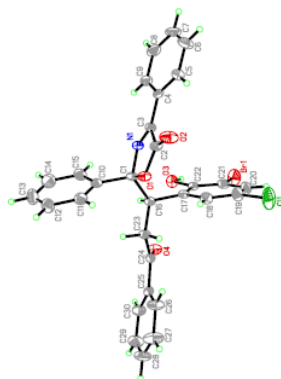

**Figure S5. ORTEP drawing of *rac-5a***

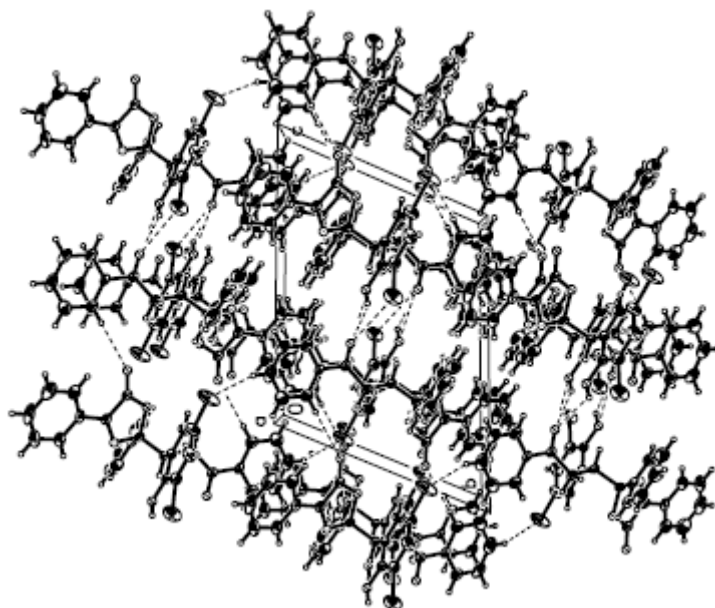

**Figure S6. Packing of molecules in a unit cell for *rac-5a***

The crystal was prepared from the solvent  $\text{CDCl}_3$ . CCDC 1032990 contains the supplementary crystallographic data for this paper. These data can be obtained free of charge from The Cambridge Crystallographic Data Centre via [www.ccdc.cam.ac.uk/services/structure\\_deposit/](http://www.ccdc.cam.ac.uk/services/structure_deposit/).

## 2. Datas of TS-aa and TS-bb

### TS-aa (1S, 2R):

|   |   |           |           |               |    |
|---|---|-----------|-----------|---------------|----|
| C | 0 | 4.704734  | -5.408210 | 3.152034 L    |    |
| C | 0 | 3.585392  | -5.099818 | 3.886776 L    |    |
| C | 0 | 2.570510  | -4.260299 | 3.367964 L    |    |
| C | 0 | 2.719539  | -3.737109 | 2.036640 L    |    |
| C | 0 | 3.893028  | -4.049804 | 1.311431 L    |    |
| C | 0 | 4.868413  | -4.870767 | 1.850324 L    |    |
| N | 0 | 1.490473  | -3.978750 | 4.167059 L H  | 12 |
| C | 0 | 0.547476  | -3.186127 | 3.676783 L H  | 91 |
| C | 0 | 0.582776  | -2.648098 | 2.367182 L H  | 12 |
| C | 0 | 1.648978  | -2.922396 | 1.535707 L    |    |
| C | 0 | 1.647646  | -2.380581 | 0.100984 L H  | 12 |
| N | 0 | 1.560762  | -0.920646 | 0.060914 H    |    |
| C | 0 | 2.536272  | -0.117651 | -0.465653 H   |    |
| S | 0 | 4.086092  | -0.681318 | -0.833942 H   |    |
| C | 0 | 0.459716  | -3.028450 | -0.656750 L H | 20 |
| C | 0 | 0.693763  | -4.549279 | -0.878265 L H | 20 |
| C | 0 | 0.472842  | -4.892324 | -2.364721 L H | 20 |
| C | 0 | -0.955548 | -4.453116 | -2.800571 L   |    |
| C | 0 | -1.048777 | -2.909467 | -2.637267 L H | 20 |
| N | 0 | 0.237211  | -2.366810 | -2.023404 H   |    |
| C | 0 | 1.392491  | -2.602624 | -2.969444 L H | 20 |
| C | 0 | 1.522432  | -4.135081 | -3.216979 L   |    |
| N | 0 | 2.068332  | 1.156164  | -0.663600 H   |    |
| C | 0 | 2.714228  | 2.391494  | -0.831586 H   |    |
| C | 0 | 4.071879  | 2.567058  | -1.139468 H   |    |
| C | 0 | 4.588404  | 3.858717  | -1.248639 H   |    |
| C | 0 | 3.792913  | 4.987791  | -1.057665 H   |    |
| C | 0 | 2.443265  | 4.802937  | -0.760967 H   |    |
| C | 0 | 1.902933  | 3.524336  | -0.657356 H   |    |
| C | 0 | 6.030506  | 4.038810  | -1.651001 H   |    |
| F | 0 | 6.549656  | 5.180901  | -1.145883 H   |    |
| C | 0 | 1.555843  | 5.981933  | -0.471887 H   |    |
| F | 0 | 0.351886  | 5.874762  | -1.065814 H   |    |
| F | 0 | 6.806433  | 3.018892  | -1.233015 H   |    |
| F | 0 | 6.160901  | 4.111109  | -2.996679 H   |    |
| F | 0 | 1.303605  | 6.095469  | 0.874384 H    |    |
| F | 0 | 2.104771  | 7.149025  | -0.852286 H   |    |
| H | 0 | 1.714552  | -4.819016 | -0.587212 L   |    |
| H | 0 | 2.584981  | -2.641412 | -0.386493 L   |    |
| H | 0 | 2.527332  | -4.470095 | -2.940797 L H | 20 |
| H | 0 | 0.575926  | -5.970444 | -2.516592 L   |    |

|   |   |           |           |           |     |    |
|---|---|-----------|-----------|-----------|-----|----|
| H | 0 | 0.006230  | -5.121429 | -0.251008 | L   |    |
| H | 0 | 1.370085  | -4.358859 | -4.278001 | L H | 20 |
| H | 0 | 2.290300  | -2.167446 | -2.525159 | L H | 20 |
| H | 0 | -0.480651 | -2.844471 | -0.131221 | L   |    |
| C | 0 | -2.037131 | -5.151446 | -1.995246 | L   |    |
| H | 0 | 0.623358  | -0.527109 | 0.126132  | H   |    |
| H | 0 | -1.074444 | -4.712954 | -3.859390 | L   |    |
| H | 0 | 1.154413  | -2.057918 | -3.886015 | L   |    |
| H | 0 | 1.048466  | 1.217094  | -0.661935 | H   |    |
| H | 0 | -1.844983 | -2.623187 | -1.949923 | L   |    |
| H | 0 | -1.179028 | -2.389665 | -3.586918 | L   |    |
| H | 0 | -0.293248 | -2.955620 | 4.322591  | L   |    |
| H | 0 | -0.244898 | -2.031506 | 2.037339  | L   |    |
| H | 0 | 4.708048  | 1.704968  | -1.279762 | H   |    |
| H | 0 | 4.214057  | 5.981746  | -1.133523 | H   |    |
| H | 0 | 0.856784  | 3.403885  | -0.394920 | H   |    |
| H | 0 | 4.100501  | -3.610186 | 0.345915  | L   |    |
| O | 0 | 5.971721  | -5.109284 | 1.049799  | L   |    |
| H | 0 | 3.440991  | -5.481620 | 4.889062  | L   |    |
| H | 0 | 5.463391  | -6.051178 | 3.576722  | L   |    |
| C | 0 | -2.666104 | -6.252426 | -2.402134 | L   |    |
| C | 0 | 7.077078  | -5.891556 | 1.596064  | L   |    |
| H | 0 | 7.827070  | -5.902698 | 0.805003  | L   |    |
| H | 0 | 7.497999  | -5.425812 | 2.494929  | L   |    |
| H | 0 | 6.773039  | -6.919471 | 1.827813  | L   |    |
| H | 0 | 0.060042  | -1.338967 | -1.866165 | H   |    |
| H | 0 | -2.451389 | -6.714609 | -3.362631 | L   |    |
| H | 0 | -3.423801 | -6.734473 | -1.793383 | L   |    |
| H | 0 | -2.291605 | -4.687213 | -1.043980 | L   |    |
| C | 0 | -3.119003 | -0.375028 | -5.566088 | H   |    |
| C | 0 | -1.786645 | -0.027667 | -5.324887 | H   |    |
| C | 0 | -4.027646 | -0.406569 | -4.506552 | H   |    |
| C | 0 | -1.367633 | 0.274148  | -4.029979 | H   |    |
| H | 0 | -1.077920 | 0.015909  | -6.147345 | H   |    |
| C | 0 | -3.613285 | -0.089936 | -3.212757 | H   |    |
| H | 0 | -5.062040 | -0.685663 | -4.684188 | H   |    |
| C | 0 | -2.276034 | 0.251581  | -2.957535 | H   |    |
| H | 0 | -0.335878 | 0.550257  | -3.833720 | H   |    |
| H | 0 | -4.323197 | -0.138680 | -2.393905 | H   |    |
| C | 0 | -1.777044 | 0.571432  | -1.581638 | H   |    |
| C | 0 | -2.600841 | 1.325420  | -0.731658 | H   |    |
| O | 0 | -0.577776 | 0.193230  | -1.296434 | H   |    |
| C | 0 | -2.188432 | 1.836190  | 0.524467  | H   |    |
| H | 0 | -1.137393 | 1.698082  | 0.755418  | H   |    |

|   |   |           |           |             |
|---|---|-----------|-----------|-------------|
| C | 0 | -2.746776 | 3.121970  | 1.005340 H  |
| C | 0 | -2.747468 | 0.407523  | 1.965466 H  |
| C | 0 | -4.119970 | 3.409688  | 0.977493 H  |
| C | 0 | -1.874430 | 4.136225  | 1.452501 H  |
| N | 0 | -4.070737 | 0.264678  | 1.708680 H  |
| O | 0 | -2.040360 | -0.700366 | 1.438939 H  |
| C | 0 | -2.244226 | 0.932536  | 3.251045 H  |
| C | 0 | -4.616681 | 4.649517  | 1.371385 H  |
| H | 0 | -4.803851 | 2.629047  | 0.661752 H  |
| C | 0 | -2.365055 | 5.385652  | 1.842017 H  |
| O | 0 | -0.533161 | 3.859793  | 1.467421 H  |
| C | 0 | -4.216433 | -0.742456 | 0.861210 H  |
| C | 0 | -2.927569 | -1.406479 | 0.667599 H  |
| C | 0 | -0.899511 | 0.788208  | 3.627258 H  |
| C | 0 | -3.118905 | 1.624903  | 4.103904 H  |
| C | 0 | -3.733282 | 5.641766  | 1.801367 H  |
| H | 0 | -1.667659 | 6.154889  | 2.165221 H  |
| C | 0 | -5.503801 | -1.131105 | 0.278008 H  |
| O | 0 | -2.570254 | -2.411403 | 0.043650 H  |
| C | 0 | -0.446367 | 1.311609  | 4.836841 H  |
| H | 0 | -0.204008 | 0.264399  | 2.980521 H  |
| C | 0 | -2.657151 | 2.152988  | 5.307000 H  |
| H | 0 | -4.157192 | 1.734606  | 3.813909 H  |
| H | 0 | -4.105546 | 6.615006  | 2.107236 H  |
| C | 0 | -6.660656 | -0.396406 | 0.602832 H  |
| C | 0 | -5.621551 | -2.225138 | -0.599446 H |
| C | 0 | -1.321117 | 1.996556  | 5.681676 H  |
| H | 0 | 0.594906  | 1.182684  | 5.117463 H  |
| H | 0 | -3.346864 | 2.682649  | 5.957877 H  |
| C | 0 | -7.894225 | -0.742824 | 0.062656 H  |
| H | 0 | -6.571660 | 0.439212  | 1.288557 H  |
| C | 0 | -6.862562 | -2.563988 | -1.138322 H |
| H | 0 | -4.741772 | -2.806364 | -0.847855 H |
| H | 0 | -0.965150 | 2.403257  | 6.623653 H  |
| C | 0 | -8.002134 | -1.827607 | -0.812956 H |
| H | 0 | -8.776815 | -0.166607 | 0.325632 H  |
| H | 0 | -6.937583 | -3.412090 | -1.813170 H |
| H | 0 | -8.966687 | -2.096946 | -1.233329 H |
| H | 0 | -3.551995 | 1.652916  | -1.134611 H |
| H | 0 | -3.446012 | -0.616658 | -6.573176 H |
| H | 0 | -5.684859 | 4.840398  | 1.344743 H  |
| H | 0 | -0.035104 | 4.665910  | 1.663809 H  |

**TS-bb (1R, 2S):**

|   |   |          |          |             |
|---|---|----------|----------|-------------|
| C | 0 | 1.917788 | 6.925867 | -2.609242 L |
|---|---|----------|----------|-------------|

|   |   |           |           |               |    |
|---|---|-----------|-----------|---------------|----|
| C | 0 | 0.930209  | 6.265368  | -3.299072 L   |    |
| C | 0 | 0.370917  | 5.059332  | -2.812952 L   |    |
| C | 0 | 0.848562  | 4.530057  | -1.563701 L   |    |
| C | 0 | 1.879481  | 5.219348  | -0.883306 L   |    |
| C | 0 | 2.406716  | 6.396081  | -1.388380 L   |    |
| N | 0 | -0.603063 | 4.448653  | -3.562981 L H | 12 |
| C | 0 | -1.115482 | 3.314253  | -3.107251 L H | 87 |
| C | 0 | -0.732131 | 2.723401  | -1.878358 L H | 12 |
| C | 0 | 0.231095  | 3.321928  | -1.092158 L   |    |
| C | 0 | 0.583599  | 2.715562  | 0.273486 L H  | 12 |
| N | 0 | 1.062309  | 1.339308  | 0.152398 H    |    |
| C | 0 | 2.366519  | 0.973216  | 0.334939 H    |    |
| S | 0 | 3.527095  | 1.984451  | 1.044815 H    |    |
| C | 0 | -0.681634 | 2.799001  | 1.168265 L H  | 20 |
| C | 0 | -1.099450 | 4.270062  | 1.457105 L H  | 20 |
| C | 0 | -0.926493 | 4.564890  | 2.962783 L H  | 20 |
| C | 0 | -1.942838 | 3.693702  | 3.766060 L    |    |
| C | 0 | -1.733822 | 2.221444  | 3.337206 L H  | 20 |
| N | 0 | -0.468202 | 2.096872  | 2.506242 H    |    |
| C | 0 | 0.702227  | 2.655398  | 3.279720 L H  | 20 |
| C | 0 | 0.511053  | 4.193767  | 3.401058 L H  | 20 |
| N | 0 | 2.584196  | -0.314448 | -0.069868 H   |    |
| C | 0 | 3.750707  | -1.102339 | -0.062079 H   |    |
| C | 0 | 3.572484  | -2.489264 | 0.035518 H    |    |
| C | 0 | 4.670645  | -3.345733 | -0.038429 H   |    |
| C | 0 | 5.960138  | -2.839273 | -0.186449 H   |    |
| C | 0 | 6.130342  | -1.457093 | -0.272034 H   |    |
| C | 0 | 5.043792  | -0.585735 | -0.224484 H   |    |
| C | 0 | 4.441229  | -4.833074 | -0.011259 H   |    |
| F | 0 | 3.498406  | -5.183578 | 0.892634 H    |    |
| C | 0 | 7.523556  | -0.891229 | -0.378171 H   |    |
| F | 0 | 7.538197  | 0.302118  | -1.007326 H   |    |
| F | 0 | 4.010525  | -5.290324 | -1.216038 H   |    |
| F | 0 | 5.564094  | -5.516929 | 0.287430 H    |    |
| F | 0 | 8.075590  | -0.703599 | 0.842431 H    |    |
| F | 0 | 8.347894  | -1.720758 | -1.057279 H   |    |
| H | 0 | -0.476398 | 4.949855  | 0.869572 L H  | 20 |
| H | 0 | 1.396490  | 3.278662  | 0.726711 L    |    |
| H | 0 | 1.235371  | 4.713847  | 2.765210 L    |    |
| H | 0 | -1.115970 | 5.624835  | 3.158012 L    |    |
| H | 0 | -2.142095 | 4.431090  | 1.170680 L    |    |
| H | 0 | 0.682987  | 4.507862  | 4.435456 L    |    |
| H | 0 | 1.625301  | 2.389863  | 2.759859 L H  | 20 |
| H | 0 | -1.477904 | 2.213718  | 0.703244 L    |    |

|   |   |           |           |             |
|---|---|-----------|-----------|-------------|
| C | 0 | -3.357149 | 4.211366  | 3.584641 L  |
| H | 0 | 0.460029  | 0.675850  | -0.344331 H |
| H | 0 | -1.688362 | 3.795881  | 4.830561 L  |
| H | 0 | 0.688023  | 2.164111  | 4.256271 L  |
| H | 0 | 1.751922  | -0.808391 | -0.388065 H |
| H | 0 | -2.526693 | 1.818057  | 2.712925 L  |
| H | 0 | -1.607861 | 1.554795  | 4.192740 L  |
| H | 0 | -1.878660 | 2.834298  | -3.710803 L |
| H | 0 | -1.214180 | 1.800044  | -1.579962 L |
| H | 0 | 2.576552  | -2.895055 | 0.183219 H  |
| H | 0 | 6.811772  | -3.505294 | -0.239623 H |
| H | 0 | 5.194524  | 0.479757  | -0.315679 H |
| H | 0 | 2.333687  | 4.826174  | 0.015766 L  |
| O | 0 | 3.408361  | 6.984046  | -0.638391 L |
| H | 0 | 0.547962  | 6.638856  | -4.240103 L |
| H | 0 | 2.326336  | 7.844017  | -3.008239 L |
| C | 0 | -4.391798 | 3.599736  | 3.010791 L  |
| C | 0 | 4.066632  | 8.179020  | -1.161358 L |
| H | 0 | 4.832150  | 8.419373  | -0.423587 L |
| H | 0 | 4.538252  | 7.988730  | -2.132448 L |
| H | 0 | 3.368303  | 9.019406  | -1.253824 L |
| H | 0 | -4.341052 | 2.595630  | 2.602988 L  |
| H | 0 | -5.356957 | 4.088884  | 2.935152 L  |
| H | 0 | -3.497979 | 5.216192  | 3.981770 L  |
| C | 0 | 1.531724  | -3.912864 | 3.295797 H  |
| C | 0 | 0.715240  | -4.387815 | 2.267393 H  |
| C | 0 | 1.317146  | -2.632819 | 3.811022 H  |
| C | 0 | -0.307406 | -3.590090 | 1.755739 H  |
| H | 0 | 0.885644  | -5.374736 | 1.849175 H  |
| C | 0 | 0.303520  | -1.832628 | 3.289387 H  |
| H | 0 | 1.943922  | -2.257405 | 4.614854 H  |
| C | 0 | -0.526615 | -2.295897 | 2.256800 H  |
| H | 0 | -0.916545 | -3.966308 | 0.942171 H  |
| H | 0 | 0.132903  | -0.839092 | 3.690988 H  |
| C | 0 | -1.589114 | -1.391862 | 1.706628 H  |
| C | 0 | -2.747015 | -1.956545 | 1.133203 H  |
| O | 0 | -1.413682 | -0.129001 | 1.809958 H  |
| C | 0 | -3.817412 | -1.153184 | 0.639739 H  |
| H | 0 | -3.699288 | -0.099908 | 0.889119 H  |
| C | 0 | -3.448976 | -0.869271 | -1.302517 H |
| C | 0 | -5.234491 | -1.598083 | 0.775417 H  |
| O | 0 | -2.186076 | -0.233603 | -1.208793 H |
| N | 0 | -3.261184 | -2.144098 | -1.771030 H |
| C | 0 | -4.527953 | -0.004573 | -1.838173 H |



|   |   |           |           |           |     |
|---|---|-----------|-----------|-----------|-----|
| C | 0 | -5.708005 | -2.872503 | 0.383213  | H   |
| C | 0 | -6.146107 | -0.727193 | 1.395673  | H   |
| C | 0 | -1.238424 | -1.210974 | -1.320886 | H   |
| C | 0 | -1.969328 | -2.425520 | -1.688570 | H   |
| C | 0 | -5.585144 | -0.569746 | -2.566133 | H   |
| C | 0 | -4.531507 | 1.377457  | -1.595143 | H   |
| C | 0 | -7.019311 | -3.259098 | 0.683428  | H   |
| O | 0 | -4.929451 | -3.771984 | -0.280004 | H   |
| C | 0 | -7.454515 | -1.105064 | 1.683383  | H   |
| H | 0 | -5.800027 | 0.263388  | 1.681395  | H   |
| O | 0 | -0.040053 | -0.949895 | -1.187804 | H   |
| C | 0 | -1.388832 | -3.738240 | -1.985581 | H   |
| C | 0 | -6.619020 | 0.232923  | -3.043287 | H   |
| H | 0 | -5.583416 | -1.635885 | -2.761852 | H   |
| C | 0 | -5.563576 | 2.177208  | -2.083397 | H   |
| H | 0 | -3.722768 | 1.831035  | -1.031182 | H   |
| C | 0 | -7.885201 | -2.387505 | 1.336916  | H   |
| H | 0 | -7.338116 | -4.249586 | 0.375281  | H   |
| C | 0 | -2.222381 | -4.820521 | -2.327813 | H   |
| C | 0 | 0.002086  | -3.947435 | -1.933331 | H   |
| C | 0 | -6.612282 | 1.608881  | -2.808119 | H   |
| H | 0 | -7.429156 | -0.219029 | -3.607899 | H   |
| H | 0 | -5.546242 | 3.247373  | -1.897852 | L H |
| H | 0 | -8.900448 | -2.703801 | 1.559044  | H   |
| C | 0 | -1.678006 | -6.071605 | -2.597368 | H   |
| H | 0 | -3.295416 | -4.674467 | -2.380307 | H   |
| C | 0 | 0.540653  | -5.205522 | -2.198143 | H   |
| H | 0 | 0.652990  | -3.117049 | -1.691763 | H   |
| H | 0 | -7.415664 | 2.233053  | -3.187713 | H   |
| C | 0 | -0.296022 | -6.271790 | -2.529539 | H   |
| H | 0 | -2.335311 | -6.895857 | -2.858049 | H   |
| H | 0 | 1.614612  | -5.349691 | -2.134396 | H   |
| H | 0 | 0.123988  | -7.251948 | -2.735123 | H   |
| H | 0 | -4.308140 | -3.283557 | -0.870531 | H   |
| H | 0 | -0.421560 | 1.059781  | 2.287644  | H   |
| H | 0 | -2.873804 | -3.030700 | 1.171868  | H   |
| H | 0 | -8.127083 | -0.410504 | 2.177037  | H   |
| H | 0 | 2.332612  | -4.533319 | 3.686088  | H   |

### 3. Copies of $^1\text{H}$ NMR and $^{13}\text{C}$ NMR Spectrums

(2R,3S)-methyl 2-benzamido-5-oxo-2,3,5-triphenylpentanoate A:

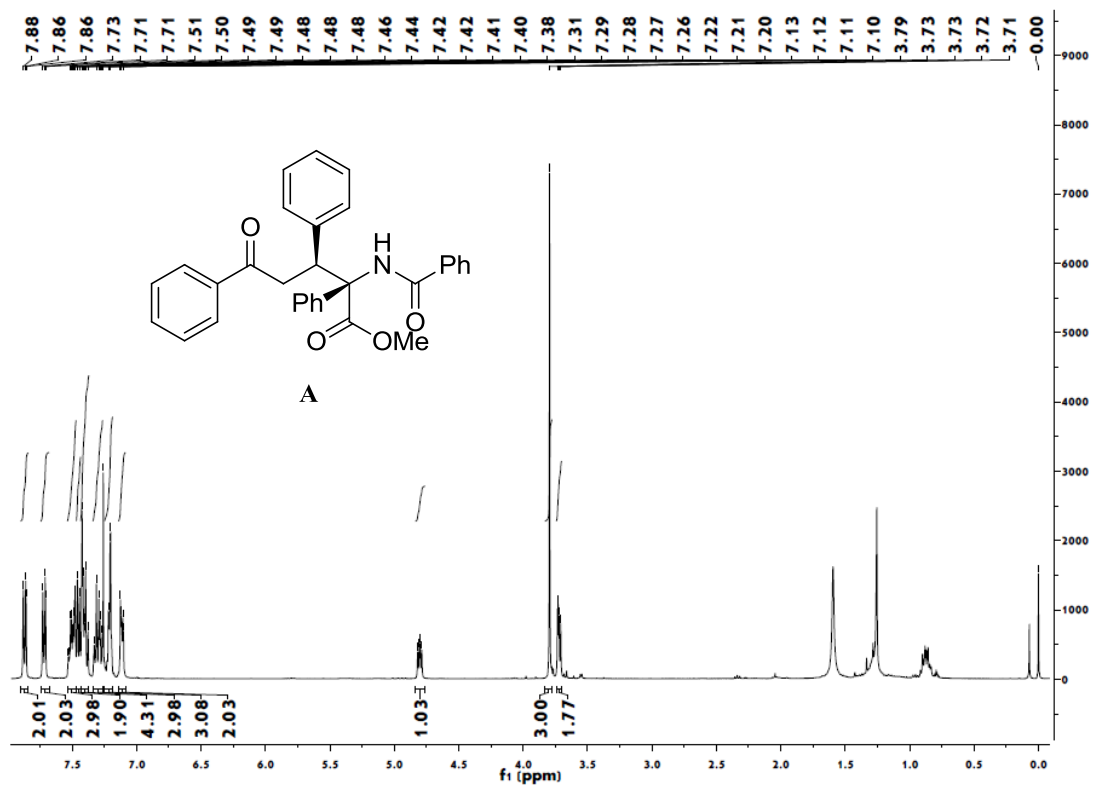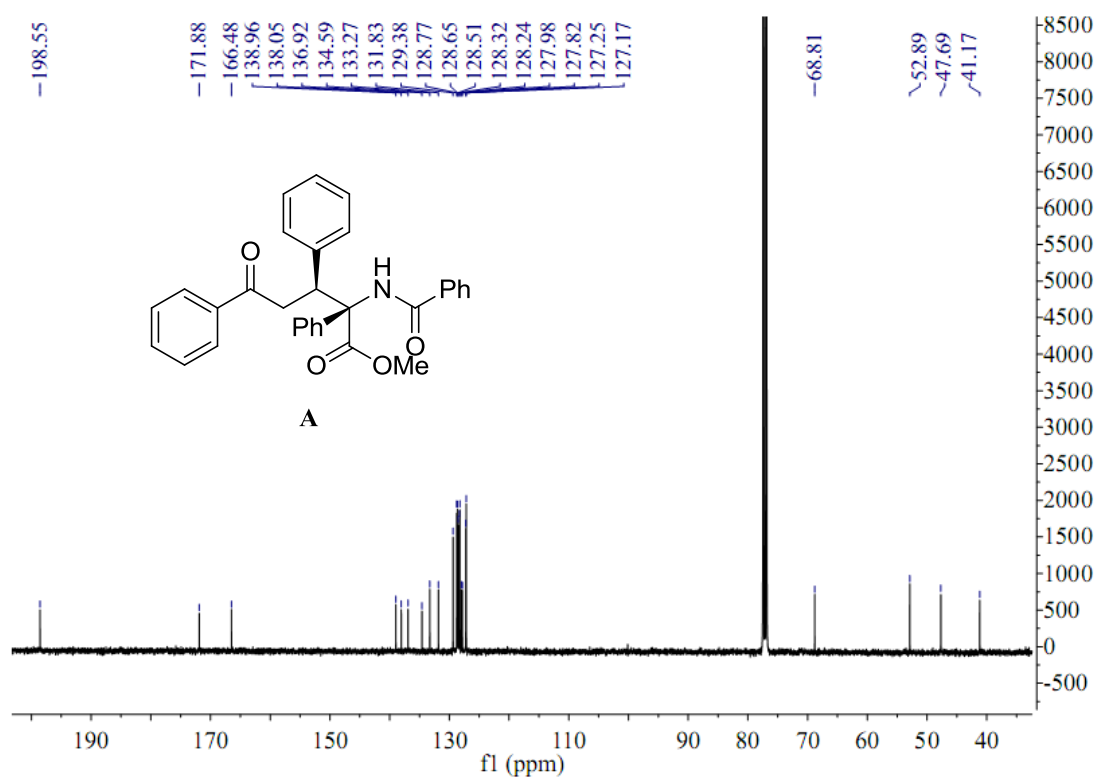

**(R)-2-((S)-3-oxo-1,3-diphenylpropyl)-2,4-diphenyloxazol-5(2H)-one B:**

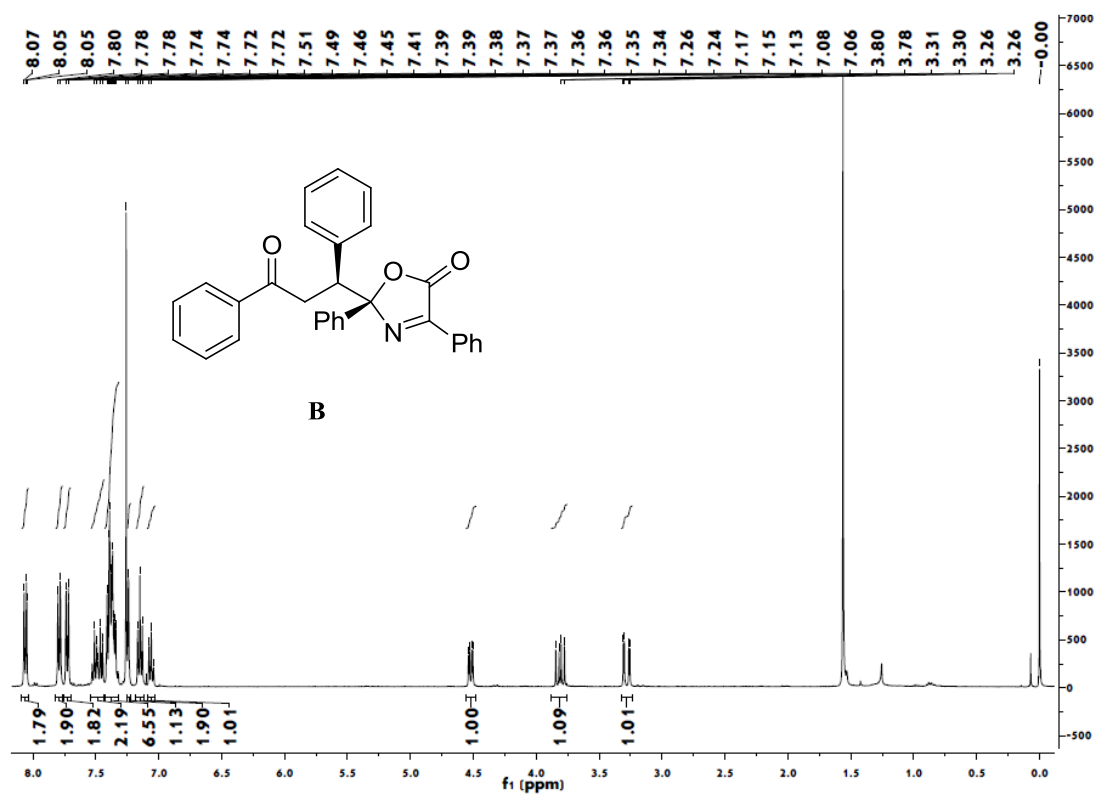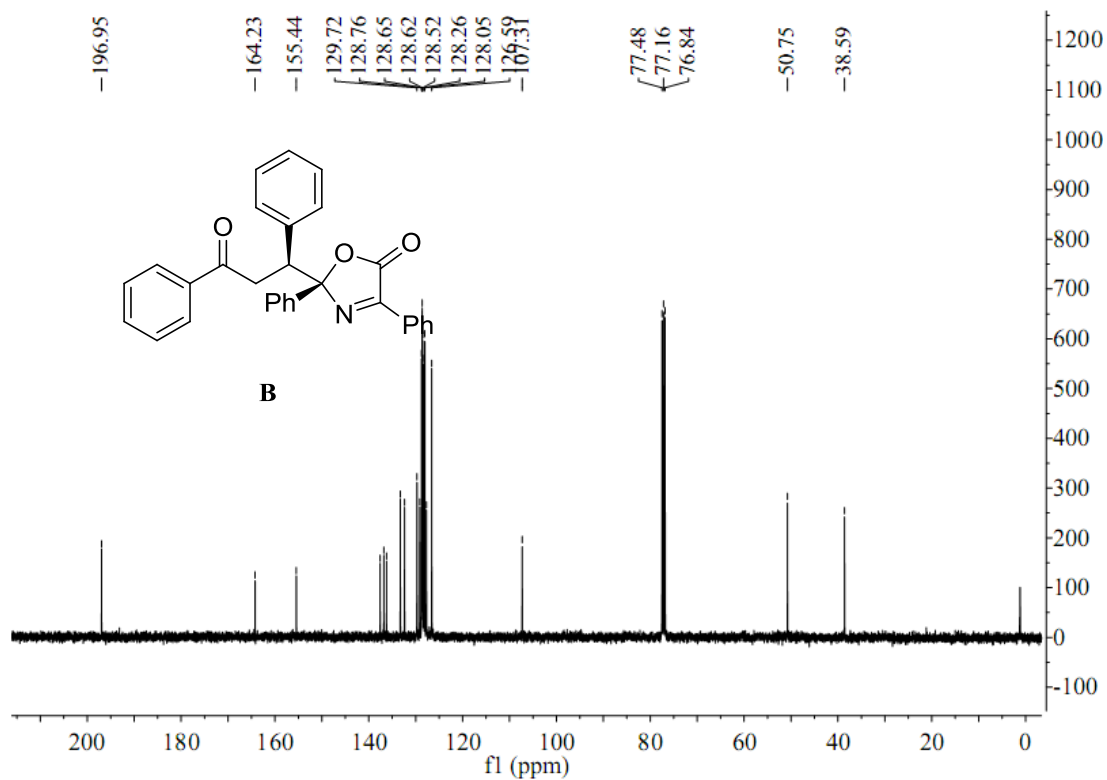

**(R)-2-((S)-1-(5-chloro-2-hydroxyphenyl)-3-oxo-3-phenylpropyl)-2,4-diphenyloxazol-5(2H)-one 4a:**

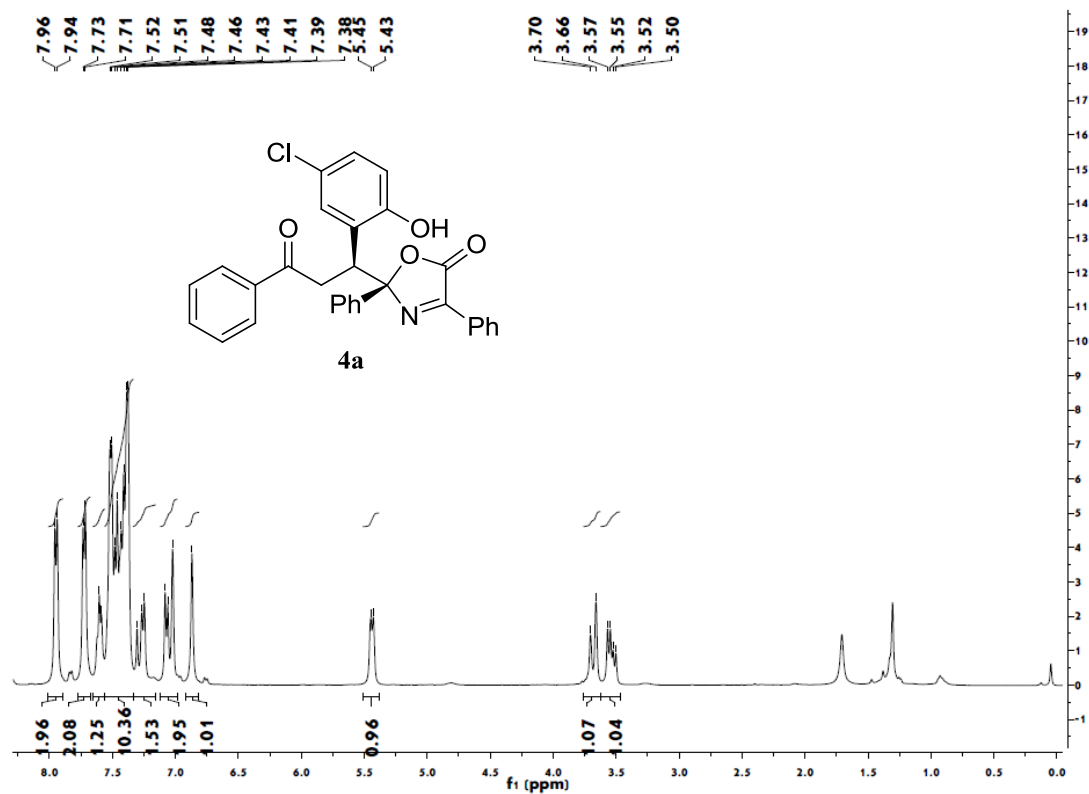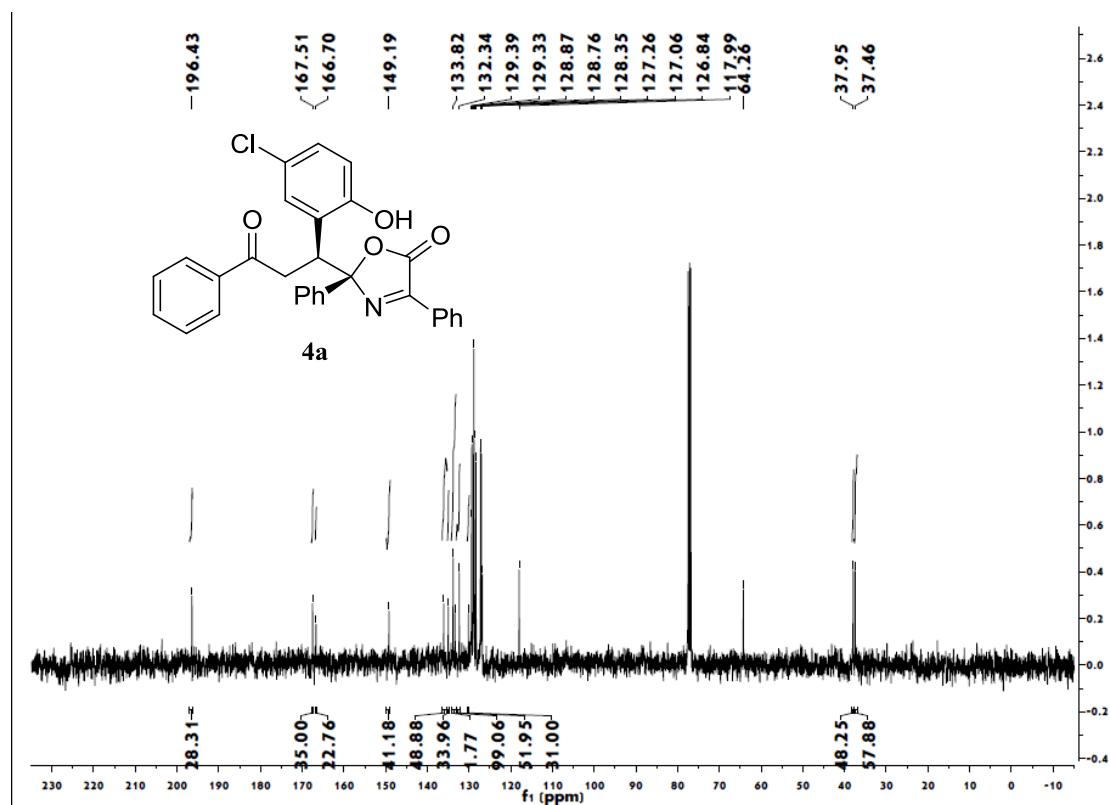

**(R)-2-((S)-1-(5-chloro-2-hydroxyphenyl)-3-(4-fluorophenyl)-3-oxopropyl)-2,4-diphenyloxazol-5(2H)-one 4b:**

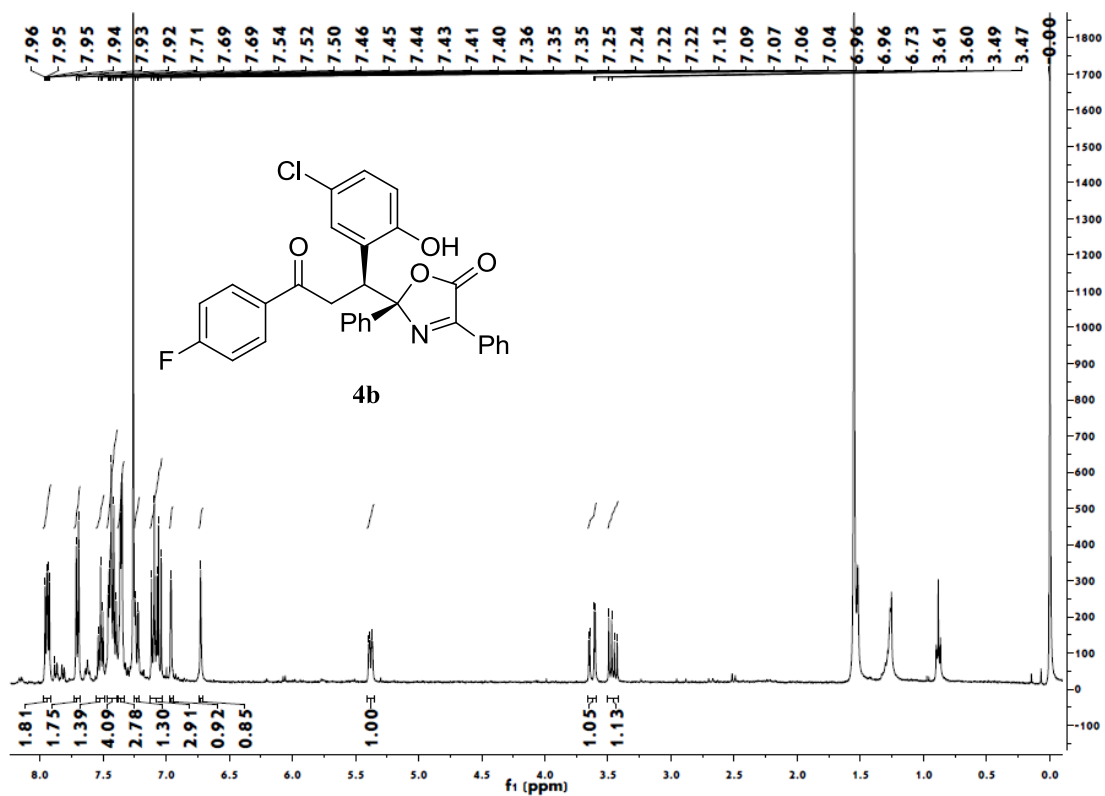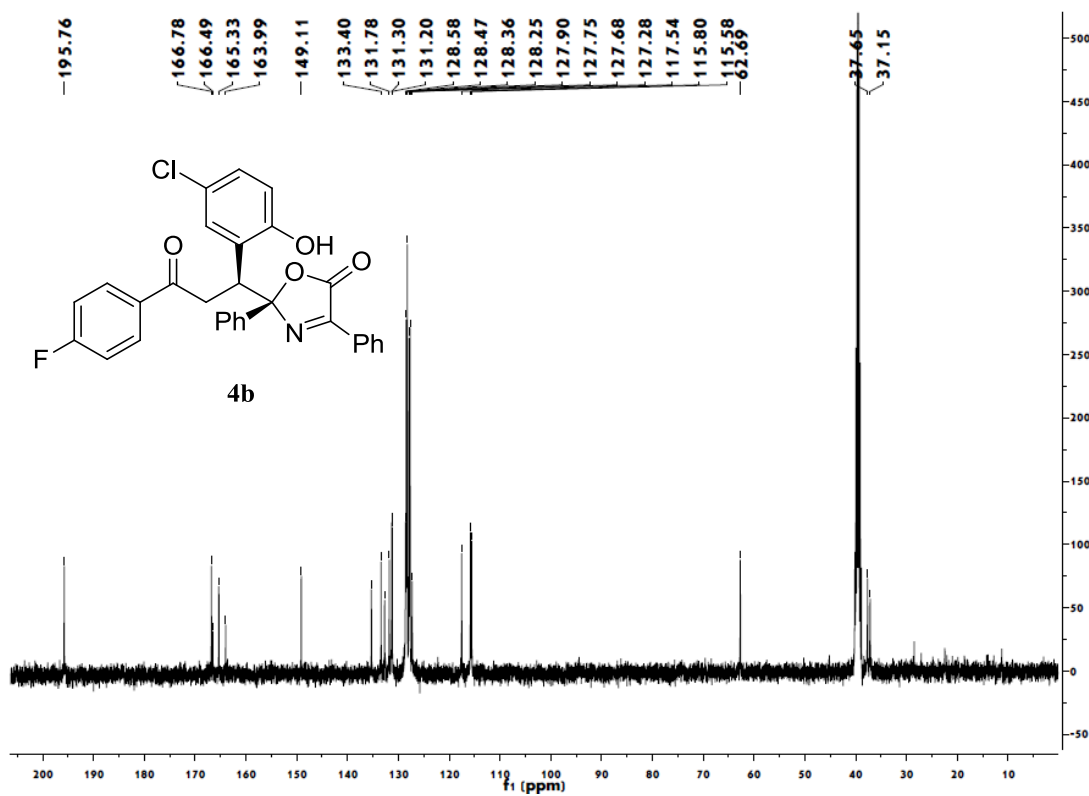

**(R)-2-((S)-3-(4-bromophenyl)-1-(5-chloro-2-hydroxyphenyl)-3-oxopropyl)-2,4-diphenyloxazolidin-5(2H)-one 4c:**

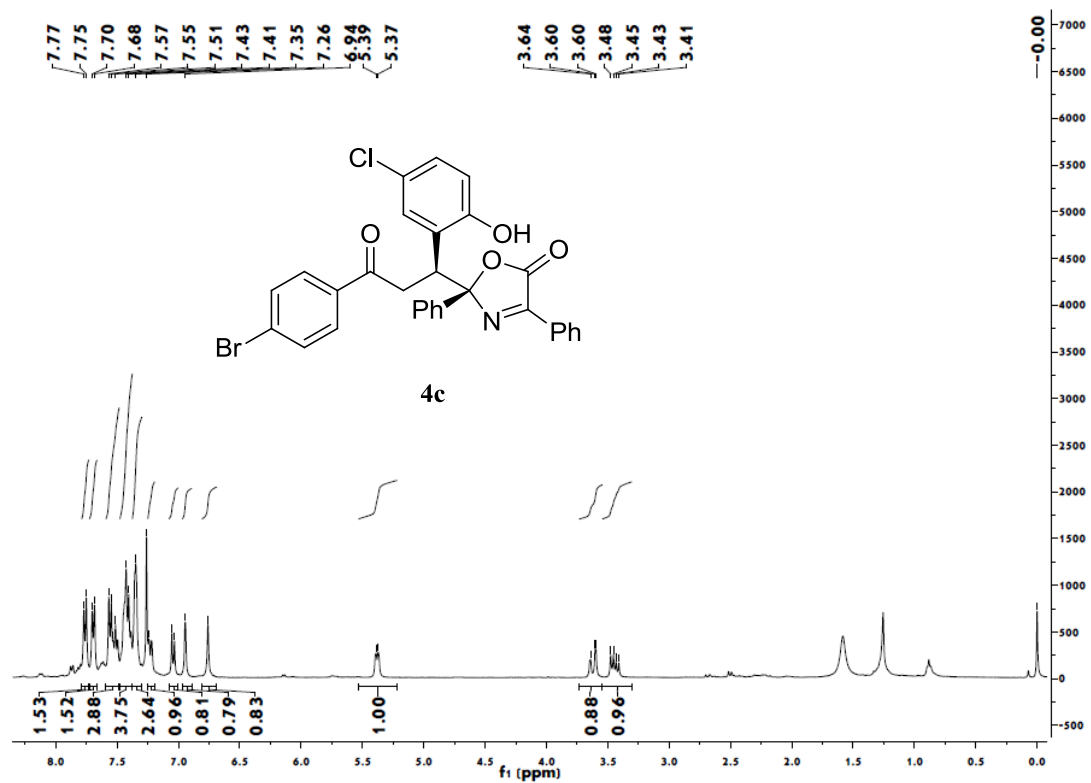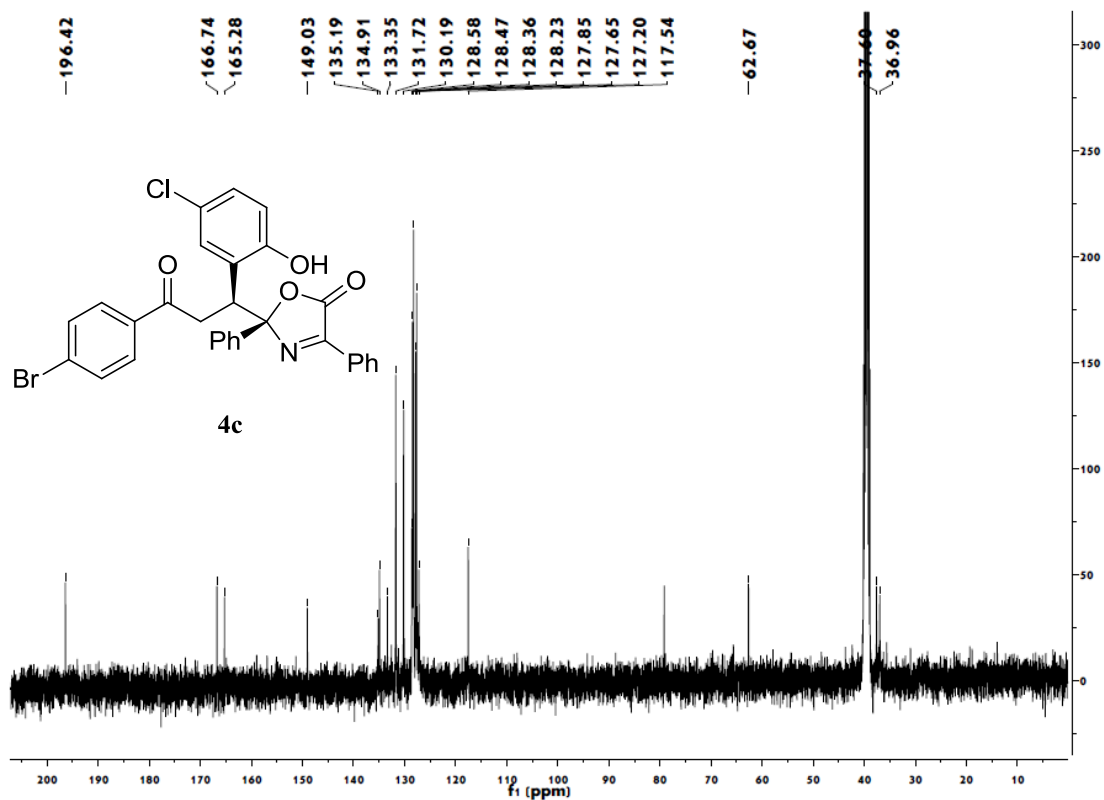

**(R)-2-((S)-1-(5-chloro-2-hydroxyphenyl)-3-(4-iodophenyl)-3-oxopropyl)-2,4-diphenyloxazol-5  
(2H)-one 4d:**

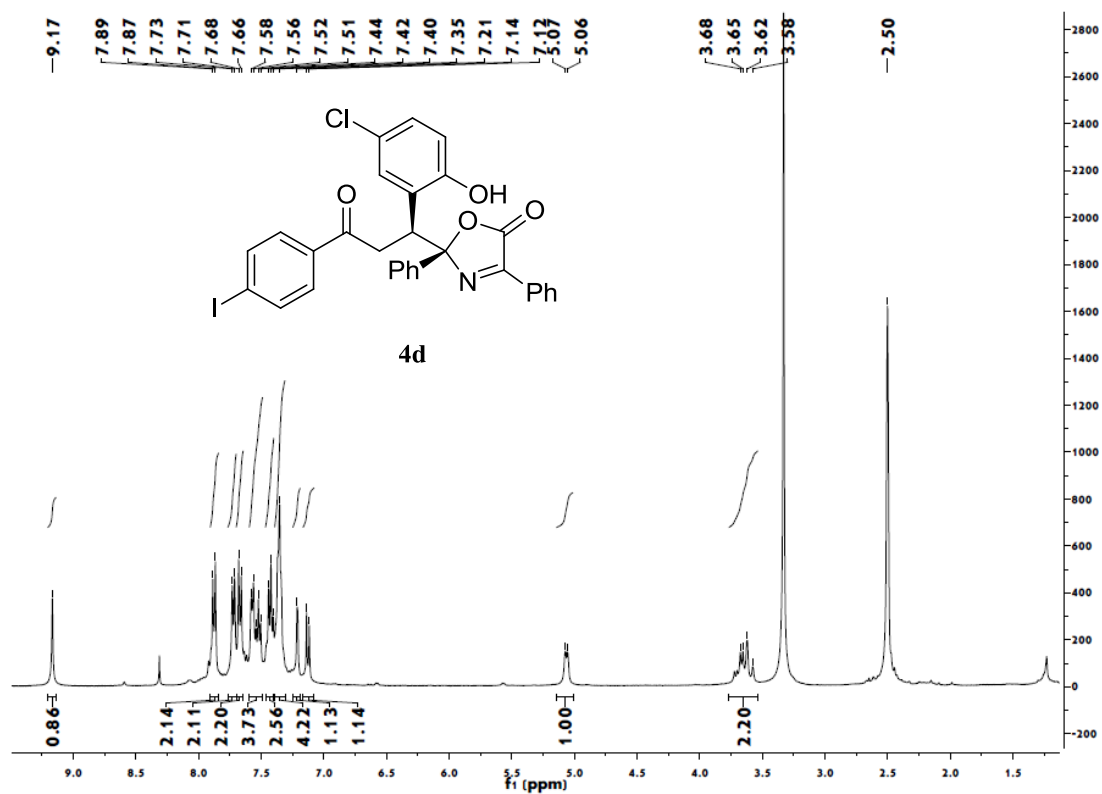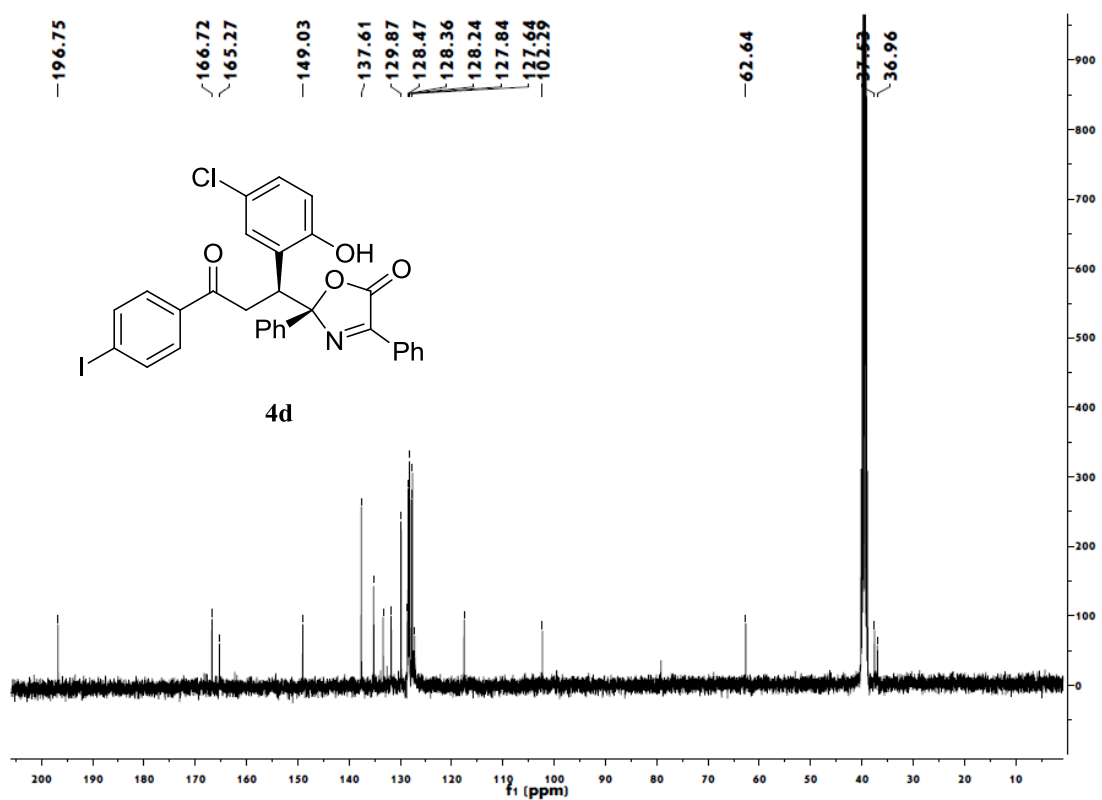

**(R)-2-((S)-1-(5-chloro-2-hydroxyphenyl)-3-oxo-3-(4-(trifluoromethyl)phenyl)propyl)-2,4-diphenyloxazol-5(2H)-one 4e:**

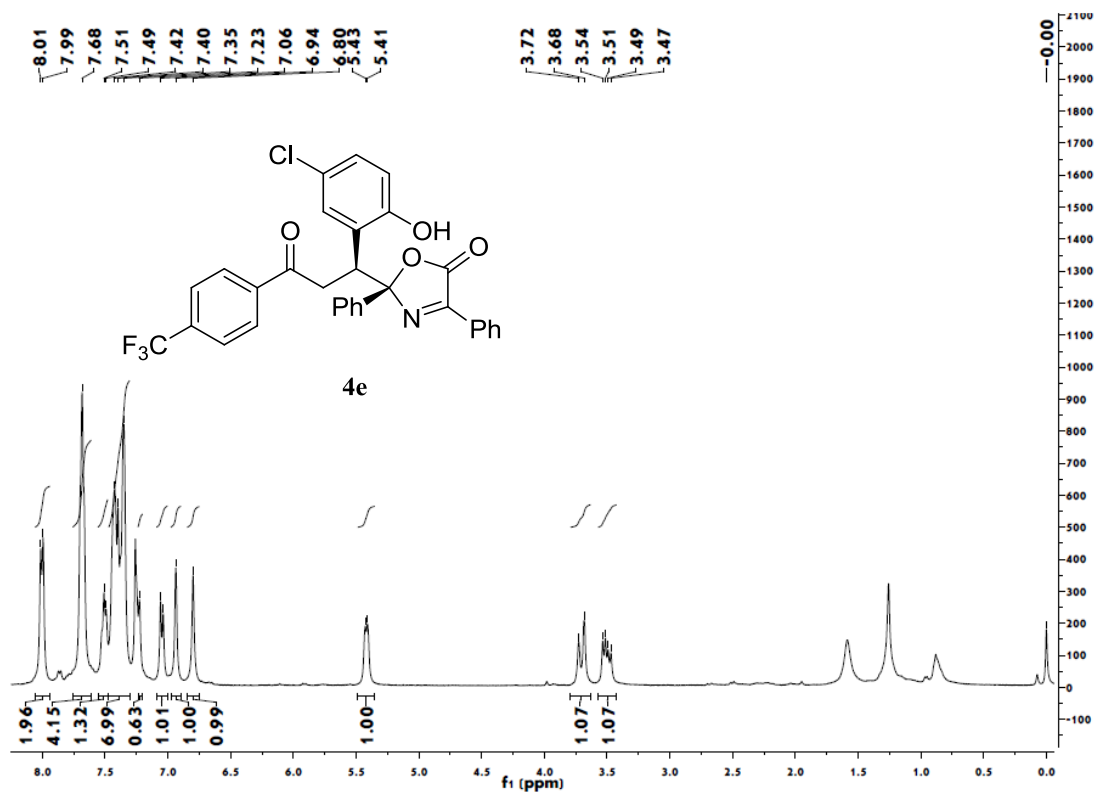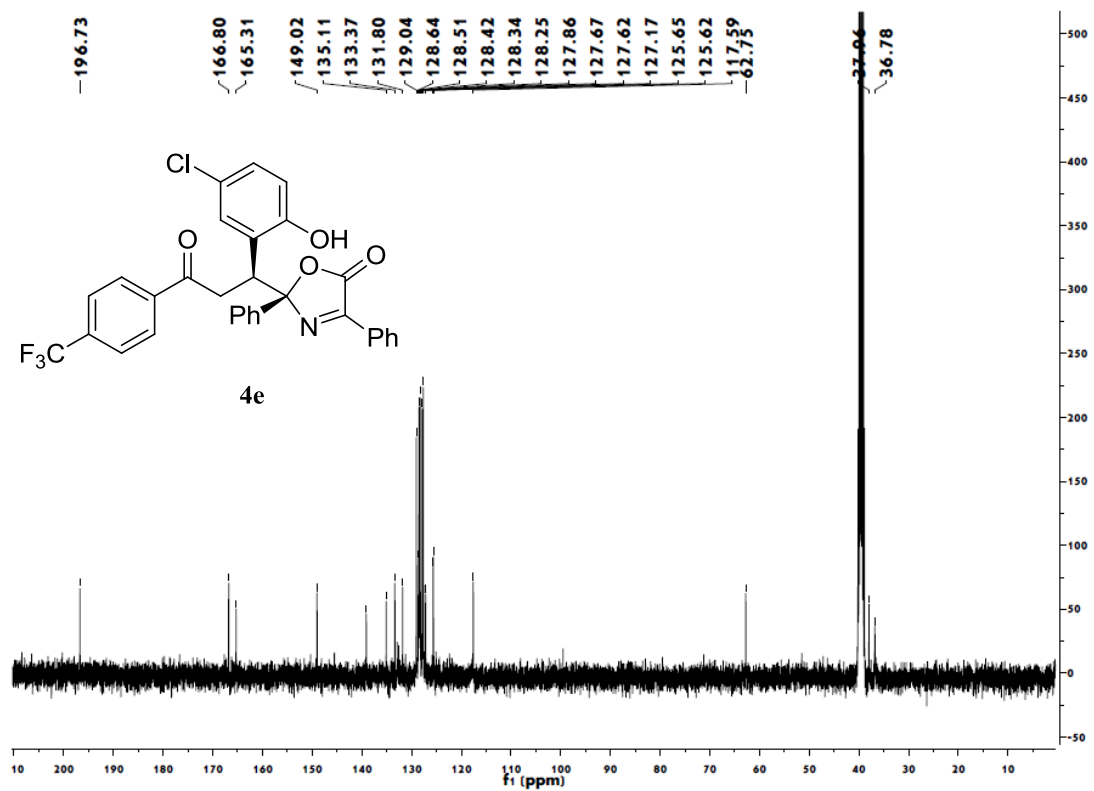



**(R)-2-((S)-3-(4-(tert-butyl)phenyl)-1-(5-chloro-2-hydroxyphenyl)-3-oxopropyl)-2,4-diphenylloxazol-5(2H)-one 4f:**

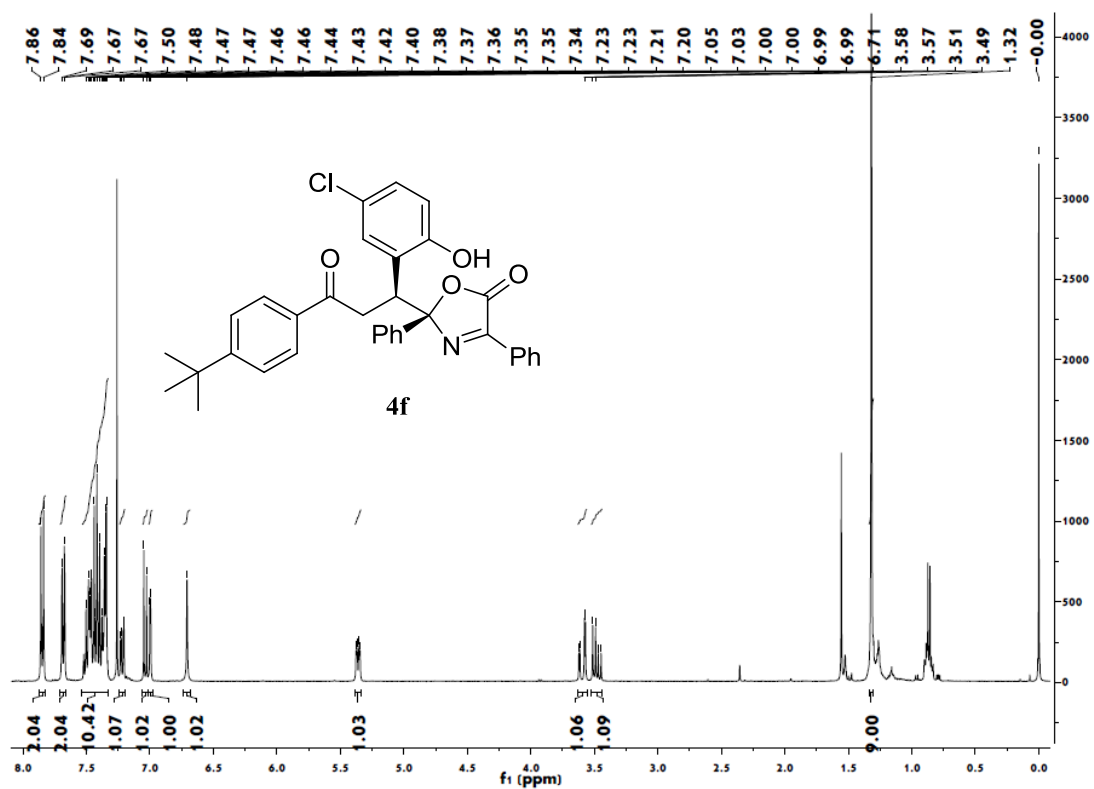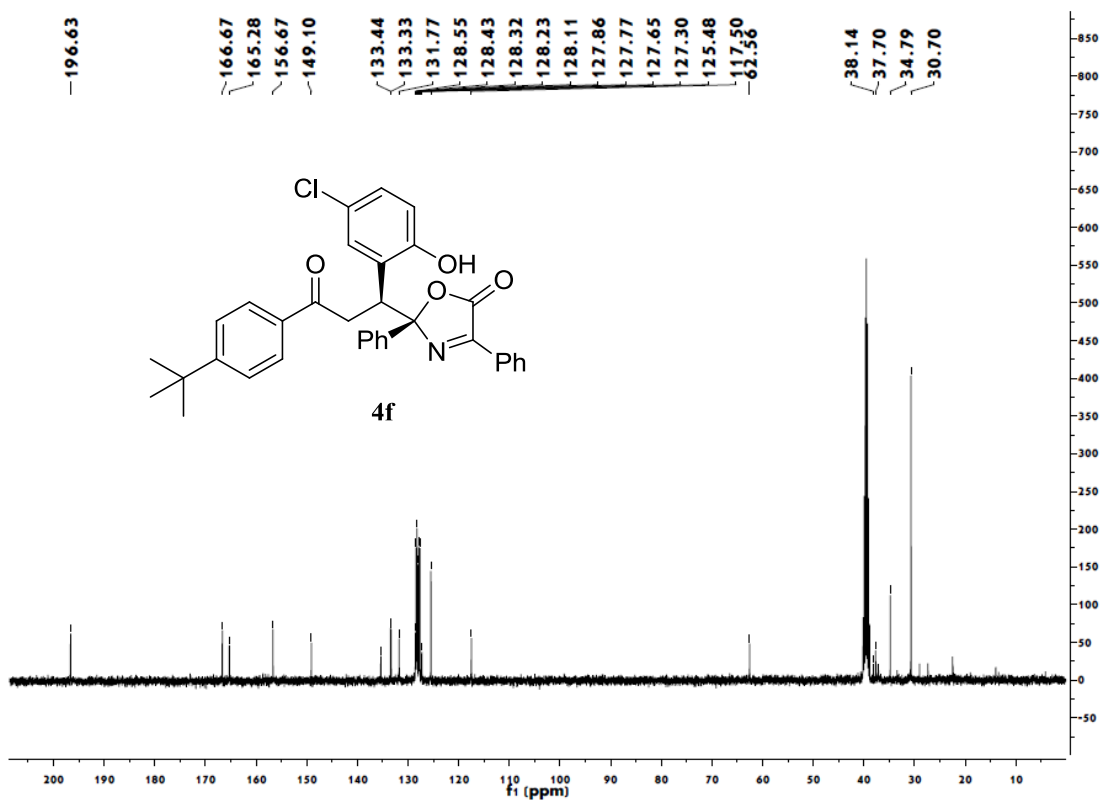

**(R)-2-((S)-3-([1,1'-biphenyl]-4-yl)-1-(5-chloro-2-hydroxyphenyl)-3-oxopropyl)-2,4-diphenylloxazol-5(2H)-one 4g:**

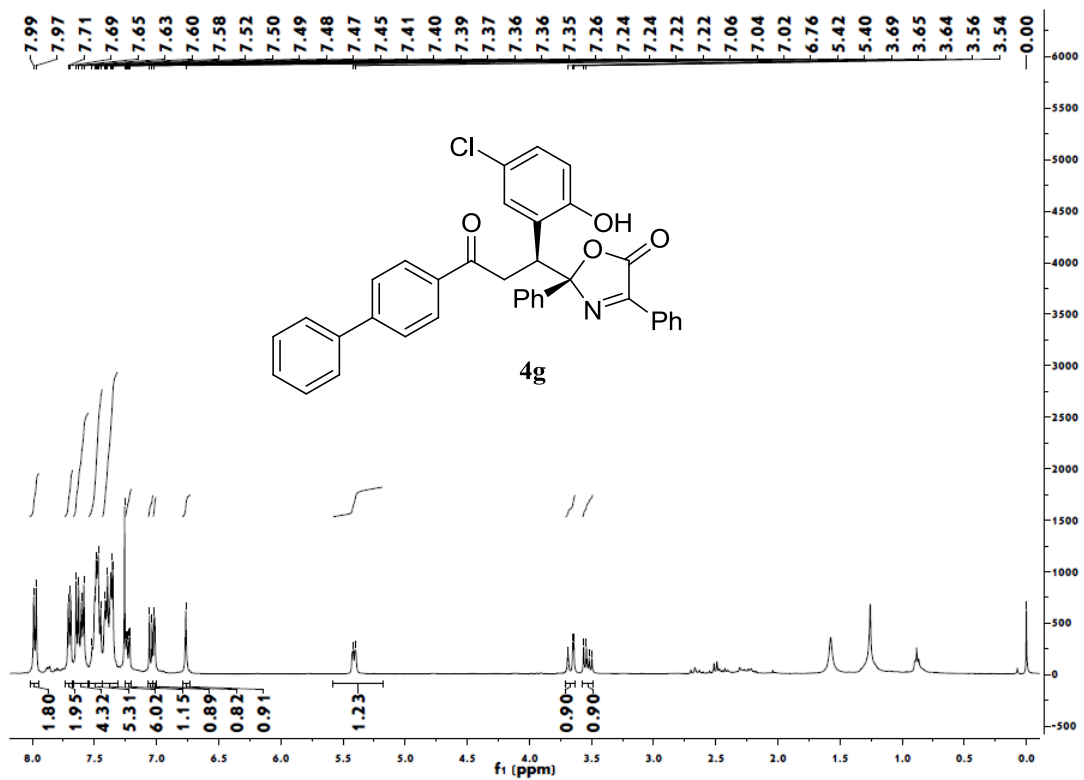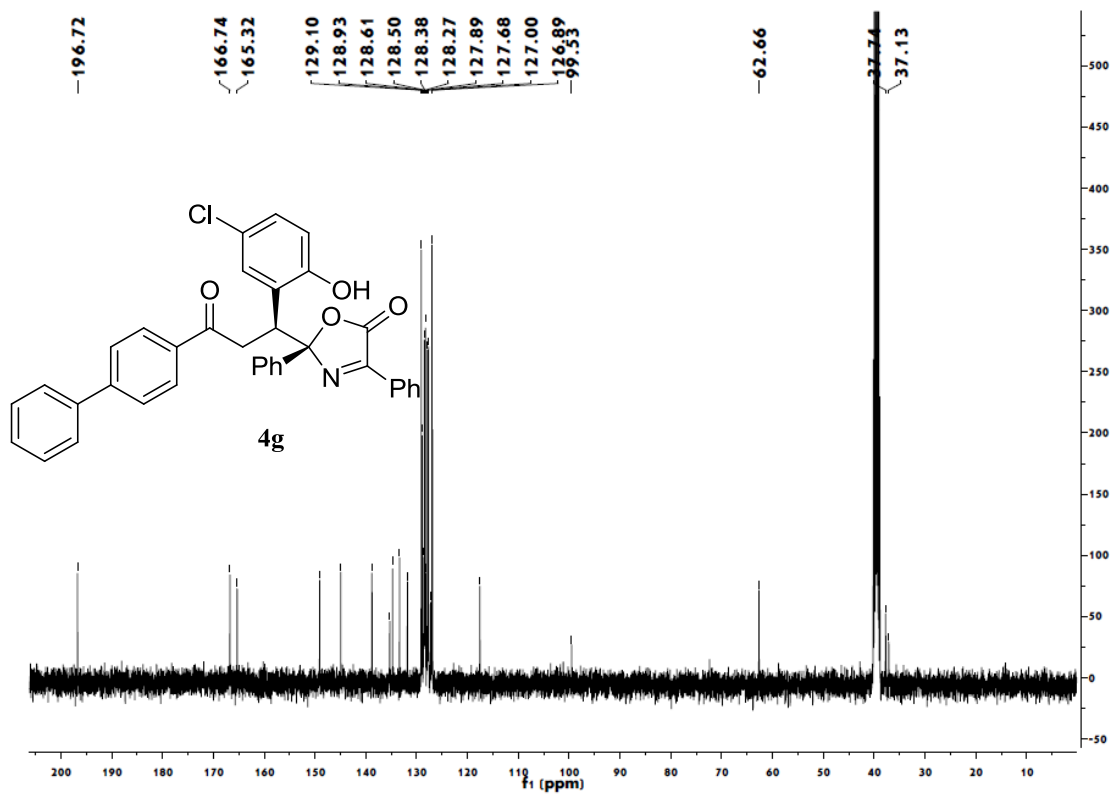

**(R)-2-((S)-1-(5-chloro-2-hydroxyphenyl)-3-oxo-3-(4-pentylphenyl)propyl)-2,4-diphenyloxazol-5(2H)-one 4h:**

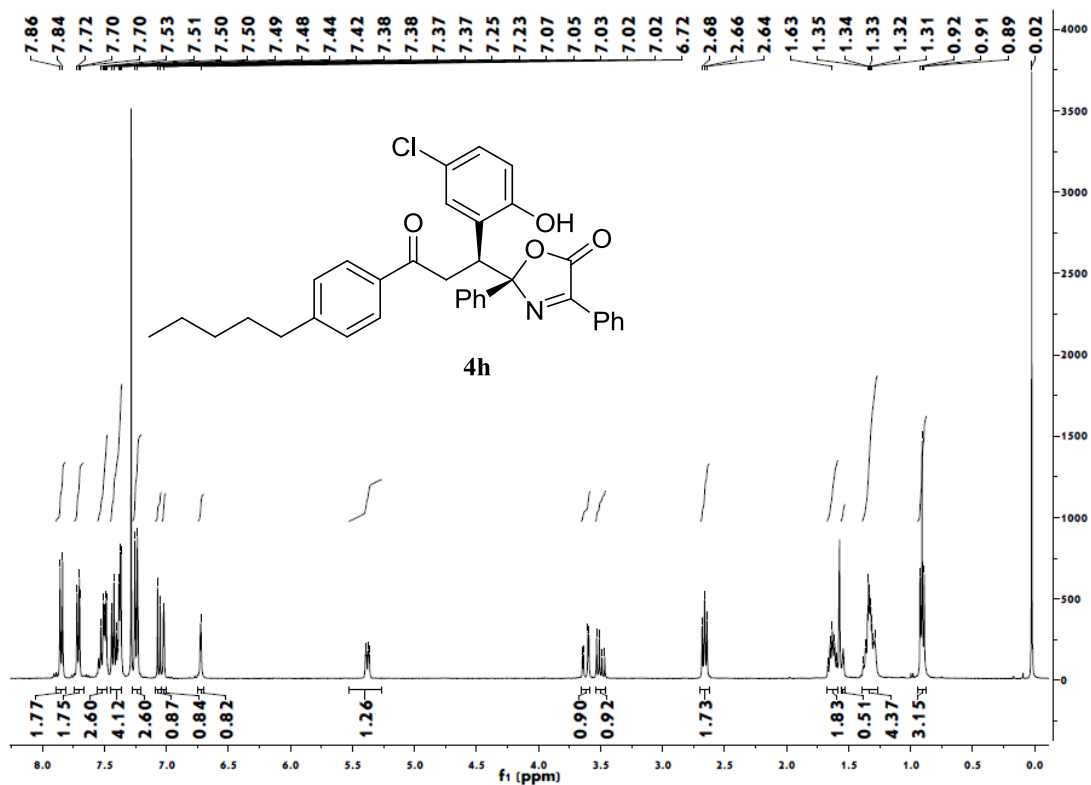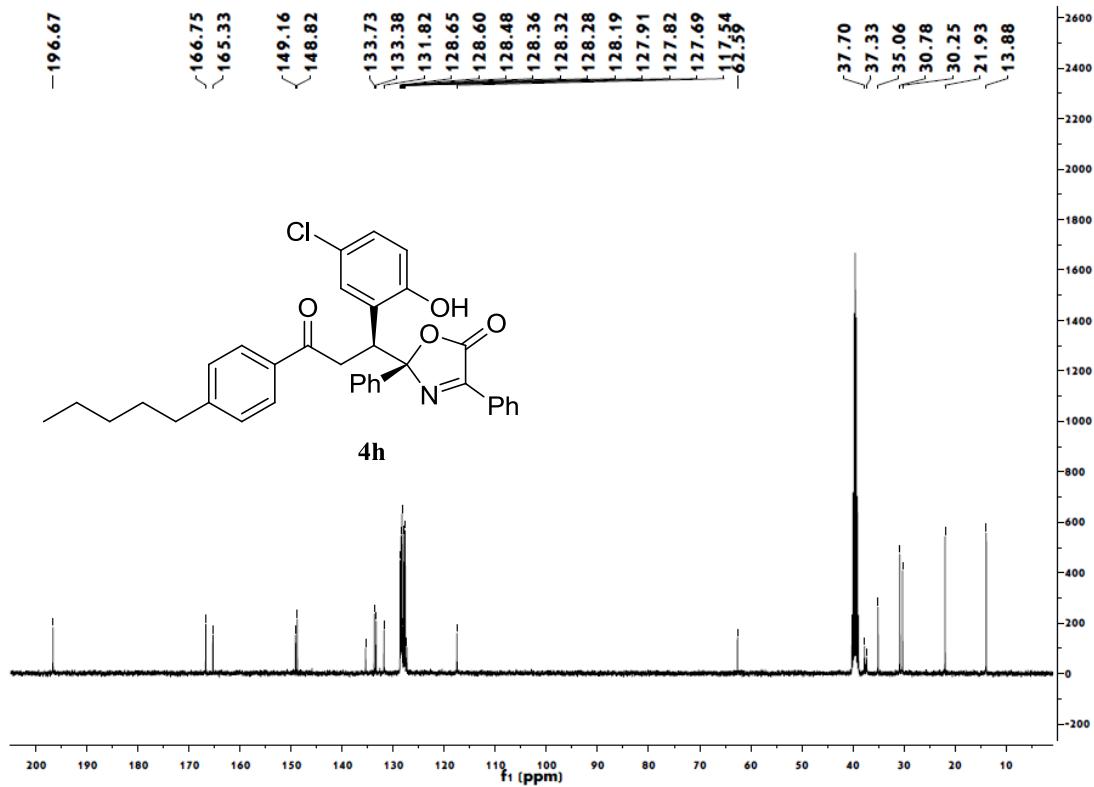

**(R)-2-((S)-1-(5-chloro-2-hydroxyphenyl)-3-(3-fluorophenyl)-3-oxopropyl)-2,4-diphenyloxazol-5(2H)-one 4i:**

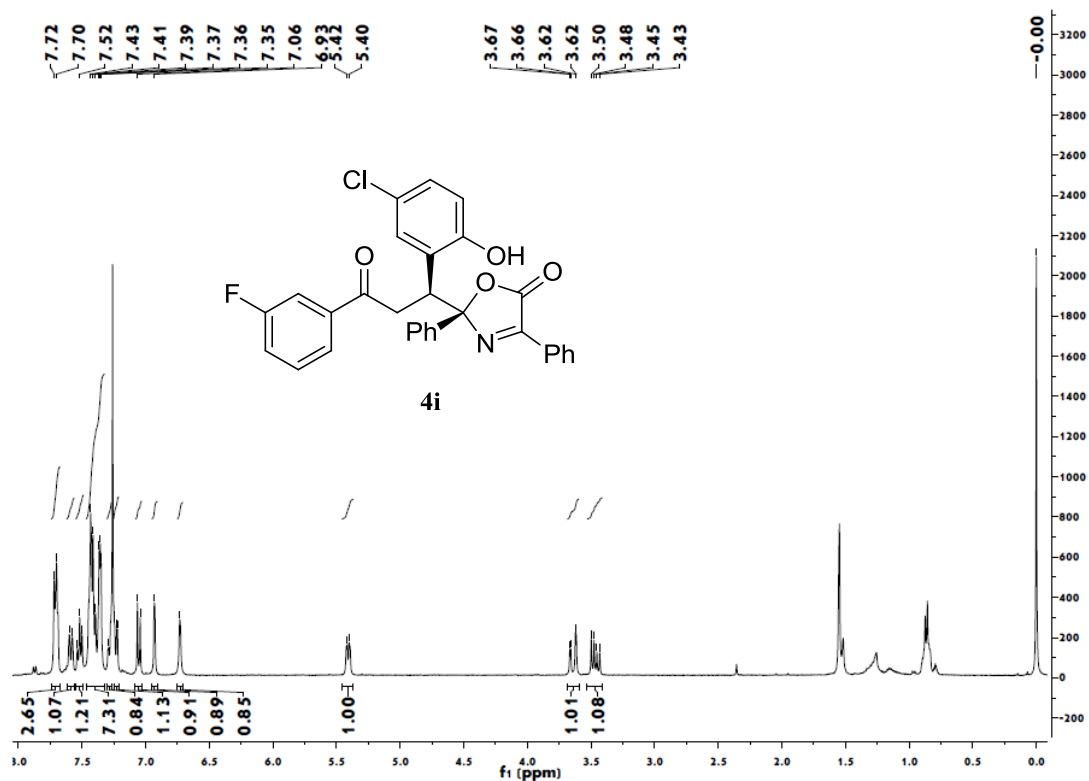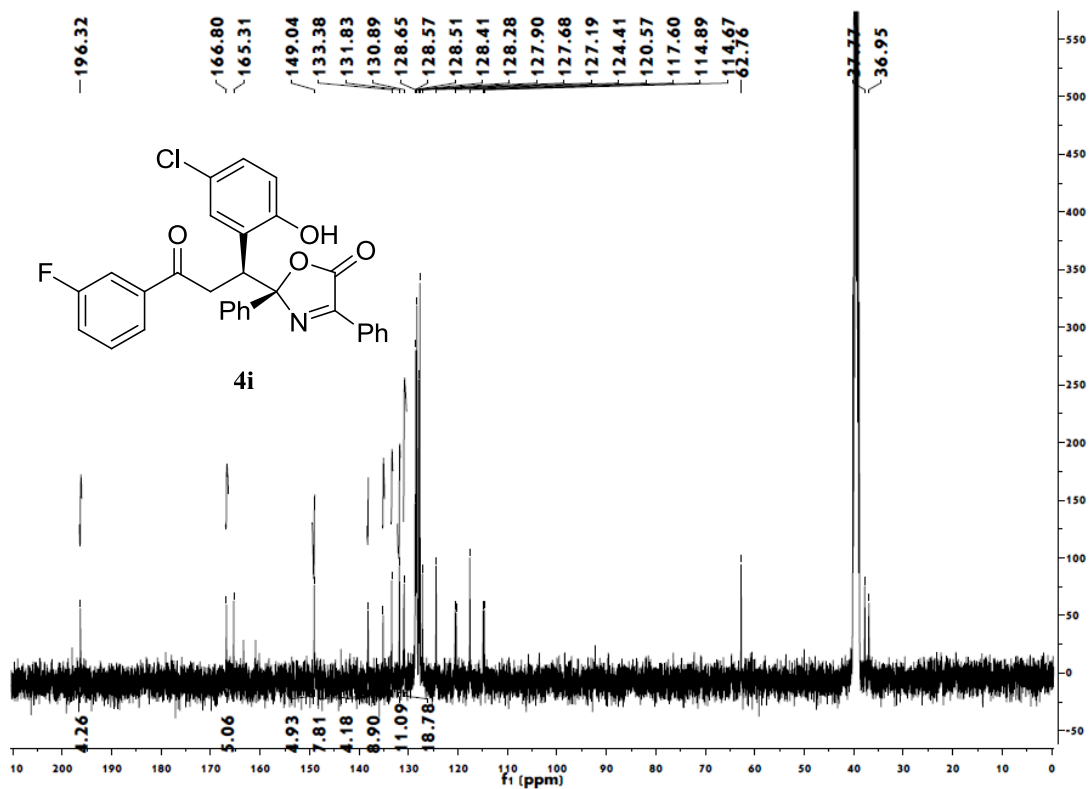

**(R)-2-((S)-1-(5-chloro-2-hydroxyphenyl)-3-(3-chlorophenyl)-3-oxopropyl)-2,4-diphenyloxazole-5(2H)-one 4j:**

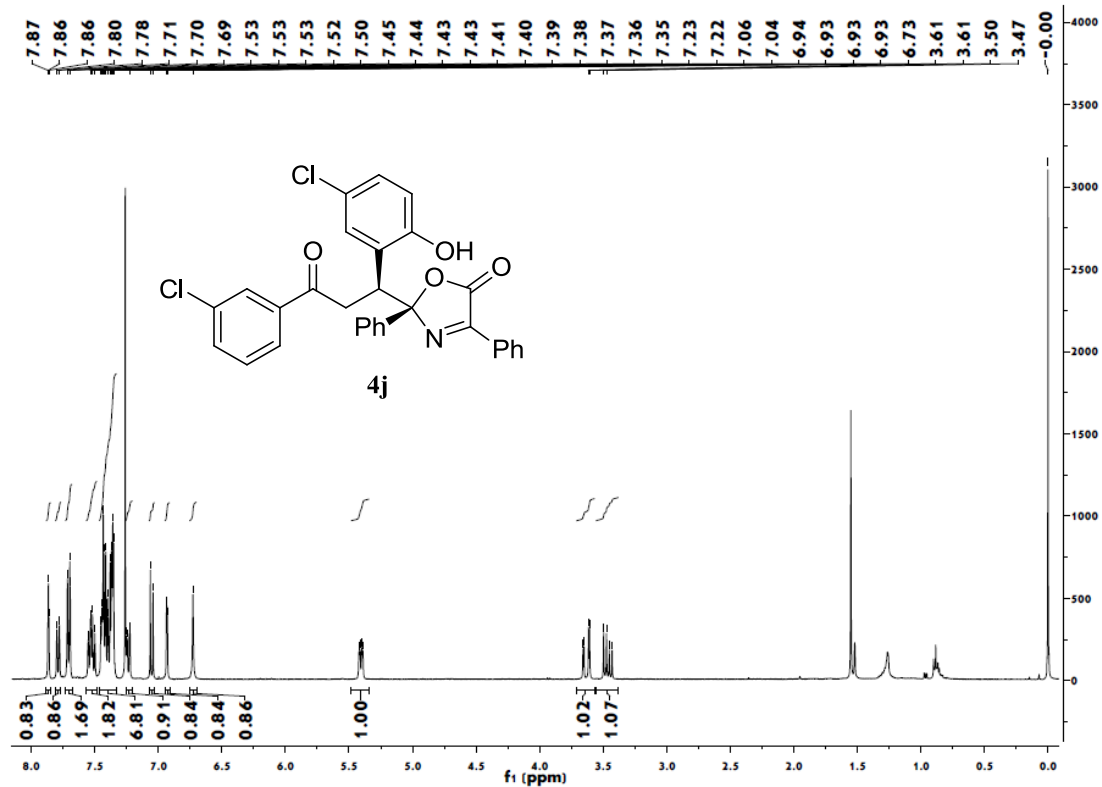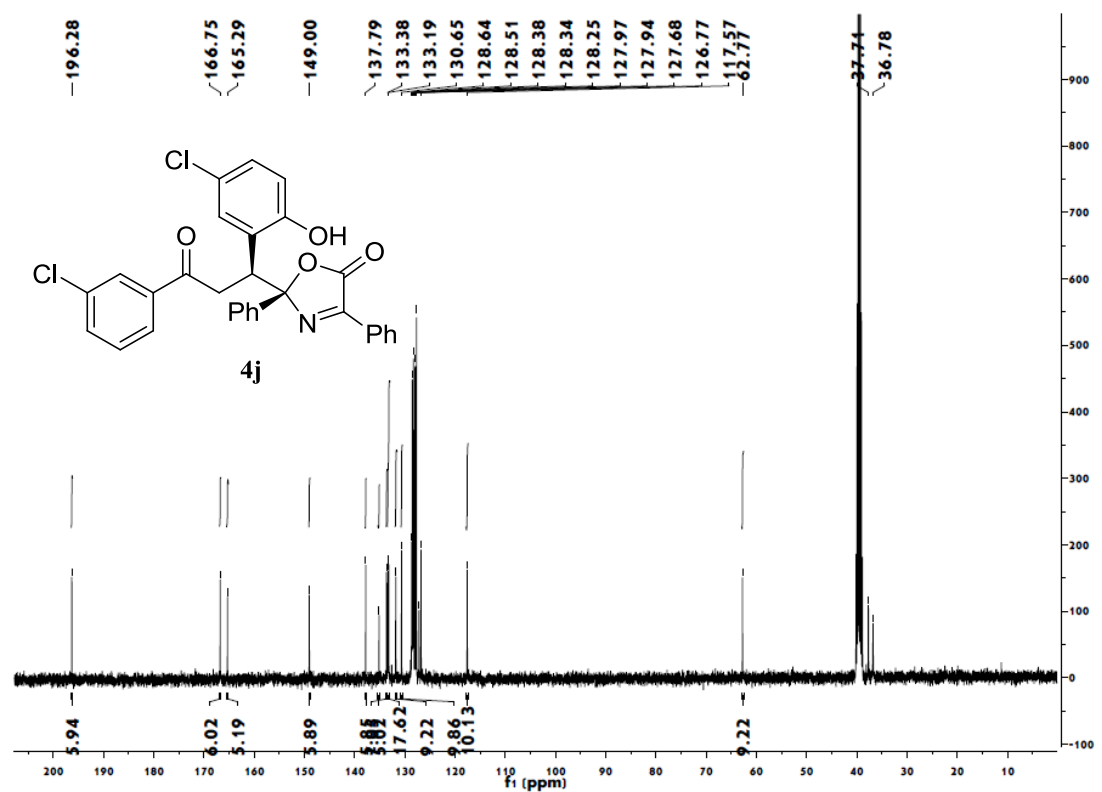

**(R)-2-((S)-1-(5-chloro-2-hydroxyphenyl)-3-(2-fluorophenyl)-3-oxopropyl)-2,4-diphenyloxazol-5(2H)-one 4k:**

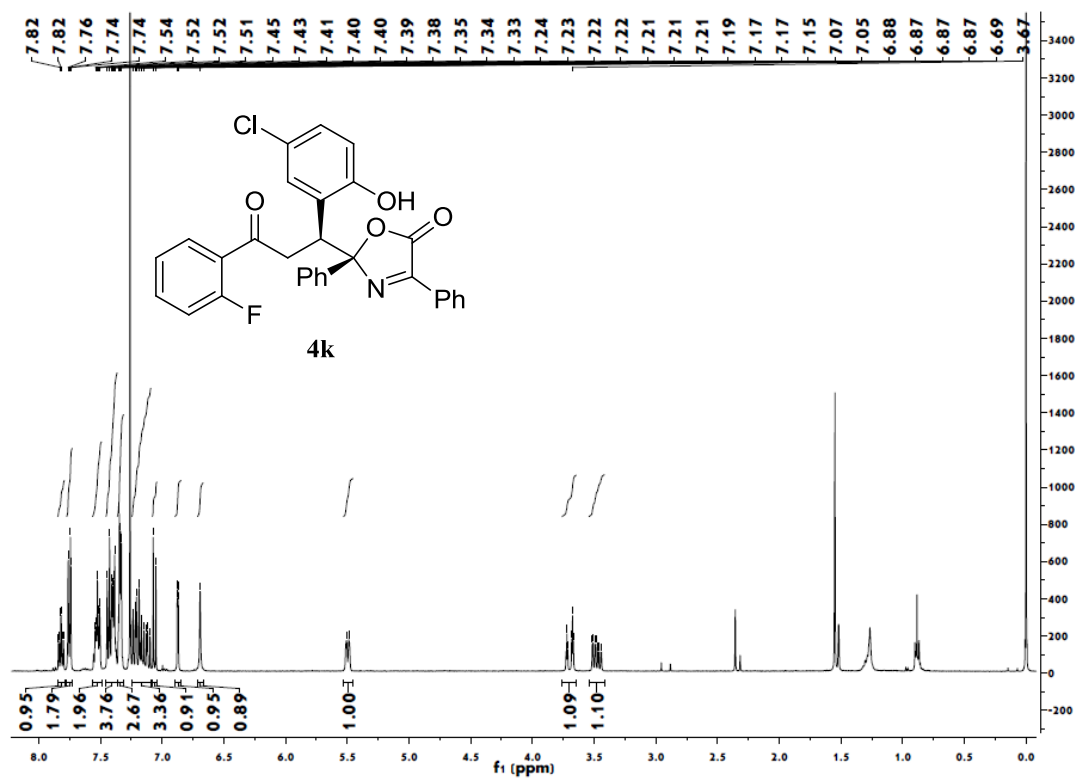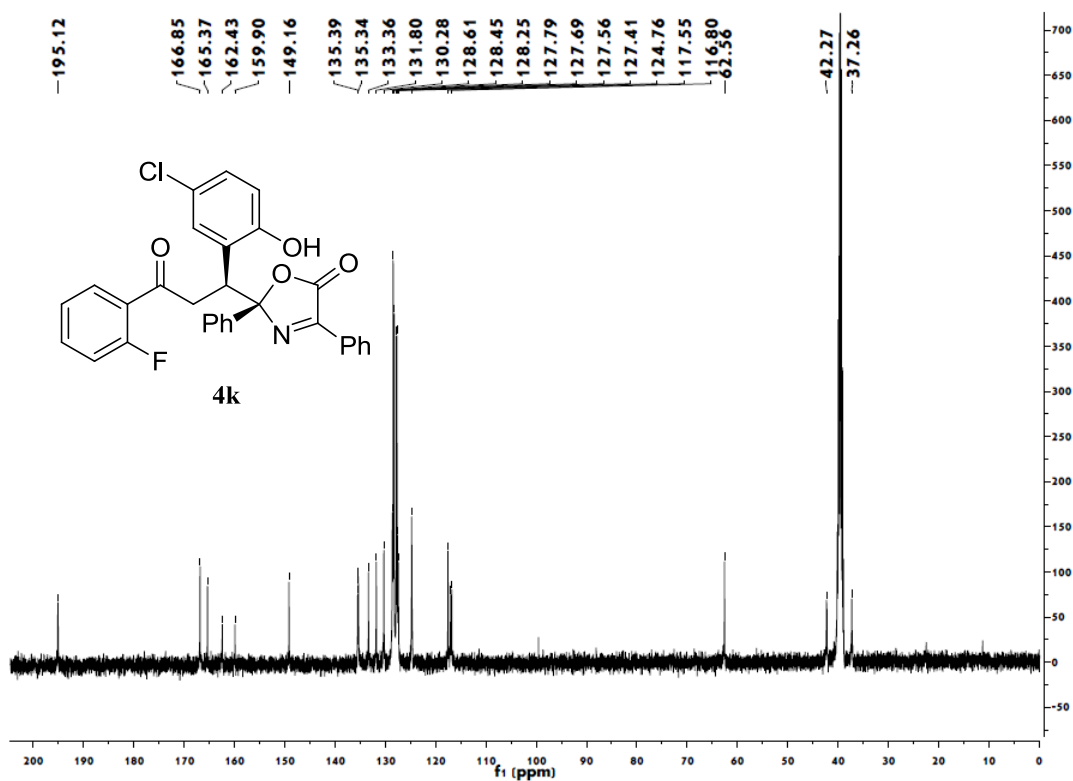

**(R)-2-((S)-1-(5-chloro-2-hydroxyphenyl)-3-(3,4-difluorophenyl)-3-oxopropyl)-2,4-diphenylloxazol-5(2H)-one 4l:**

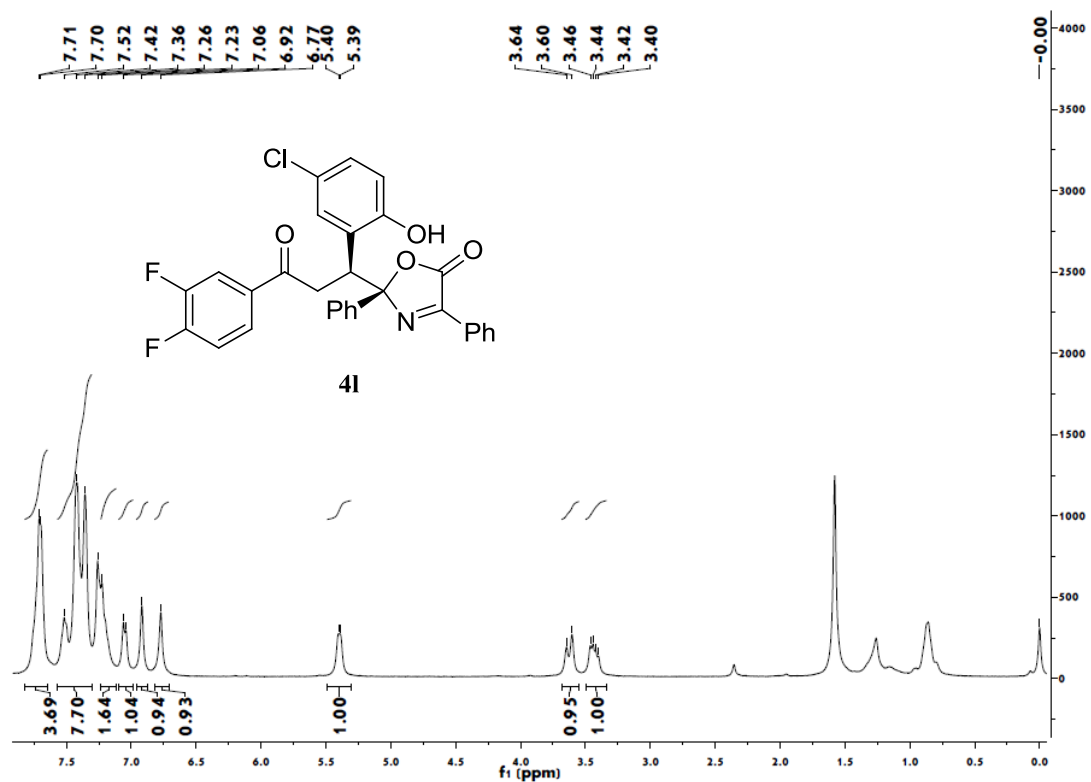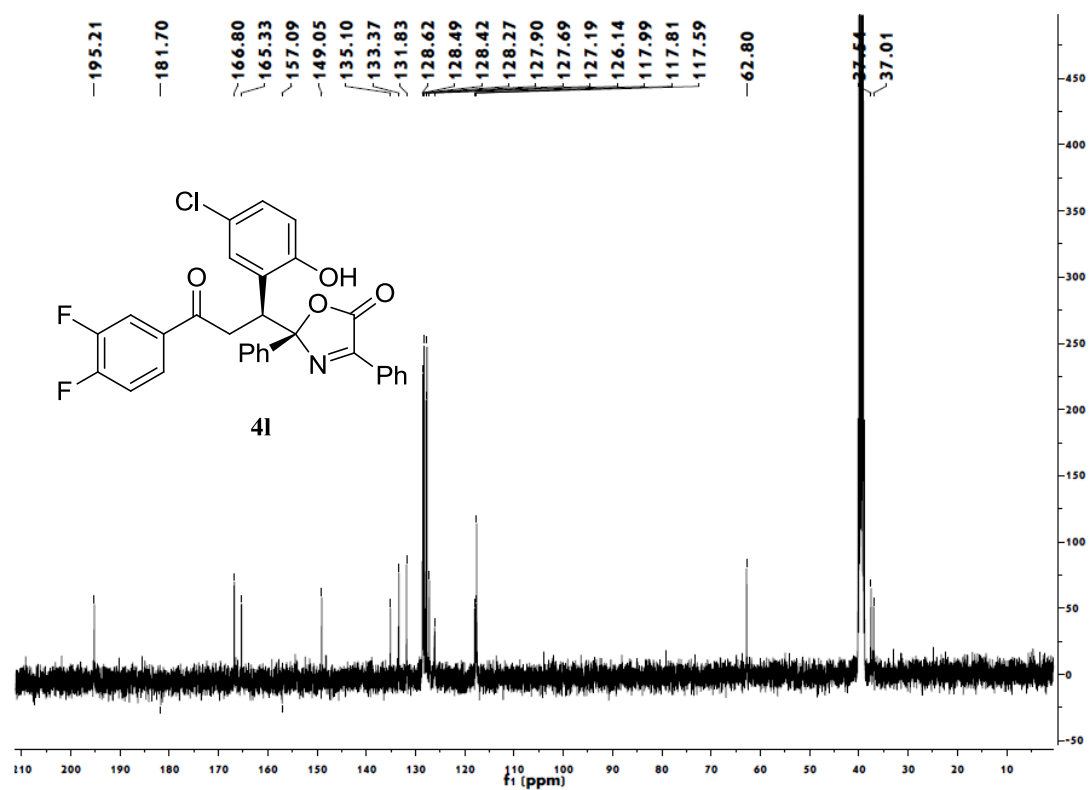

**(R)-2-((S)-1-(5-chloro-2-hydroxyphenyl)-3-(furan-2-yl)-3-oxopropyl)-2,4-diphenyloxazol-5(2H)-one 4m:**

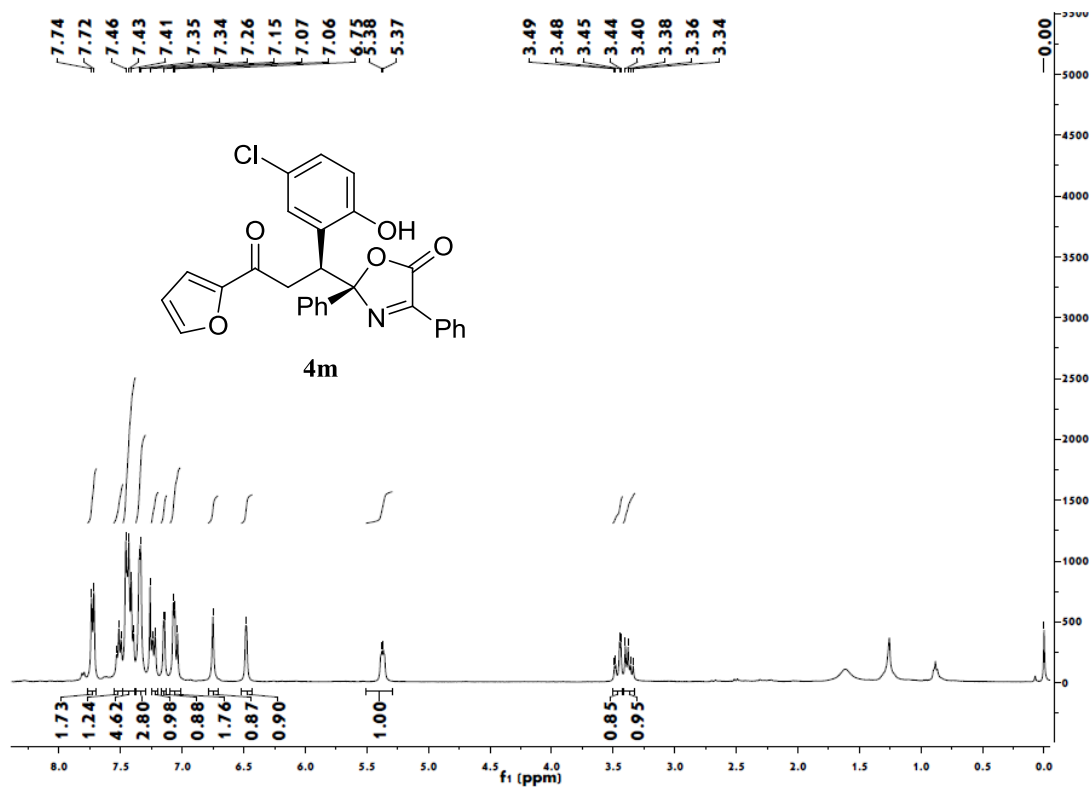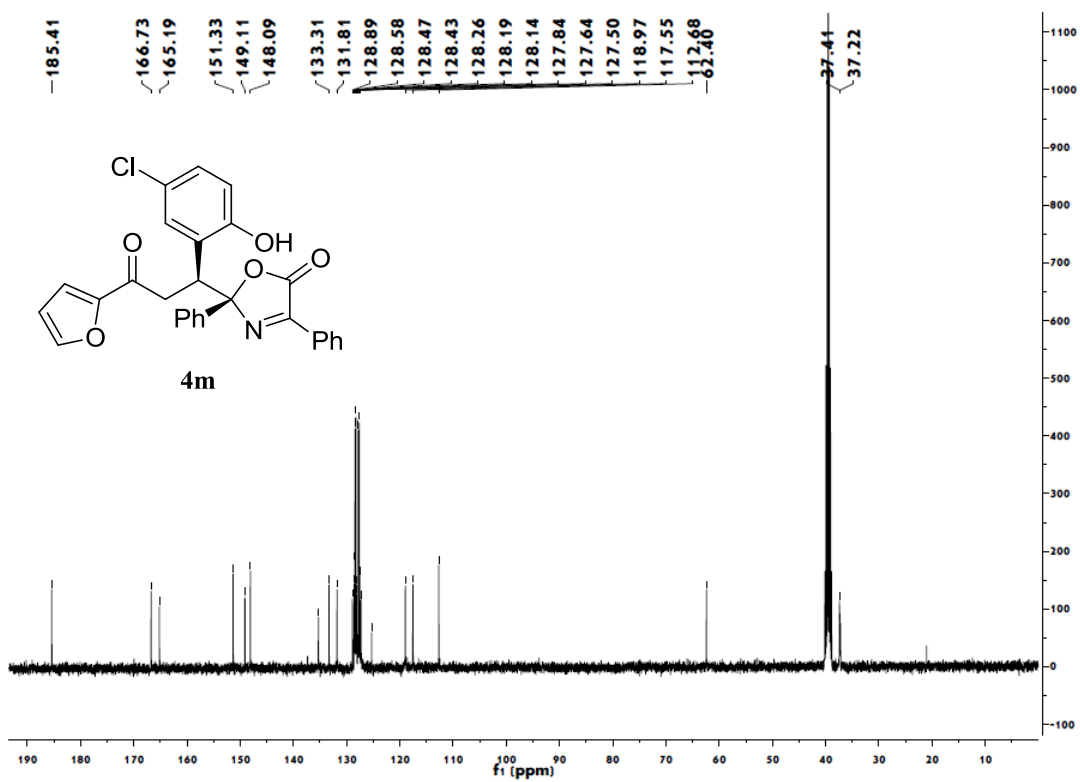



**(R)-2-((S)-1-(5-chloro-2-hydroxyphenyl)-3-oxo-3-(thiophen-2-yl)propyl)-2,4-diphenyloxazol-5(2H)-one 4n:**

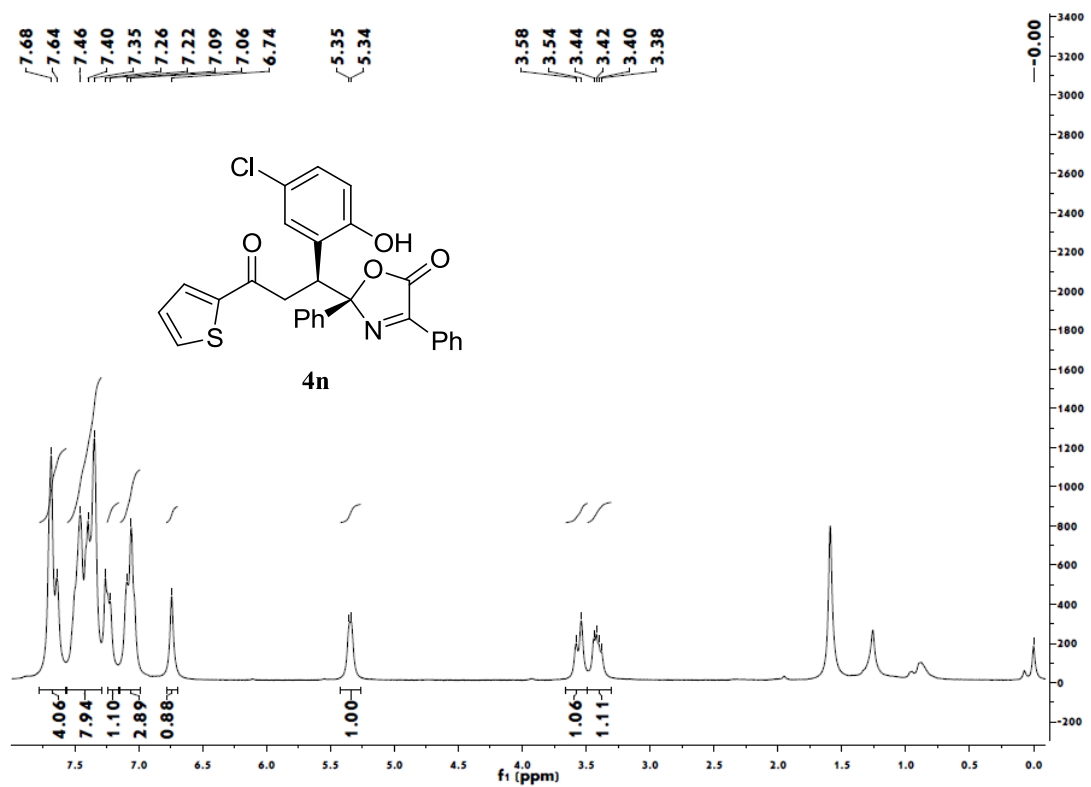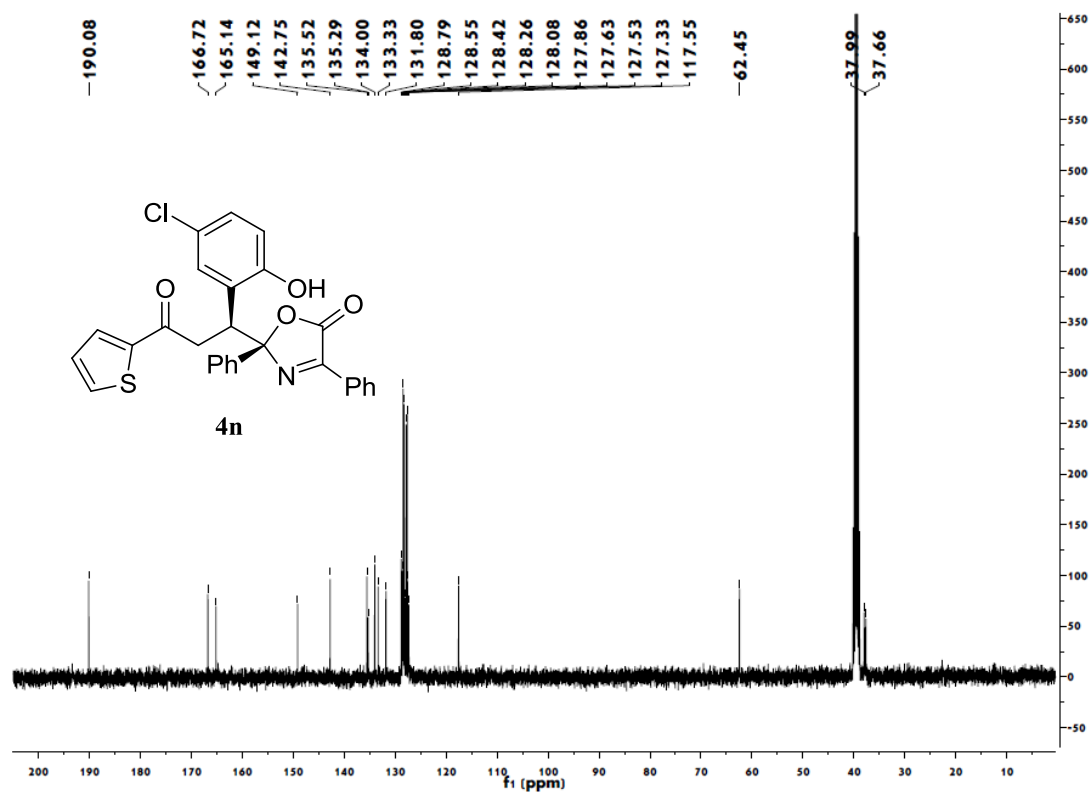

**(R)-2-((R)-1-(2-hydroxyphenyl)-3-oxobutyl)-2,4-diphenyloxazol-5(2H)-one 4o:**

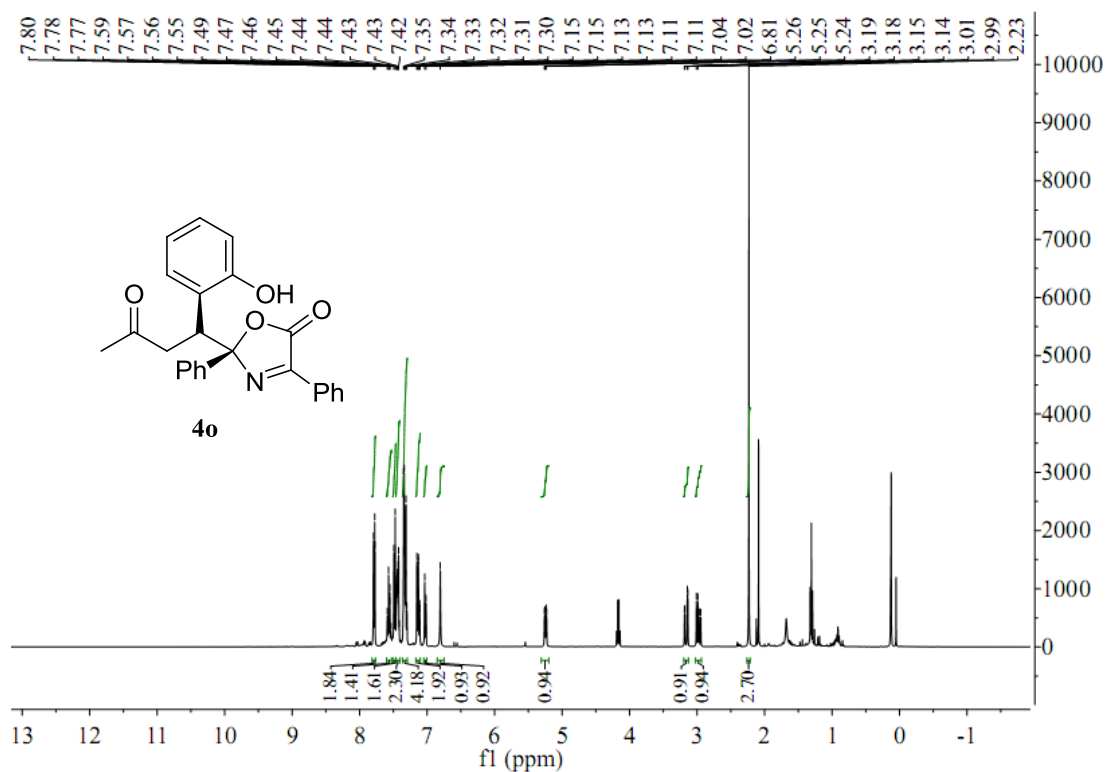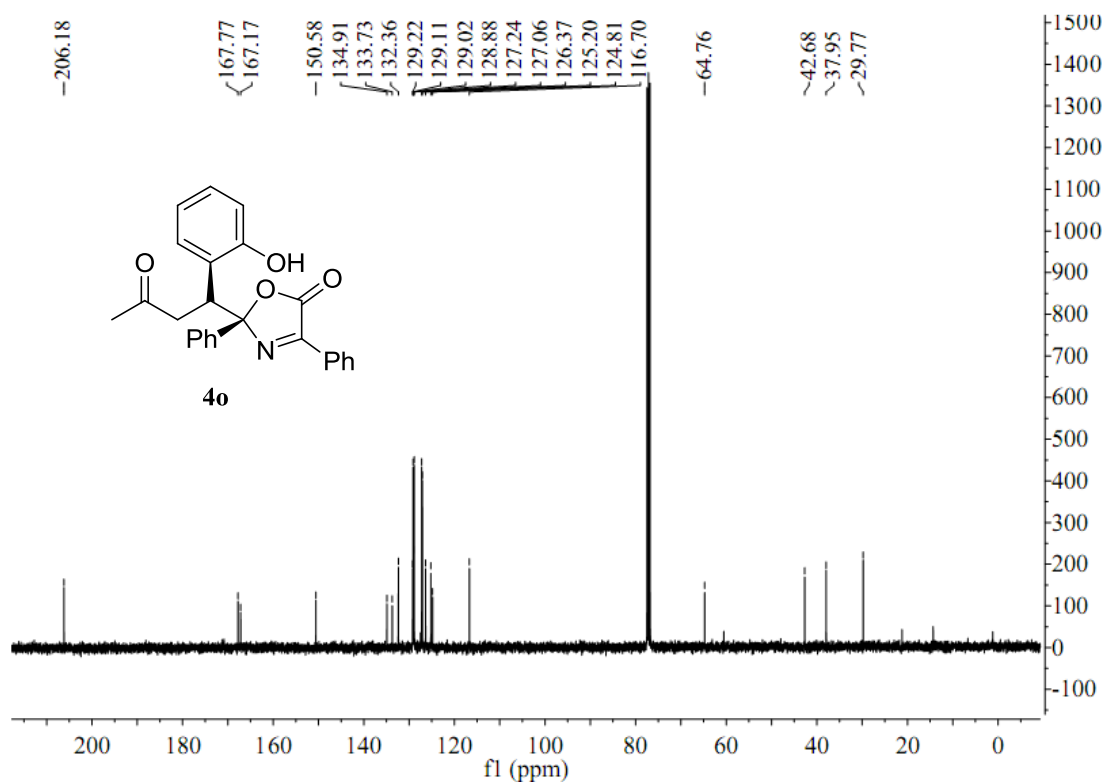

**(R)-2-((S)-1-(2-hydroxyphenyl)-3-oxo-3-phenylpropyl)-2,4-diphenyloxazol-5(2H)-one 4p:**

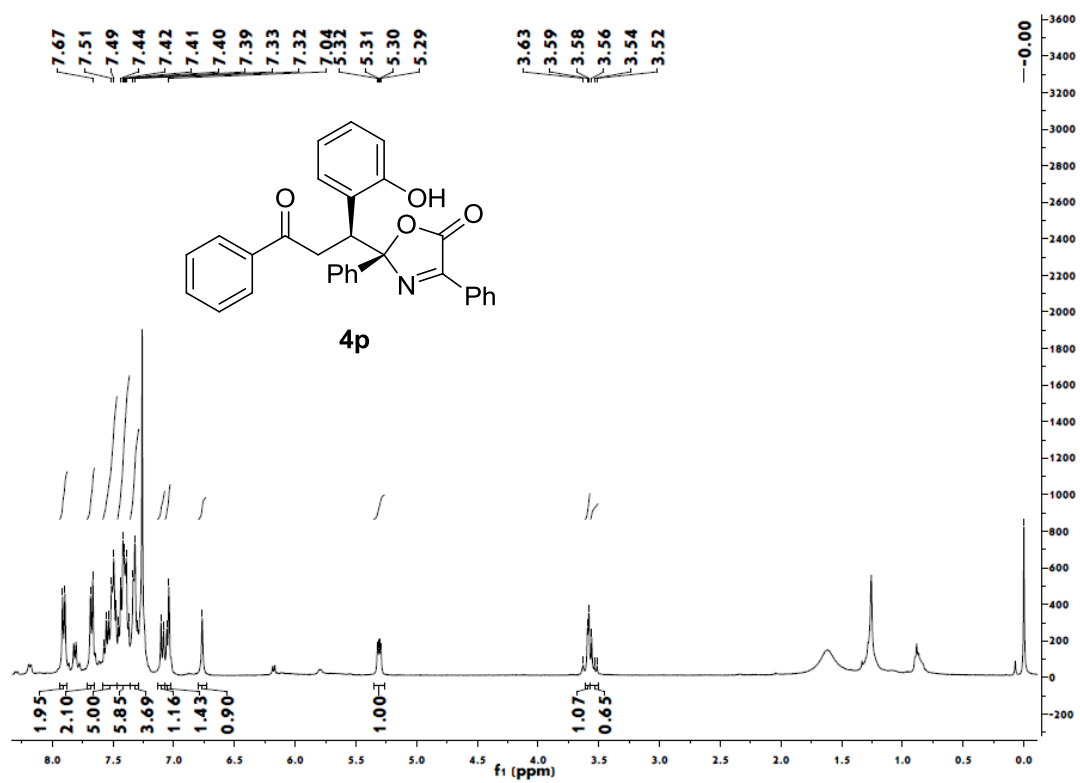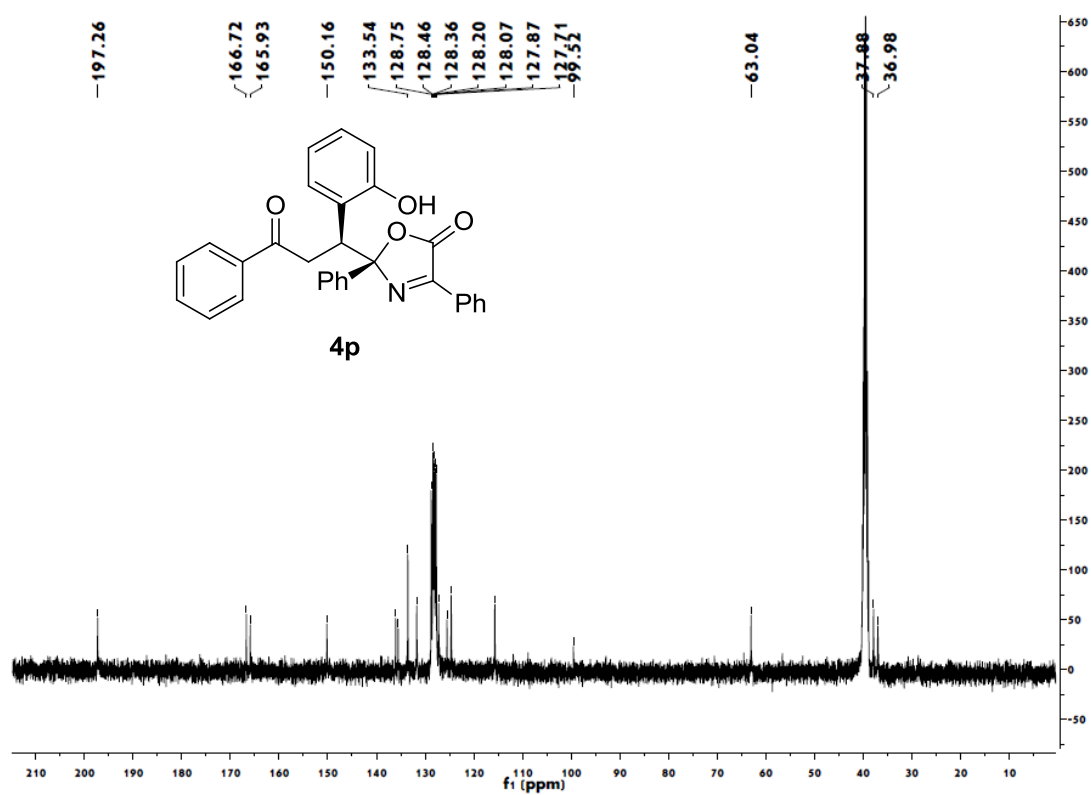

**(R)-2-((S)-3-(4-chlorophenyl)-1-(2-hydroxyphenyl)-3-oxopropyl)-2,4-diphenyloxazol-5(2H)-one 4q:**

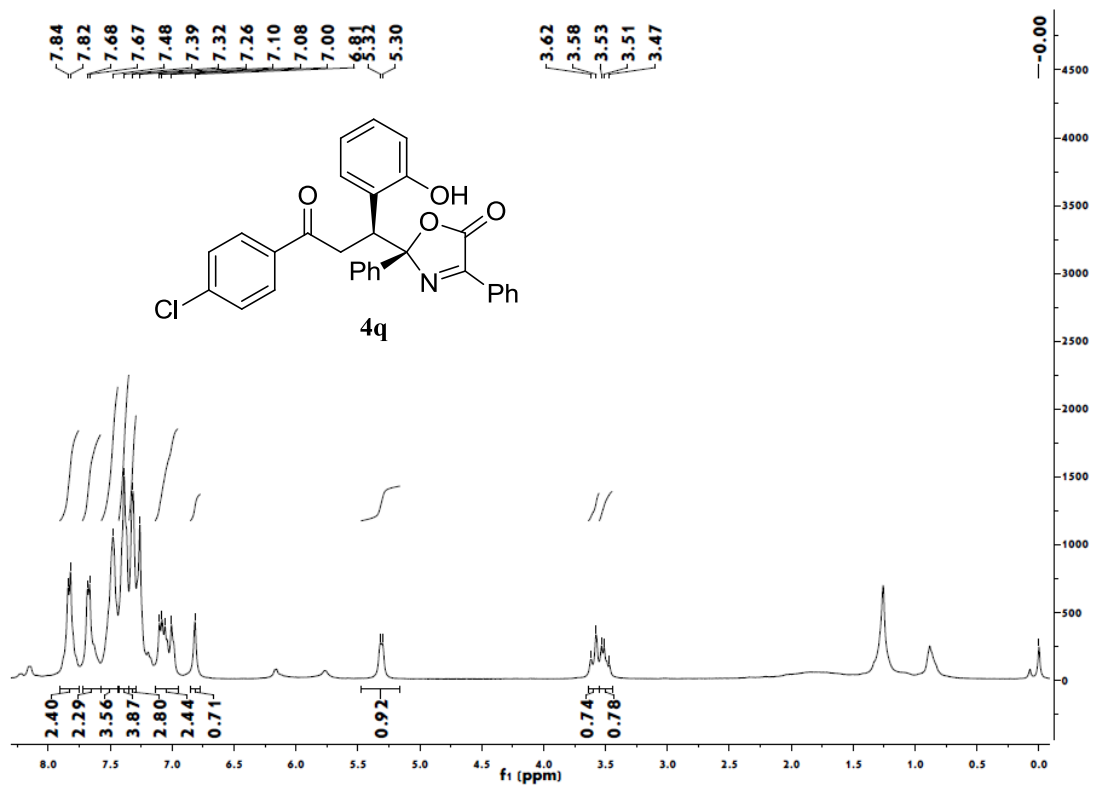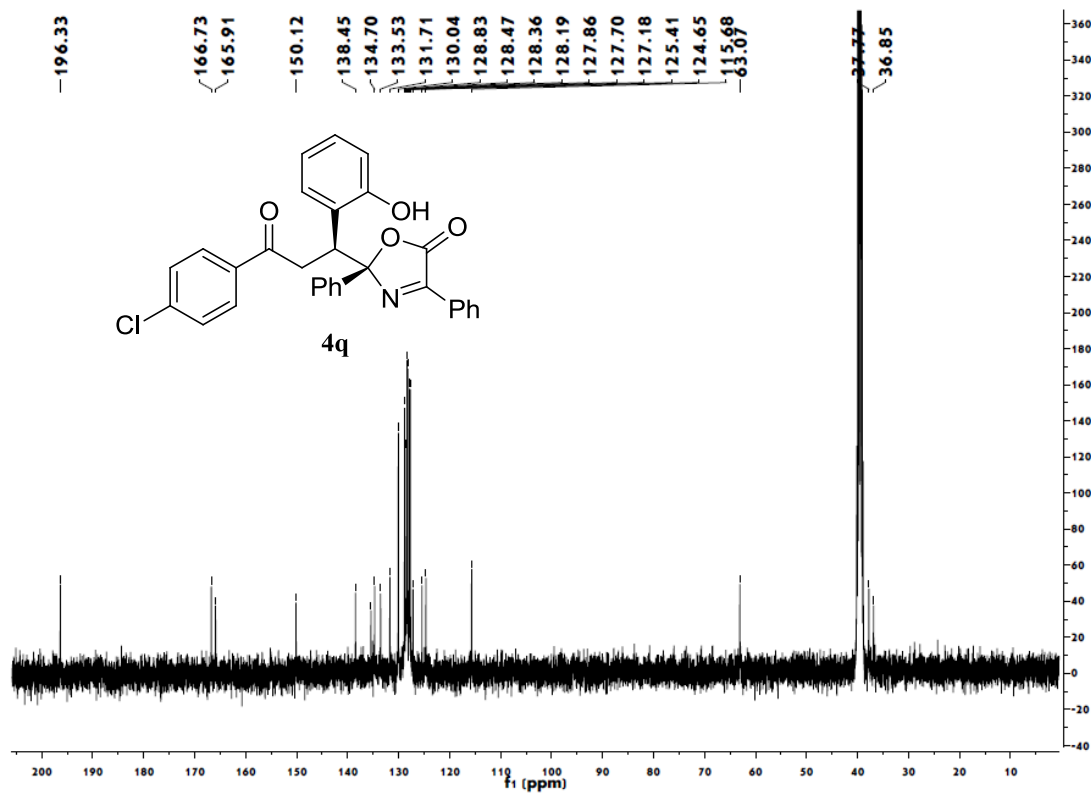

**(R)-2-((S)-3-(4-bromophenyl)-1-(2-hydroxyphenyl)-3-oxopropyl)-2,4-diphenyloxazol-5(2H)-one 4r:**

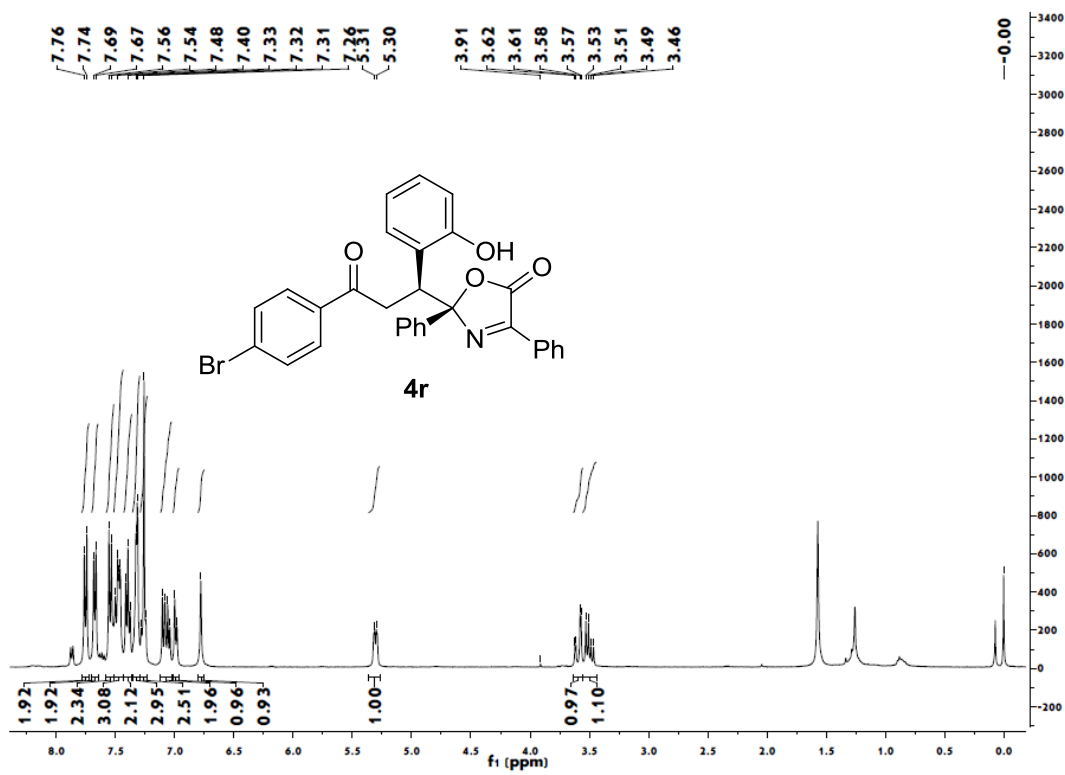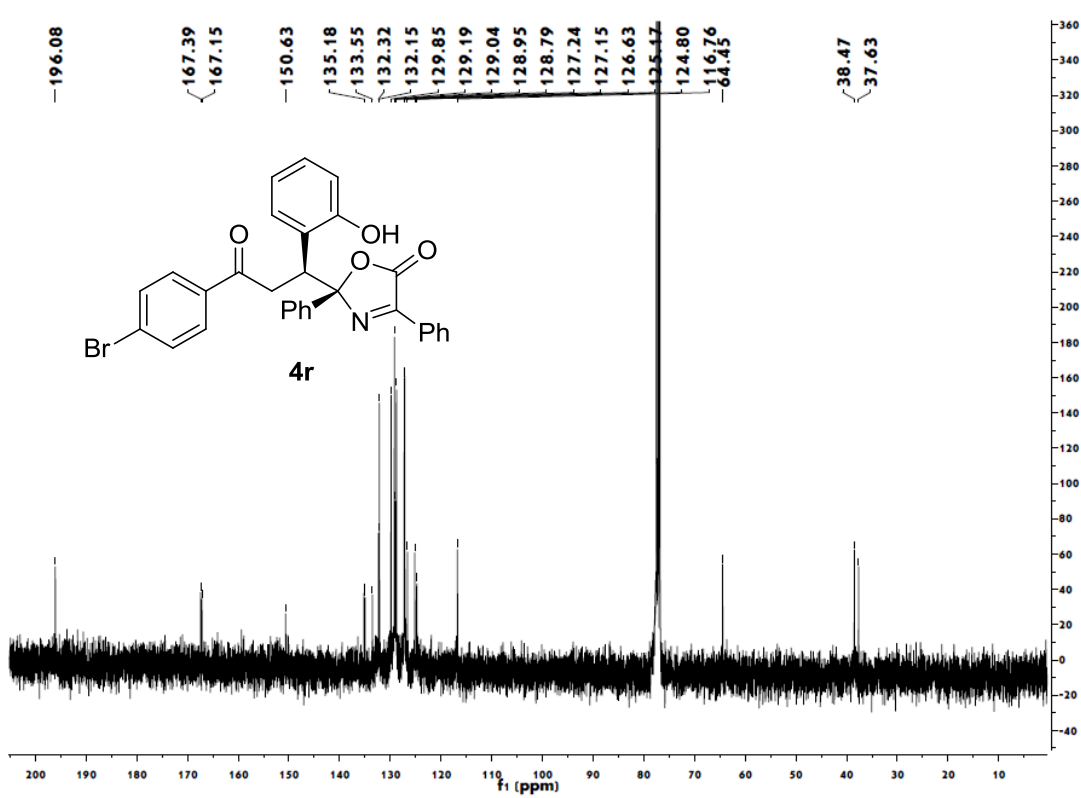

**(R)-2-((S)-1-(2-hydroxy-5-methylphenyl)-3-oxo-3-phenylpropyl)-2,4-diphenyloxazol-5(2H)-one 4s:**

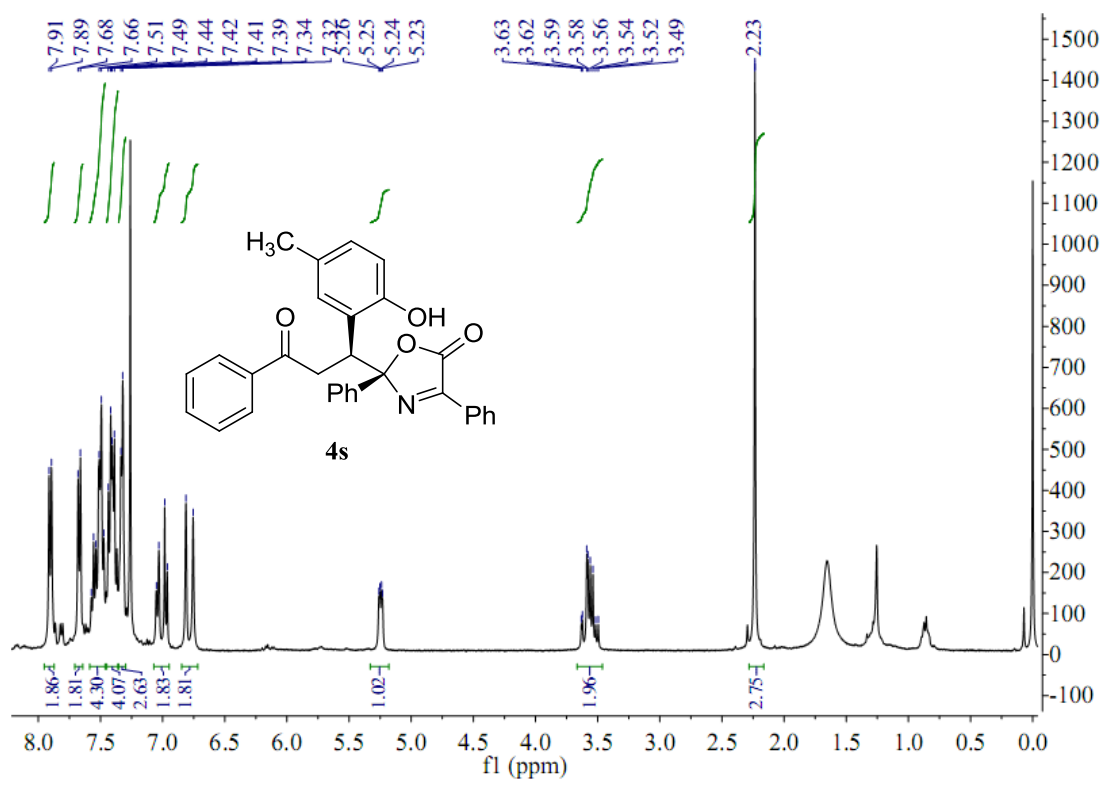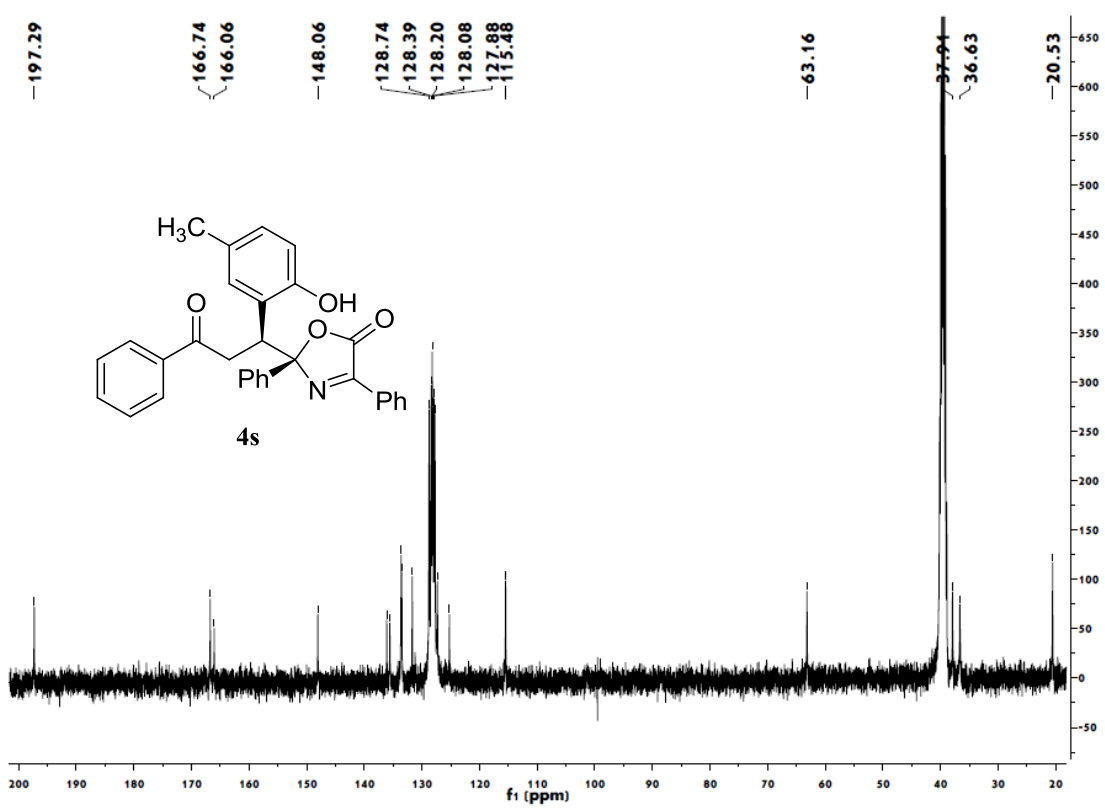

**(R)-2-((S)-1-(2-hydroxy-3-methoxyphenyl)-3-oxo-3-phenylpropyl)-2,4-diphenyloxazol-5(2H)-one 4t:**

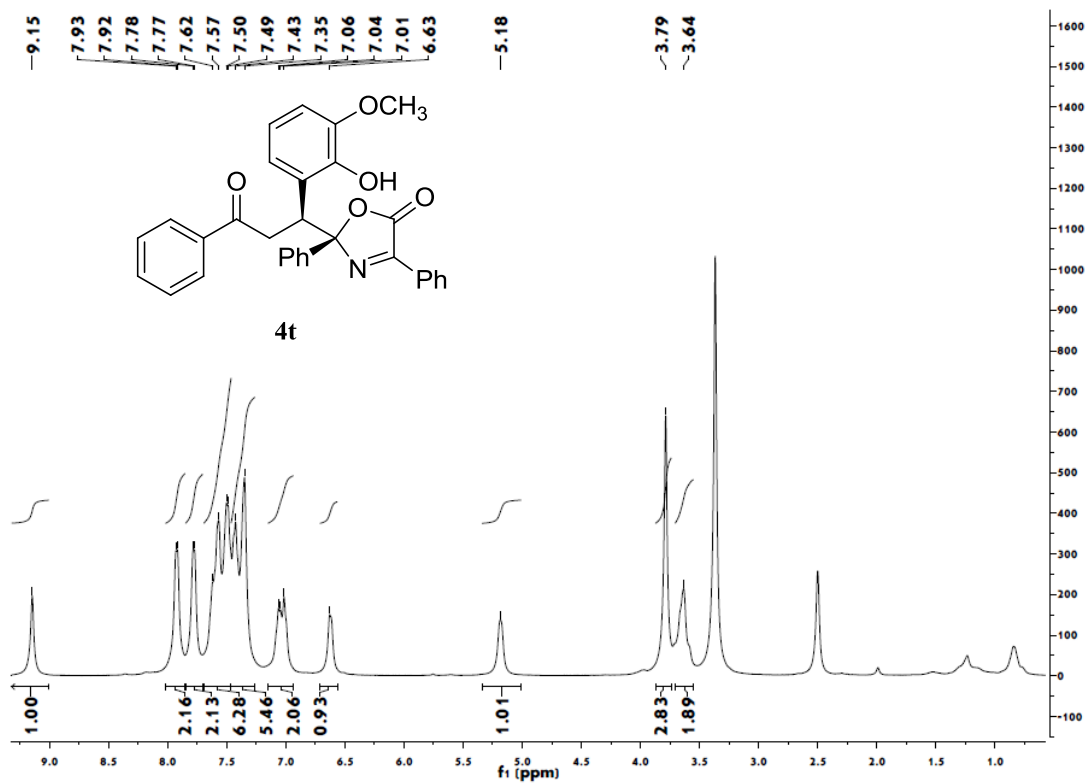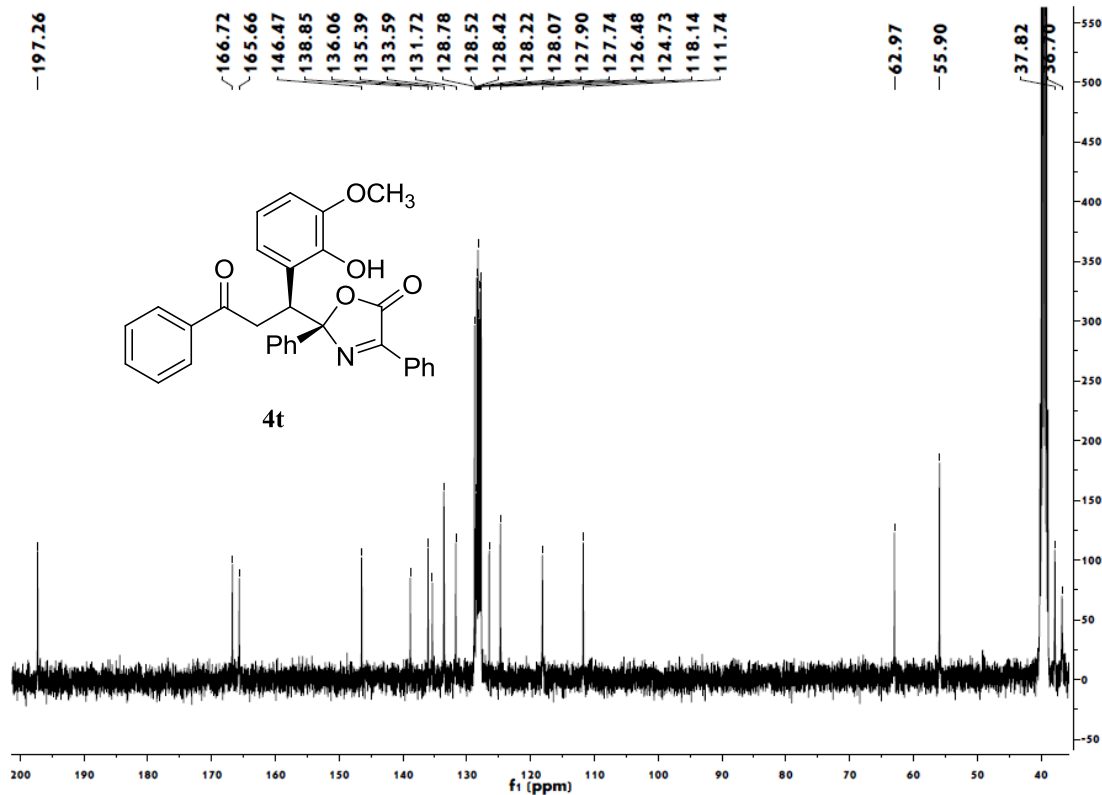

**(R)-2-((S)-1-(5-chloro-2-hydroxyphenyl)-3-oxo-3-phenylpropyl)-2-(4-fluorophenyl)-4-phenyl oxazol-5(2H)-one 4u:**

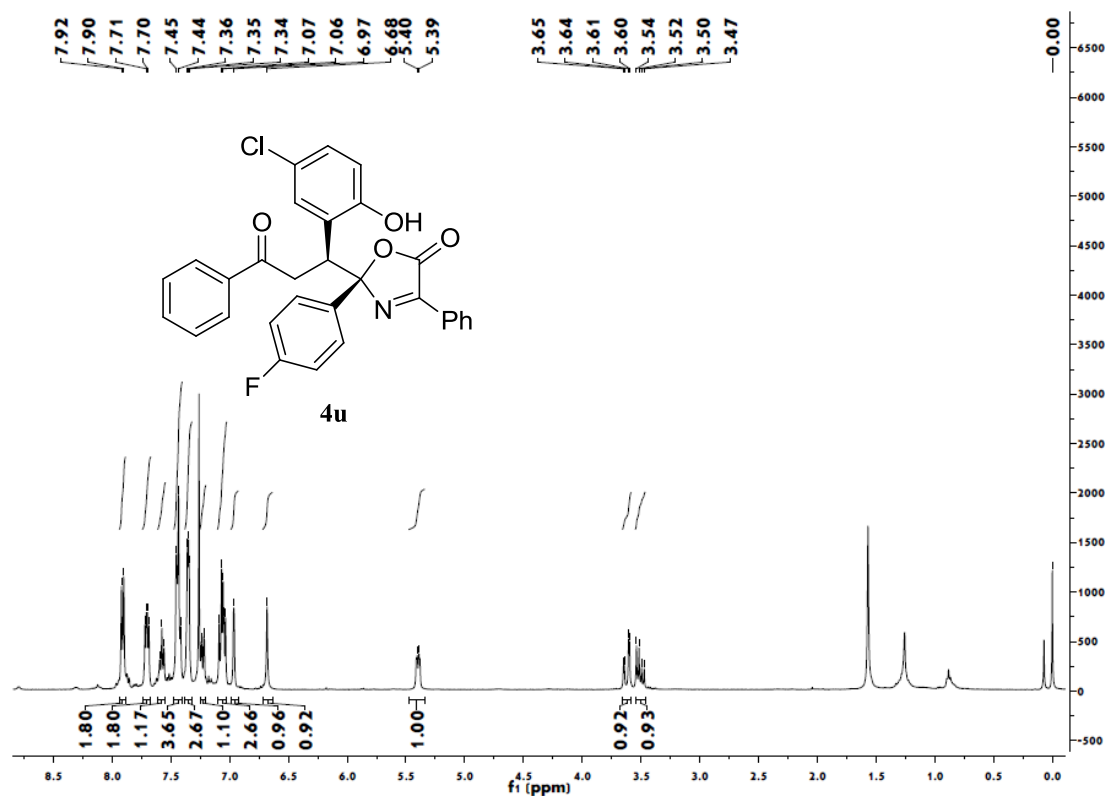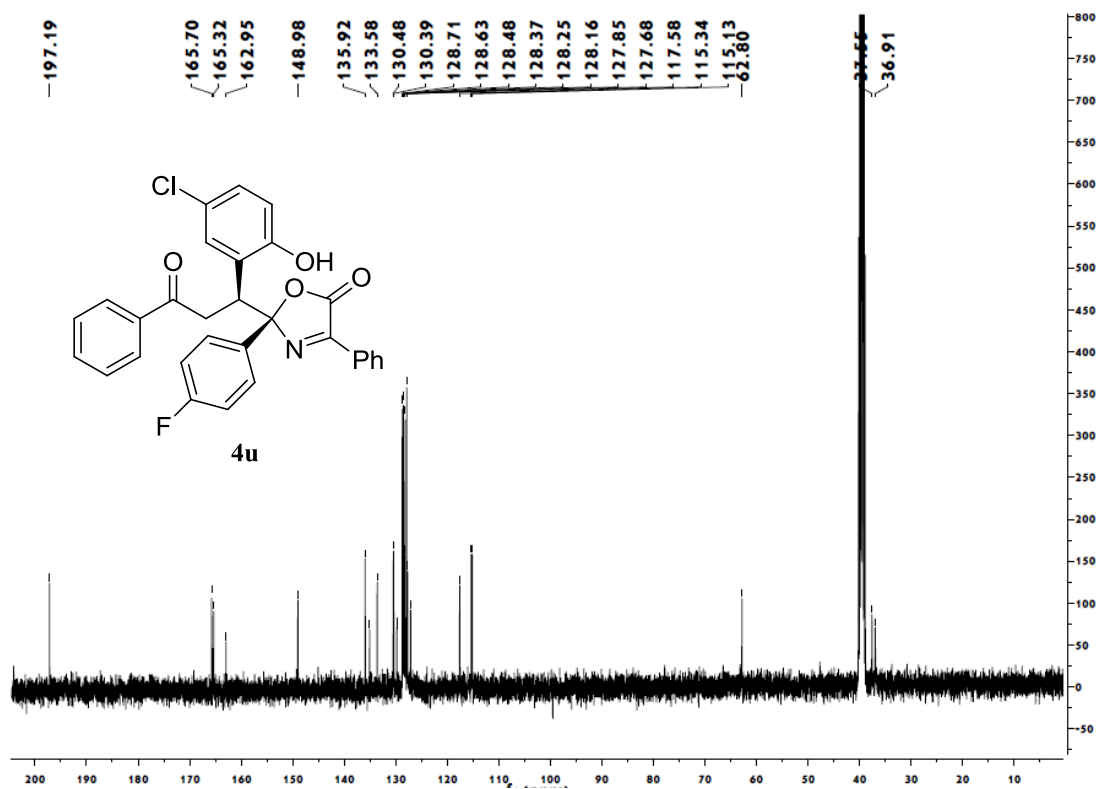



**(R)-2-((S)-1-(5-chloro-2-hydroxyphenyl)-3-oxo-3-phenylpropyl)-2-(4-chlorophenyl)-4-phenyl oxazol-5(2H)-one 4v:**

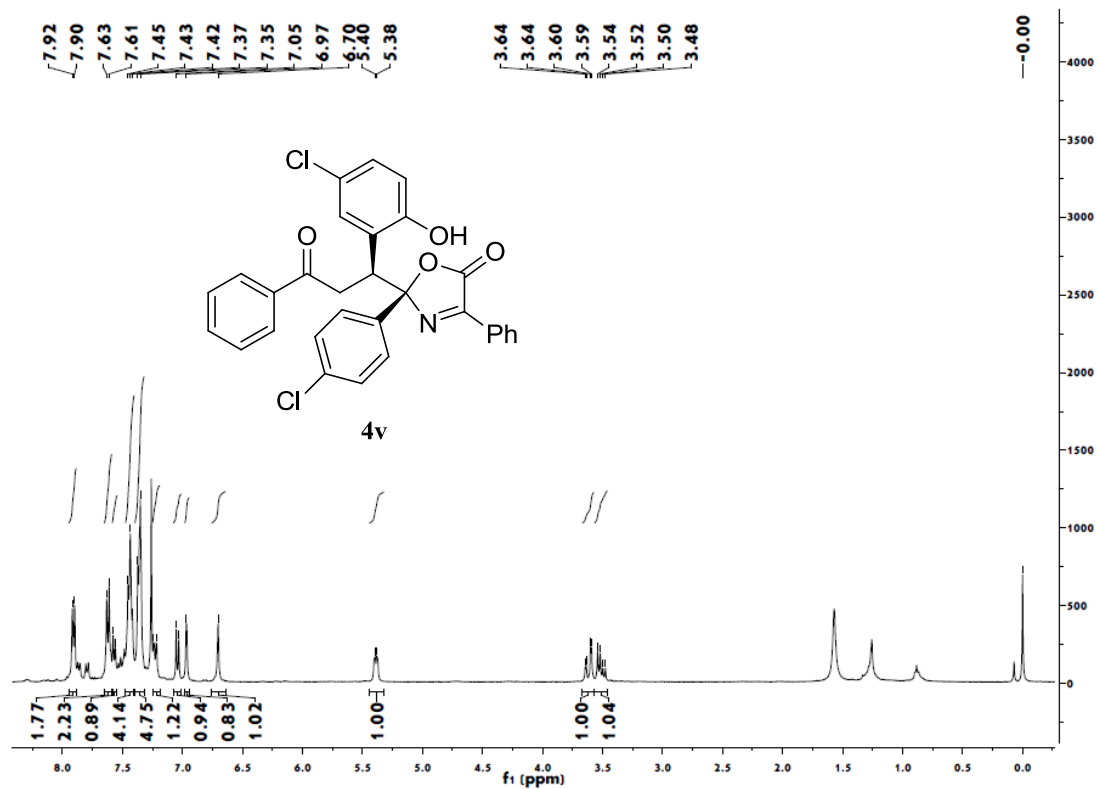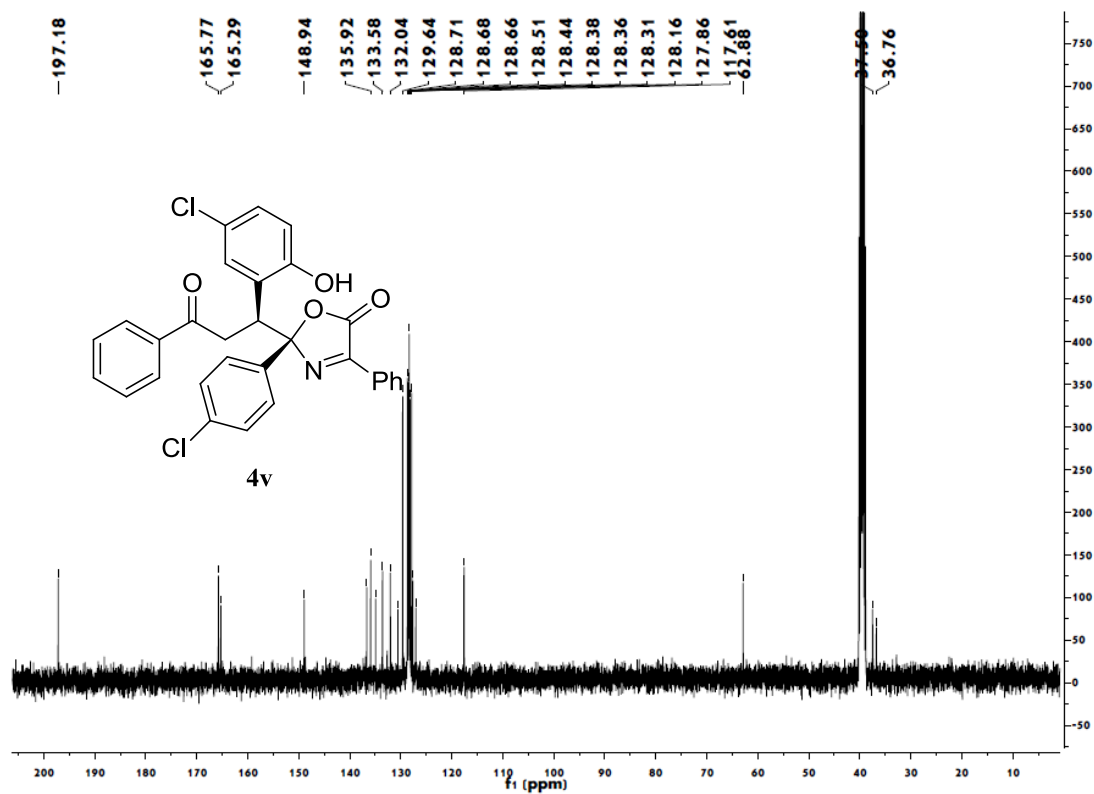

**(R)-2-((S)-1-(5-chloro-2-hydroxyphenyl)-3-oxo-3-phenylpropyl)-2-(4-methoxyphenyl)-4-phenyloxazol-5(2H)-one 4w:**

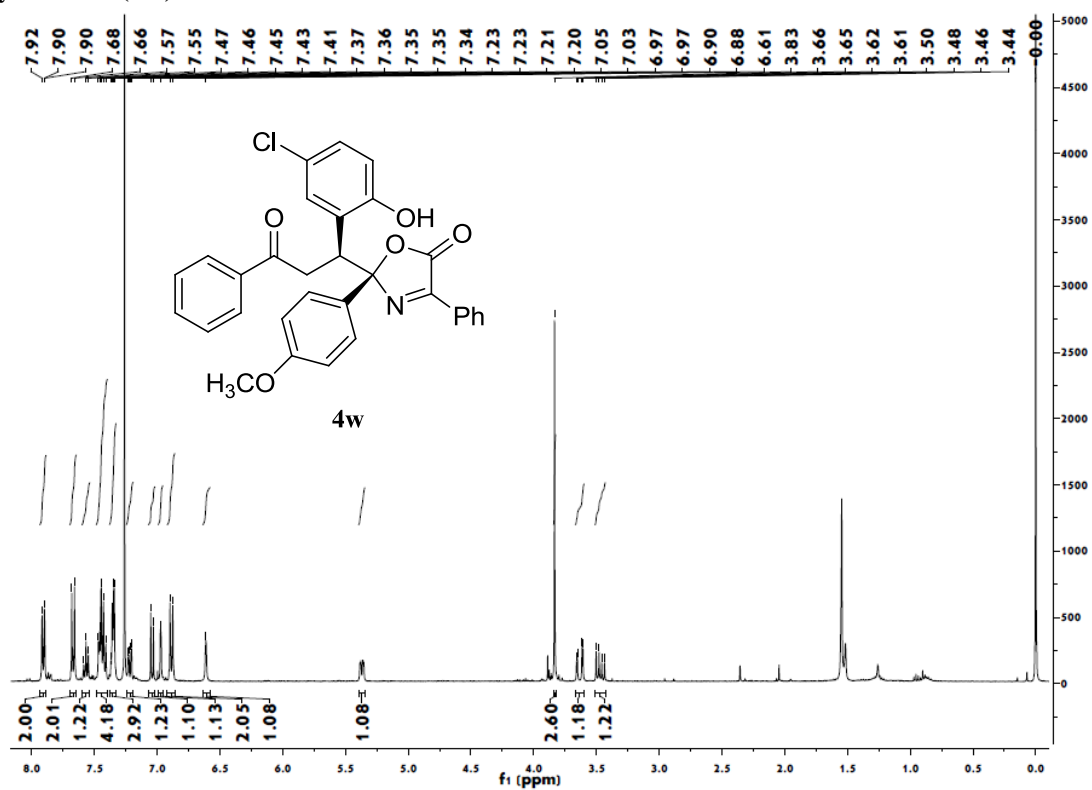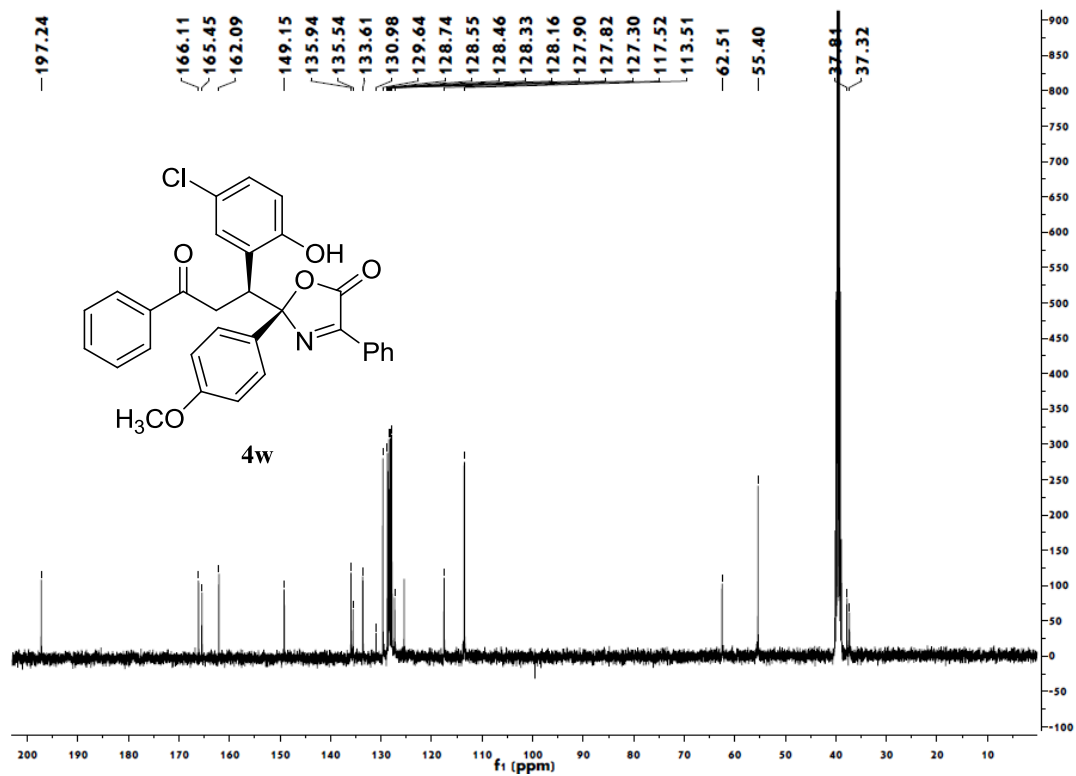

**(R)-2-((S)-1-(5-chloro-2-hydroxyphenyl)-3-oxo-3-phenylpropyl)-4-phenyl-2-(p-tolyl)oxazol-5(2H)-one 4x:**

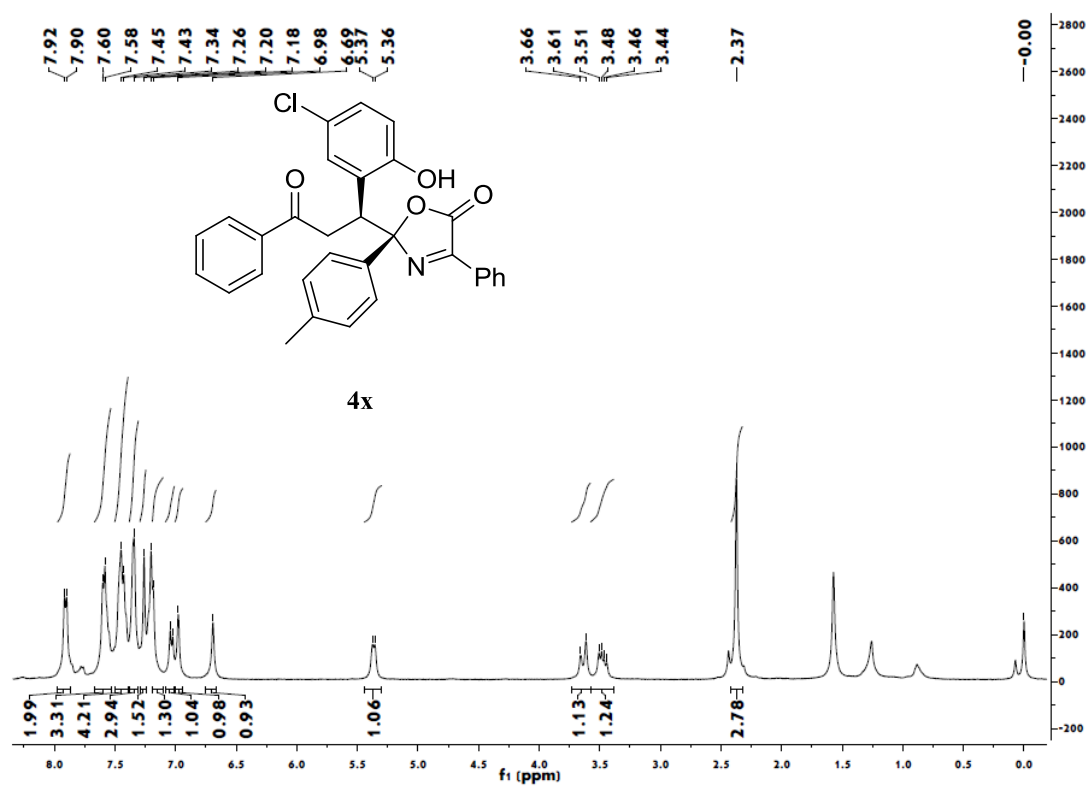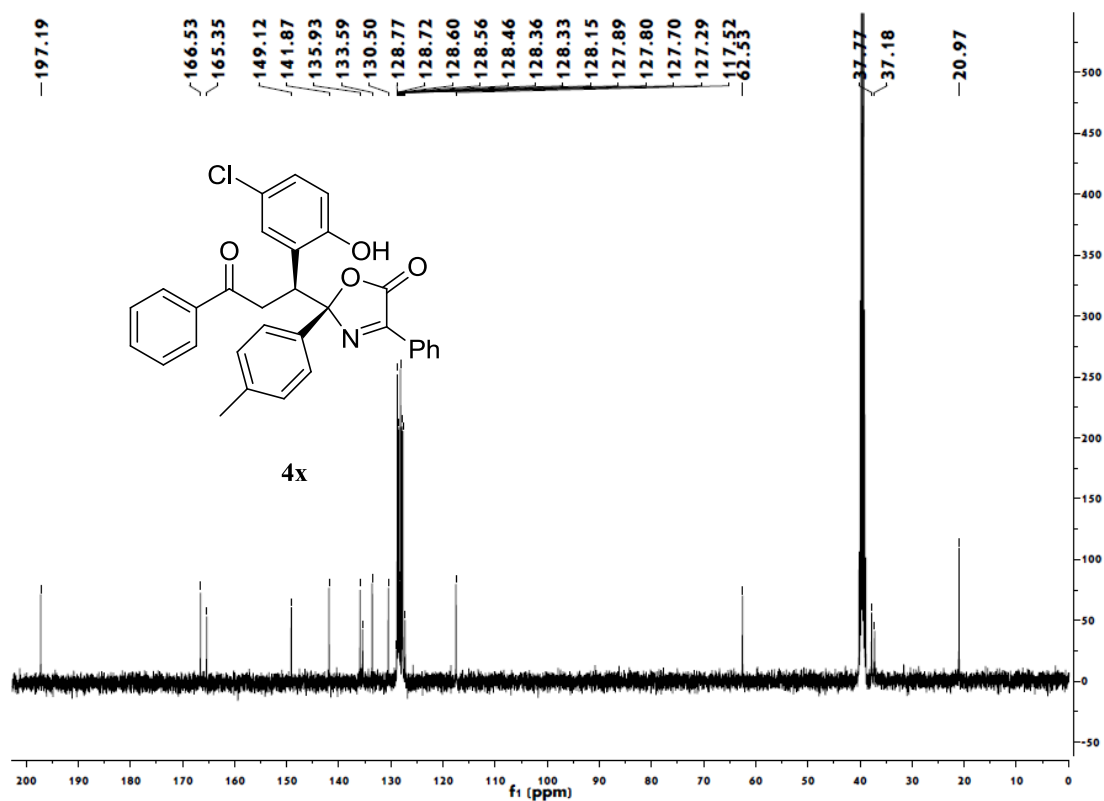

**(R)-2-((S)-1-(5-chloro-2-hydroxyphenyl)-3-oxo-3-phenylpropyl)-4-phenyl-2-(m-tolyl)oxazol-5(2H)-one 4y:**

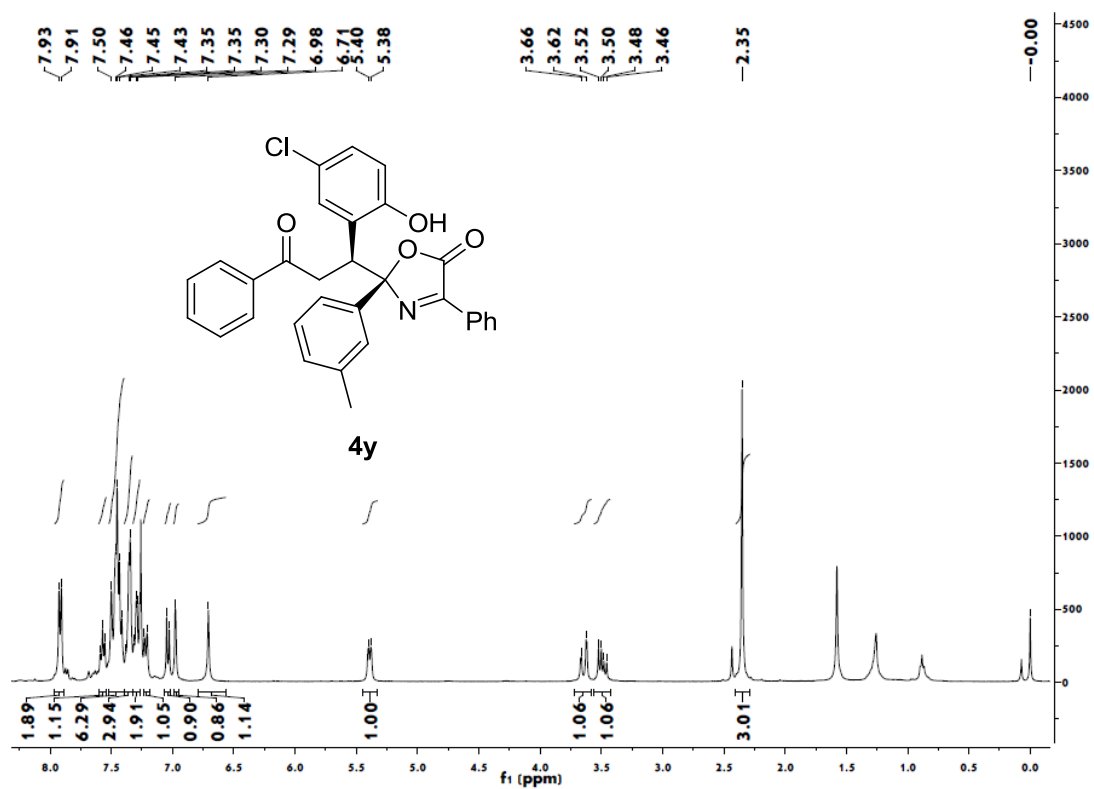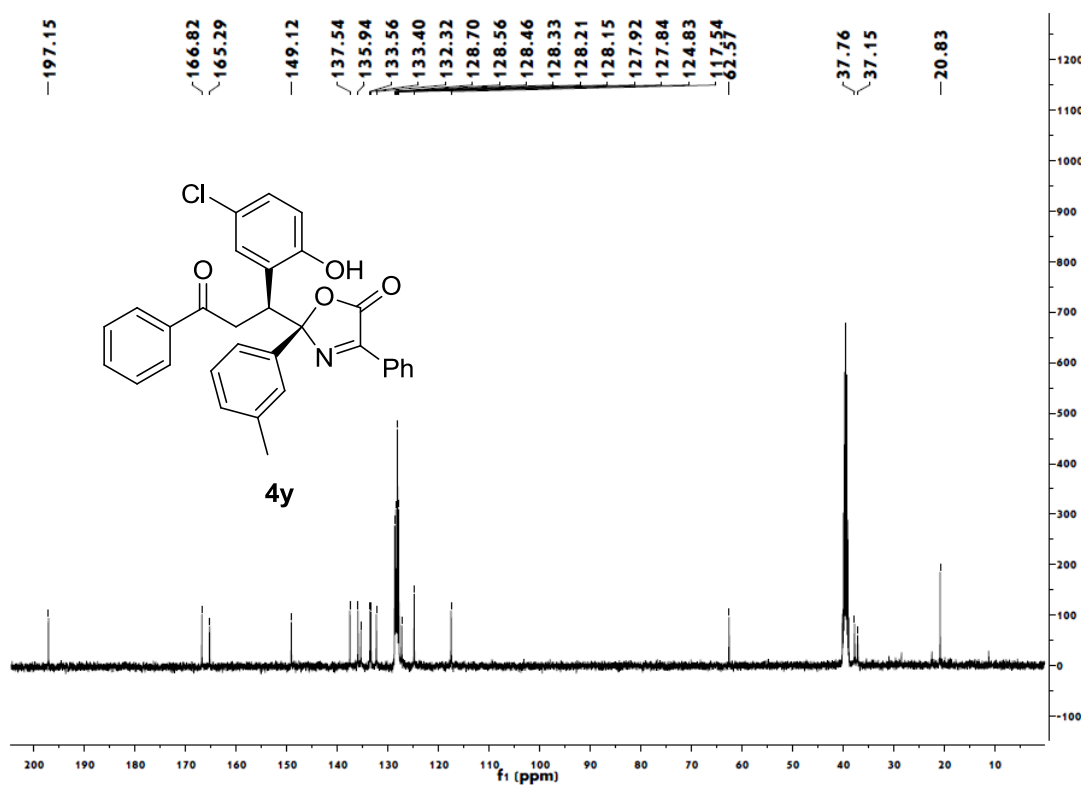

**(R)-2-(tert-butyl)-2-((S)-1-(5-chloro-2-hydroxyphenyl)-3-oxo-3-phenylpropyl)-4-phenyloxazol-5(2H)-one 4z:**

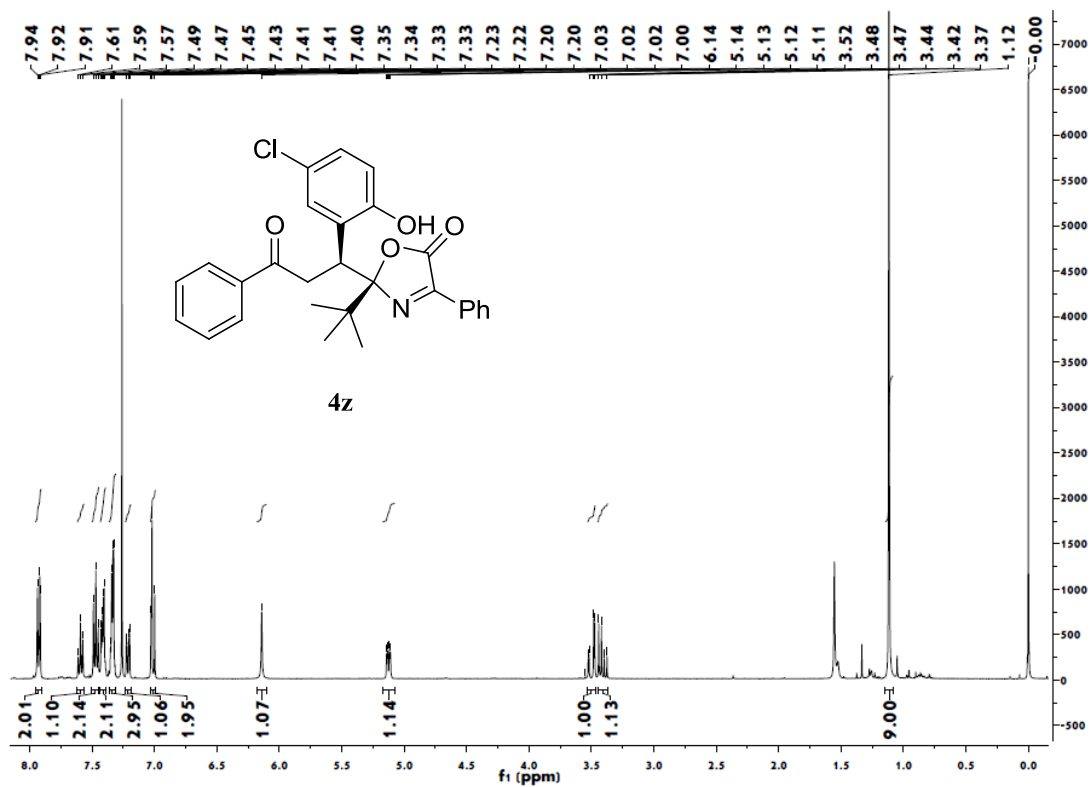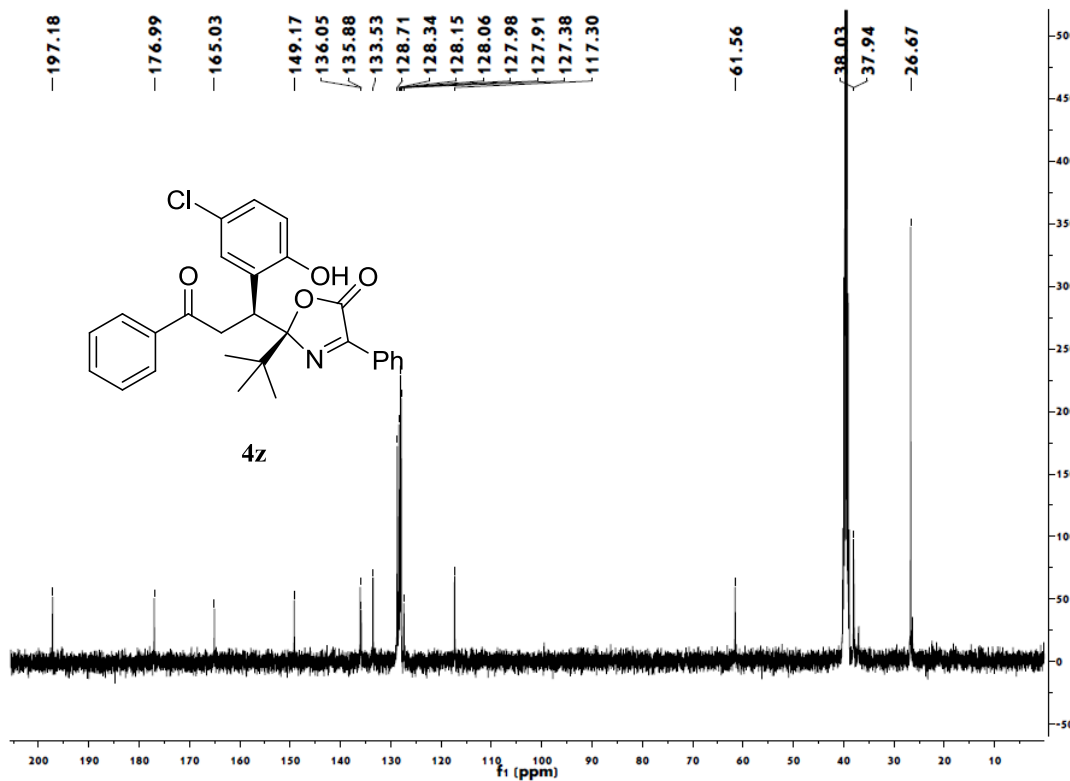

**2-(1-(3-bromo-5-chloro-2-hydroxyphenyl)-3-oxo-3-phenylpropyl)-2,4-diphenyloxazol-5(2H)-one *rac-5a*:**

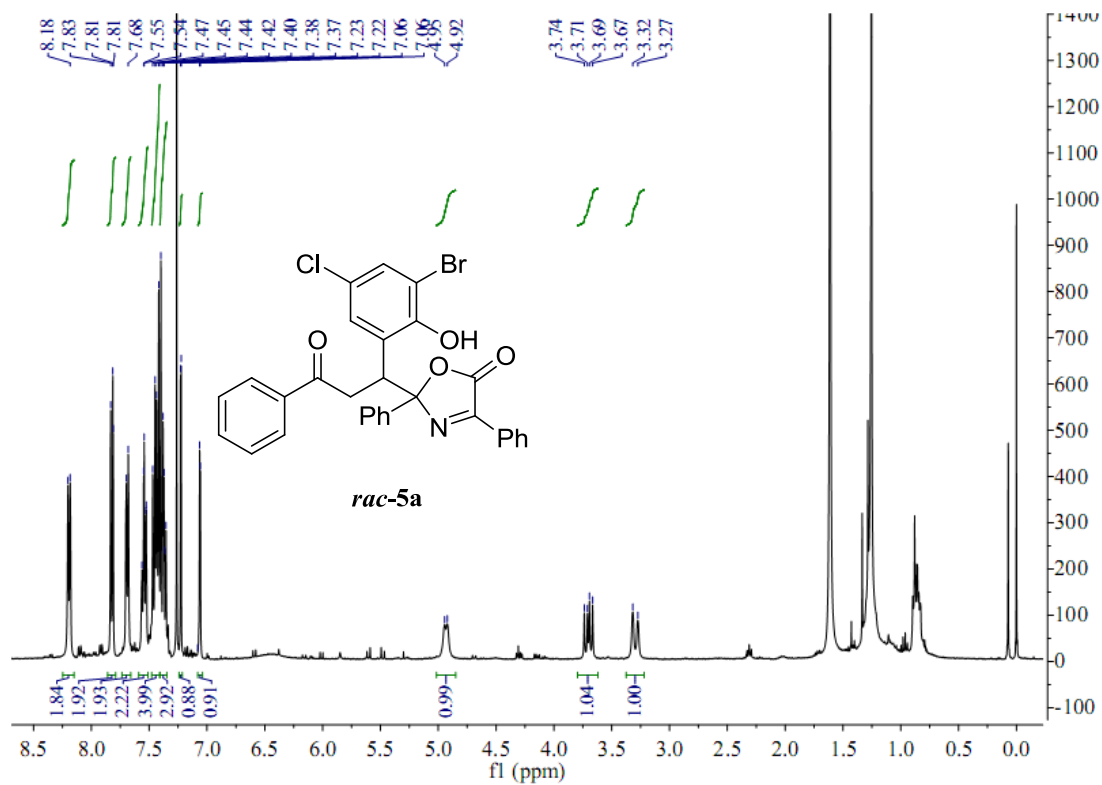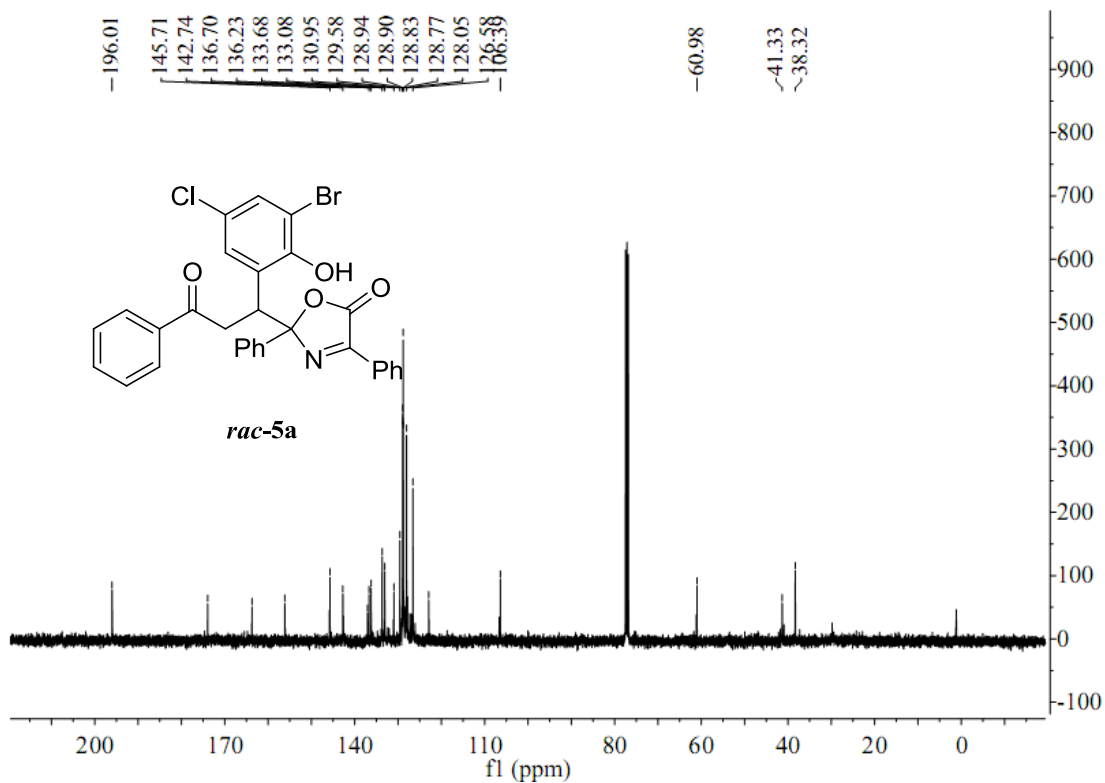

#### 4.HPLC spectra

##### Mixture of C-2 product and C-4 product

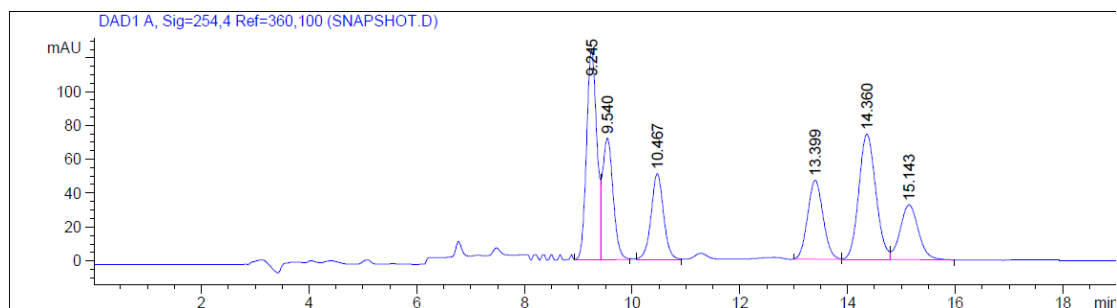

| Peak # | RetTime [min] | Type | Width [min] | Area [mAU*s] | Height [mAU] | Area %  |
|--------|---------------|------|-------------|--------------|--------------|---------|
| 1      | 9.245         | VV   | 0.2017      | 1636.96118   | 124.24503    | 24.2015 |
| 2      | 9.540         | VB   | 0.2077      | 996.75897    | 71.90916     | 14.7365 |
| 3      | 10.467        | BB   | 0.2448      | 812.89142    | 50.76087     | 12.0181 |
| 4      | 13.399        | BV   | 0.3092      | 922.57697    | 46.56130     | 13.6397 |
| 5      | 14.360        | VV   | 0.3429      | 1630.28418   | 74.03719     | 24.1027 |
| 6      | 15.143        | VB   | 0.3629      | 764.42072    | 32.44015     | 11.3015 |

Totals : 6763.89343 399.95369

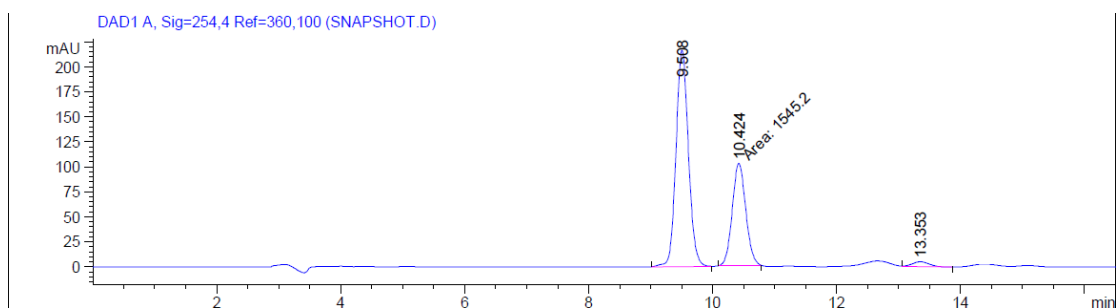

| Peak # | RetTime [min] | Type | Width [min] | Area [mAU*s] | Height [mAU] | Area %  |
|--------|---------------|------|-------------|--------------|--------------|---------|
| 1      | 9.508         | BB   | 0.2148      | 3020.81812   | 216.52130    | 64.7975 |
| 2      | 10.424        | MM   | 0.2514      | 1545.19958   | 102.42629    | 33.1450 |
| 3      | 13.353        | VB   | 0.3035      | 95.92062     | 4.96165      | 2.0575  |

Totals : 4661.93832 323.90924

**(2R,3S)-methyl 2-benzamido-5-oxo-2,3,5-triphenylpentanoate A:**

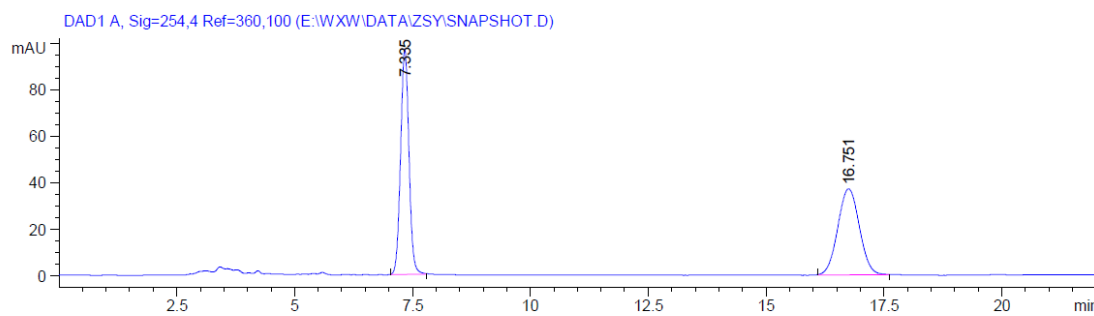

| Peak # | RetTime [min] | Type | Width [min] | Area [mAU*s] | Height [mAU] | Area %  |
|--------|---------------|------|-------------|--------------|--------------|---------|
| 1      | 7.335         | BB   | 0.1894      | 1189.15381   | 96.75109     | 50.1653 |
| 2      | 16.751        | BB   | 0.5014      | 1181.31555   | 37.10787     | 49.8347 |

Totals : 2370.46936 133.85896

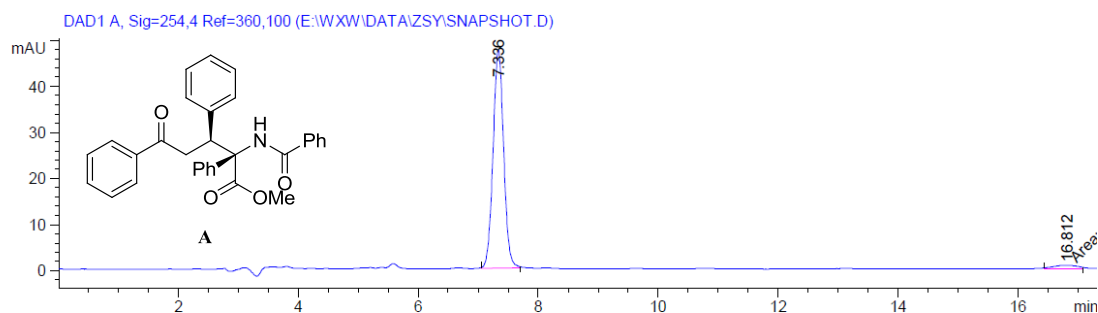

| Peak # | RetTime [min] | Type | Width [min] | Area [mAU*s] | Height [mAU] | Area %  |
|--------|---------------|------|-------------|--------------|--------------|---------|
| 1      | 7.336         | BB   | 0.1893      | 582.09430    | 47.37637     | 96.5898 |
| 2      | 16.812        | MM   | 0.4582      | 20.55163     | 7.47554e-1   | 3.4102  |

Totals : 602.64593 48.12392

**(R)-2-((S)-3-oxo-1,3-diphenylpropyl)-2,4-diphenyloxazol-5(2H)-one B:**

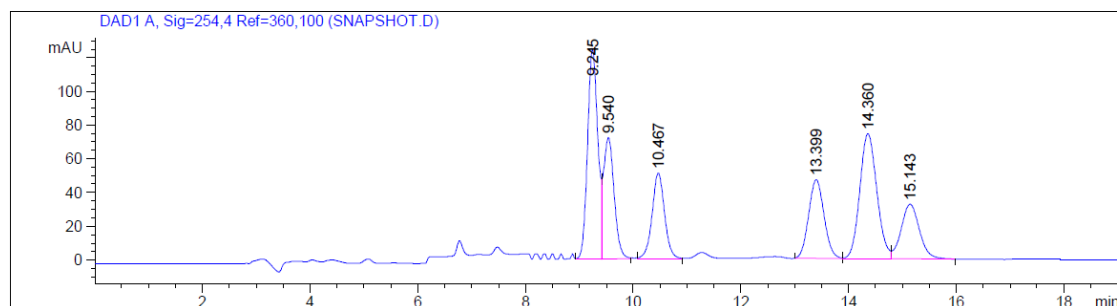



| Peak # | RetTime [min] | Type | Width [min] | Area [mAU*s] | Height [mAU] | Area %  |
|--------|---------------|------|-------------|--------------|--------------|---------|
| 1      | 9.245         | VV   | 0.2017      | 1636.96118   | 124.24503    | 24.2015 |
| 2      | 9.540         | VB   | 0.2077      | 996.75897    | 71.90916     | 14.7365 |
| 3      | 10.467        | BB   | 0.2448      | 812.89142    | 50.76087     | 12.0181 |
| 4      | 13.399        | BV   | 0.3092      | 922.57697    | 46.56130     | 13.6397 |
| 5      | 14.360        | VV   | 0.3429      | 1630.28418   | 74.03719     | 24.1027 |
| 6      | 15.143        | VB   | 0.3629      | 764.42072    | 32.44015     | 11.3015 |

Totals : 6763.89343 399.95369

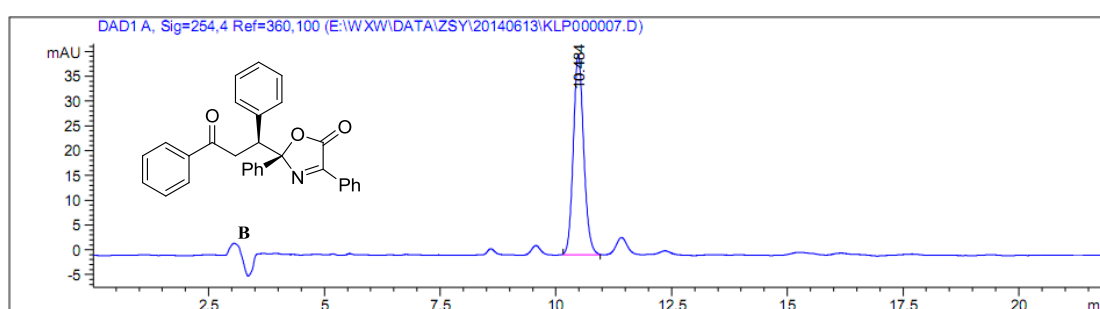

| Peak # | RetTime [min] | Type | Width [min] | Area [mAU*s] | Height [mAU] | Area %   |
|--------|---------------|------|-------------|--------------|--------------|----------|
| 1      | 10.484        | BB   | 0.2376      | 629.29883    | 40.43816     | 100.0000 |

Totals : 629.29883 40.43816

**(R)-2-((S)-1-(5-chloro-2-hydroxyphenyl)-3-oxo-3-phenylpropyl)-2,4-diphenyloxazol-5(2H)-one 4a:**

DAD1 A, Sig=254,4 Ref=360,100 (E:\WXW\DATA\ZSY\20130523\HXF000007.D)

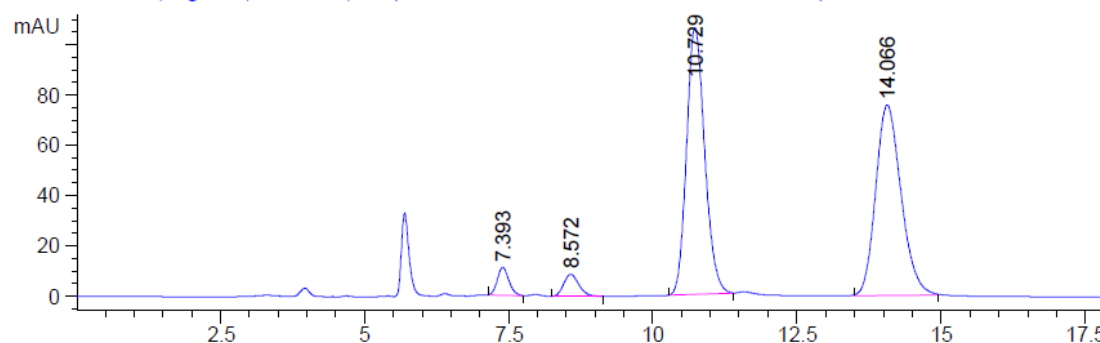

| Peak # | RetTime [min] | Type | Width [min] | Area [mAU*s] | Height [mAU] | Area %  |
|--------|---------------|------|-------------|--------------|--------------|---------|
| 1      | 7.393         | BB   | 0.2151      | 156.11209    | 11.16907     | 3.1447  |
| 2      | 8.572         | BB   | 0.2806      | 160.36469    | 8.80148      | 3.2303  |
| 3      | 10.729        | BB   | 0.3394      | 2323.28784   | 106.12003    | 46.7994 |
| 4      | 14.066        | BB   | 0.4698      | 2324.58911   | 75.79112     | 46.8256 |

Totals : 4964.35373 201.88169

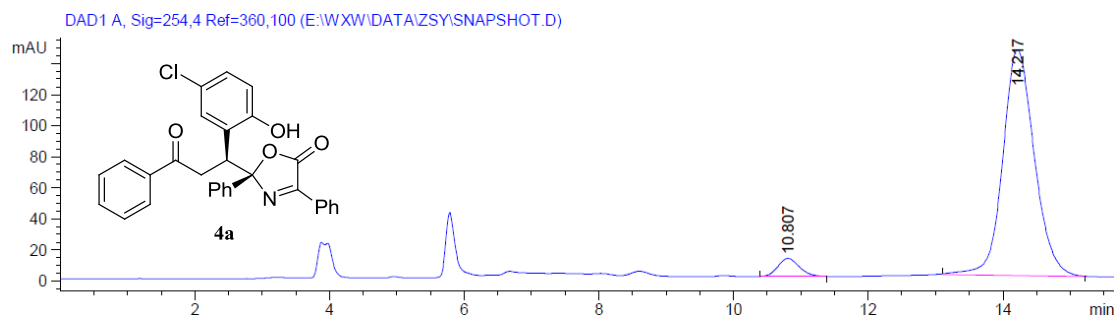

| Peak # | RetTime [min] | Type | Width [min] | Area [mAU*s] | Height [mAU] | Area %  |
|--------|---------------|------|-------------|--------------|--------------|---------|
| 1      | 10.807        | BB   | 0.3415      | 257.74921    | 11.58993     | 5.1474  |
| 2      | 14.217        | BB   | 0.4988      | 4749.65039   | 145.49837    | 94.8526 |

Totals : 5007.39960 157.08830

**(R)-2-((S)-1-(5-chloro-2-hydroxyphenyl)-3-(4-fluorophenyl)-3-oxopropyl)-2,4-diphenyloxazol-5(2H)-one 4b:**

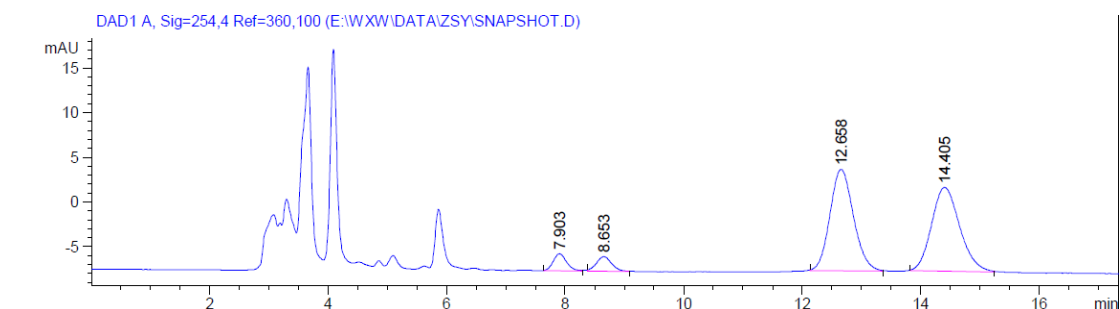

| Peak # | RetTime [min] | Type | Width [min] | Area [mAU*s] | Height [mAU] | Area %  |
|--------|---------------|------|-------------|--------------|--------------|---------|
| 1      | 7.903         | BB   | 0.2379      | 28.98868     | 1.88017      | 4.2617  |
| 2      | 8.653         | BB   | 0.2709      | 28.62154     | 1.61403      | 4.2077  |
| 3      | 12.658        | BB   | 0.4276      | 312.93030    | 11.35363     | 46.0044 |
| 4      | 14.405        | BB   | 0.5034      | 309.67767    | 9.37552      | 45.5262 |

Totals : 680.21819 24.22335

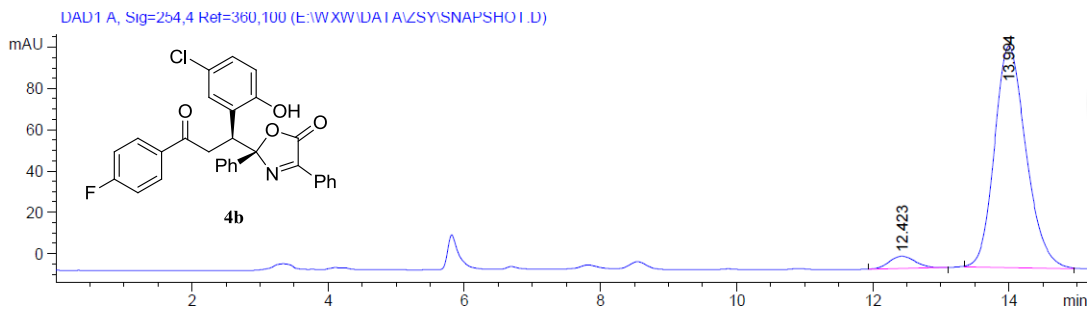

| Peak # | RetTime [min] | Type | Width [min] | Area [mAU*s] | Height [mAU] | Area %  |
|--------|---------------|------|-------------|--------------|--------------|---------|
| 1      | 12.423        | BB   | 0.3994      | 157.69139    | 5.98418      | 4.3659  |
| 2      | 13.994        | BB   | 0.4951      | 3454.18750   | 107.43208    | 95.6341 |

Totals : 3611.87889 113.41626

**(R)-2-((S)-3-(4-bromophenyl)-1-(5-chloro-2-hydroxyphenyl)-3-oxopropyl)-2,4-diphenyloxazole-5(2H)-one 4c:**

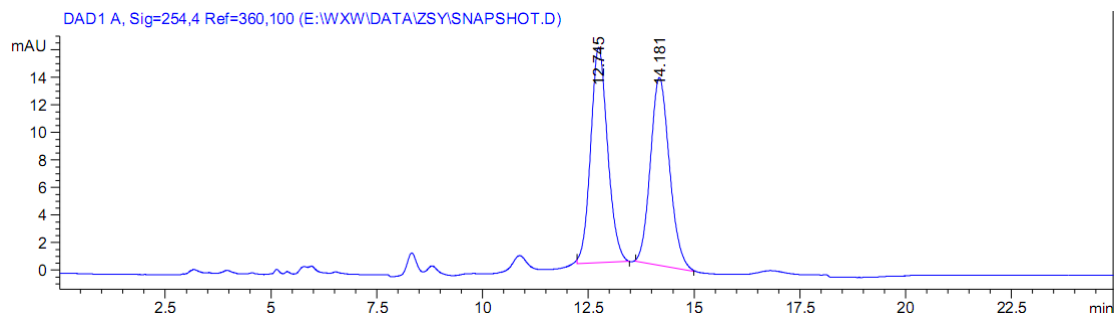

Signal 1: DAD1 A, Sig=254,4 Ref=360,100

| Peak # | RetTime [min] | Type | Width [min] | Area [mAU*s] | Height [mAU] | Area %  |
|--------|---------------|------|-------------|--------------|--------------|---------|
| 1      | 12.745        | BB   | 0.4270      | 435.43790    | 15.62962     | 50.4425 |
| 2      | 14.181        | BB   | 0.4777      | 427.79837    | 13.64821     | 49.5575 |

Totals : 863.23627 29.27783

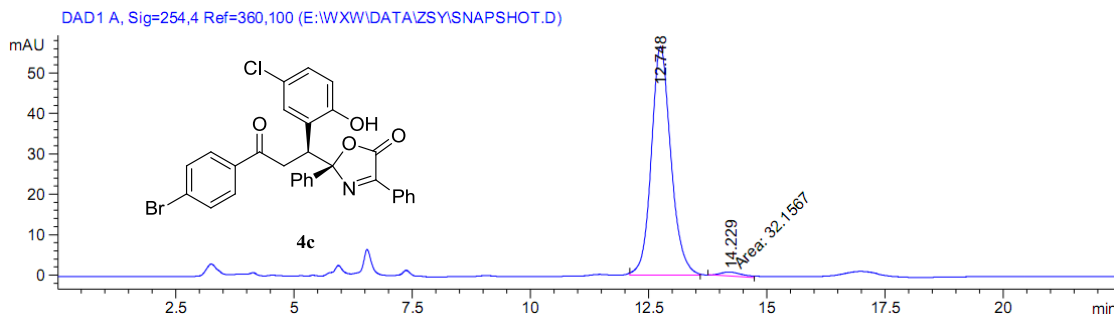

Signal 1: DAD1 A, Sig=254,4 Ref=360,100

| Peak # | RetTime [min] | Type | Width [min] | Area [mAU*s] | Height [mAU] | Area %  |
|--------|---------------|------|-------------|--------------|--------------|---------|
| 1      | 12.748        | BB   | 0.4376      | 1626.25623   | 56.53669     | 98.0610 |
| 2      | 14.229        | MM   | 0.5411      | 32.15672     | 9.90514e-1   | 1.9390  |

Totals : 1658.41295 57.52720

**(R)-2-((S)-1-(5-chloro-2-hydroxyphenyl)-3-(4-iodophenyl)-3-oxopropyl)-2,4-diphenyloxazol-5(2H)-one 4d:**

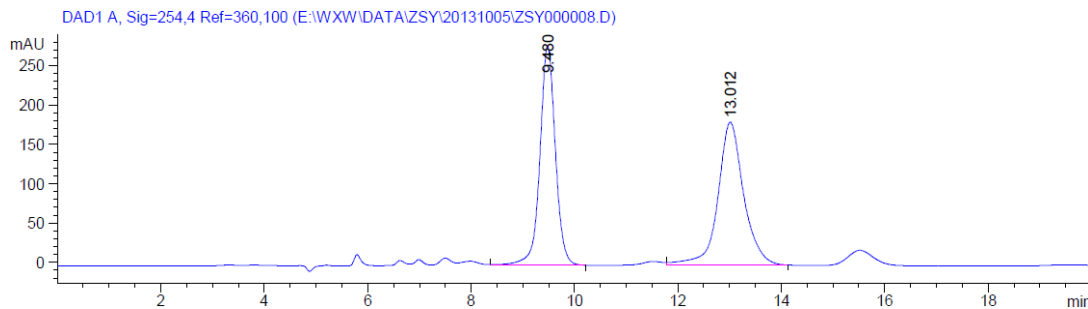

| Peak # | RetTime [min] | Type | Width [min] | Area [mAU*s] | Height [mAU] | Area %  |
|--------|---------------|------|-------------|--------------|--------------|---------|
| 1      | 9.480         | VB   | 0.3179      | 5831.68799   | 278.97940    | 48.0449 |
| 2      | 13.012        | VB   | 0.5129      | 6306.29736   | 181.69740    | 51.9551 |

Totals : 1.21380e4 460.67680

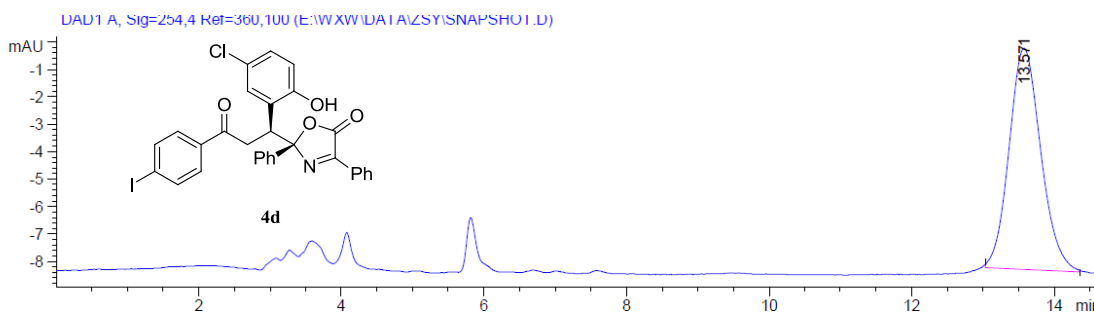

| Peak # | RetTime [min] | Type | Width [min] | Area [mAU*s] | Height [mAU] | Area %   |
|--------|---------------|------|-------------|--------------|--------------|----------|
| 1      | 13.571        | BB   | 0.4616      | 248.61864    | 8.06566      | 100.0000 |

Totals : 248.61864 8.06566

**(R)-2-((S)-1-(5-chloro-2-hydroxyphenyl)-3-oxo-3-(4-(trifluoromethyl)phenyl)propyl)-2,4-diphenyloxazol-5(2H)-one 4e:**

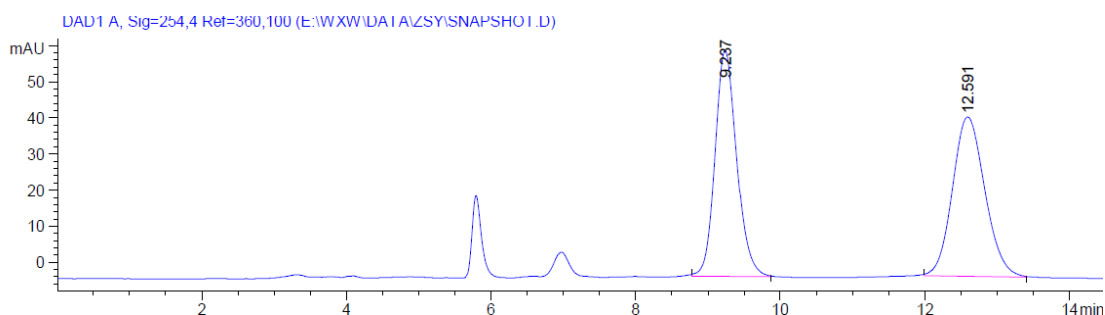

Signal 1: DAD1 A, Sig=254,4 Ref=360,100

| Peak # | RetTime [min] | Type | Width [min] | Area [mAU*s] | Height [mAU] | Area %  |
|--------|---------------|------|-------------|--------------|--------------|---------|
| 1      | 9.237         | BB   | 0.3197      | 1306.43262   | 62.54980     | 48.8353 |
| 2      | 12.591        | BB   | 0.4784      | 1368.74731   | 44.06165     | 51.1647 |

Totals : 2675.17993 106.61146

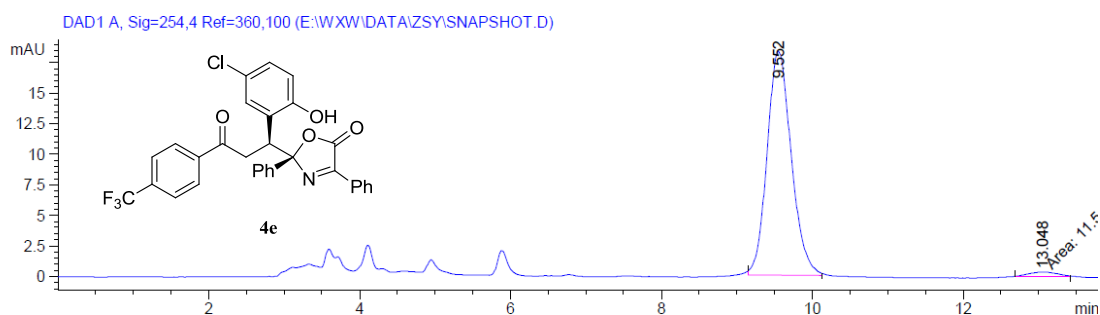

| Peak # | RetTime [min] | Type | Width [min] | Area [mAU*s] | Height [mAU] | Area %  |
|--------|---------------|------|-------------|--------------|--------------|---------|
| 1      | 9.552         | BB   | 0.3421      | 408.48004    | 18.31945     | 97.2573 |
| 2      | 13.048        | MM   | 0.4733      | 11.51925     | 4.05628e-1   | 2.7427  |

Totals : 419.99930 18.72508

**(R)-2-((S)-3-(4-(tert-butyl)phenyl)-1-(5-chloro-2-hydroxyphenyl)-3-oxopropyl)-2,4-diphenylloxazol-5(2H)-one 4f:**

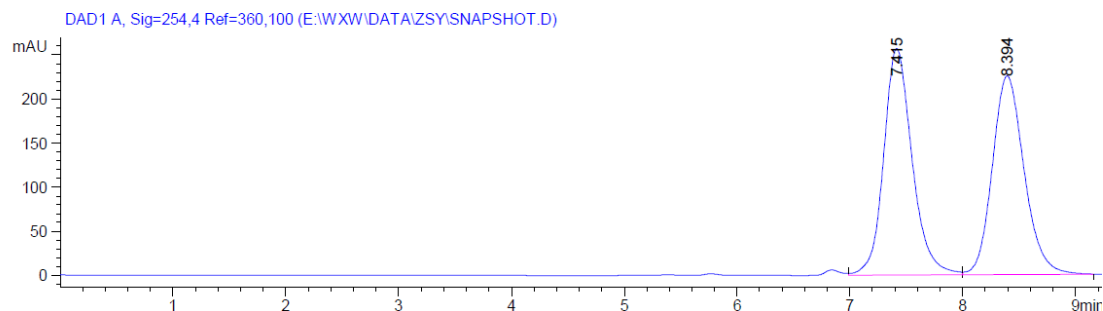

| Peak # | RetTime [min] | Type | Width [min] | Area [mAU*s] | Height [mAU] | Area %  |
|--------|---------------|------|-------------|--------------|--------------|---------|
| 1      | 7.415         | VV   | 0.2667      | 4505.39502   | 256.74716    | 50.4922 |
| 2      | 8.394         | VB   | 0.3007      | 4417.55664   | 225.37447    | 49.5078 |

Totals : 8922.95166 482.12163

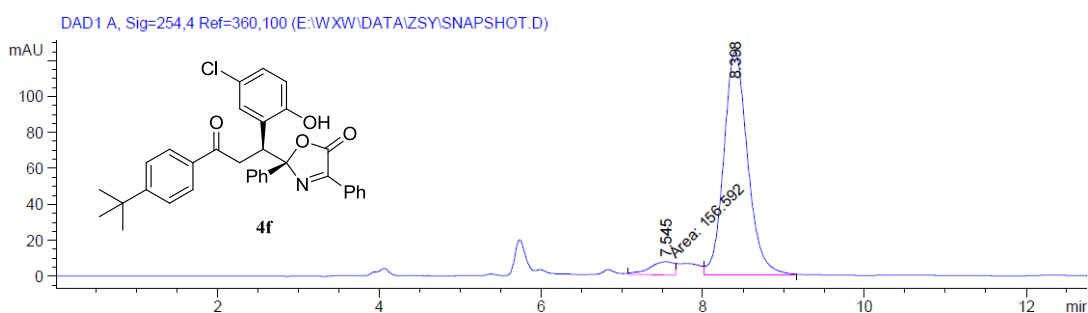

| Peak # | RetTime [min] | Type | Width [min] | Area [mAU*s] | Height [mAU] | Area %  |
|--------|---------------|------|-------------|--------------|--------------|---------|
| 1      | 7.518         | MM   | 0.2894      | 298.04272    | 17.16557     | 5.1118  |
| 2      | 8.398         | VB   | 0.3206      | 5532.45410   | 261.69754    | 94.8882 |

Totals : 5830.49683 278.86311

**(R)-2-((S)-3-([1,1'-biphenyl]-4-yl)-1-(5-chloro-2-hydroxyphenyl)-3-oxopropyl)-2,4-diphenylloxazol-5(2H)-one 4g:**

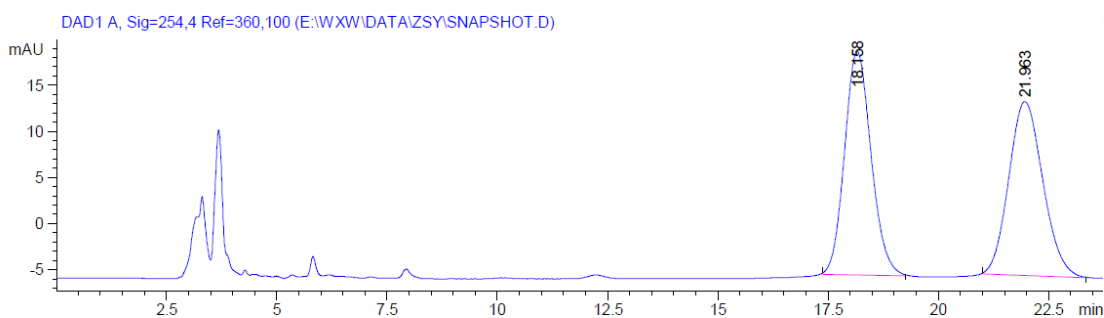

| Peak # | RetTime [min] | Type | Width [min] | Area [mAU*s] | Height [mAU] | Area %  |
|--------|---------------|------|-------------|--------------|--------------|---------|
| 1      | 18.158        | BB   | 0.6439      | 1012.84735   | 24.21730     | 50.0497 |
| 2      | 21.963        | BB   | 0.8168      | 1010.83740   | 18.81401     | 49.9503 |

Totals : 2023.68475 43.03132

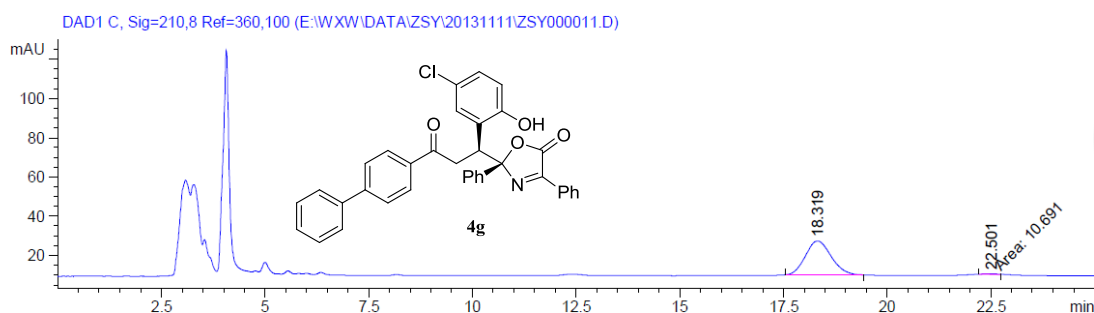

| Peak # | RetTime [min] | Type | Width [min] | Area [mAU*s] | Height [mAU] | Area %  |
|--------|---------------|------|-------------|--------------|--------------|---------|
| 1      | 18.319        | BB   | 0.6587      | 764.00110    | 17.45240     | 98.6200 |
| 2      | 22.501        | MM   | 0.4260      | 10.69103     | 4.18257e-1   | 1.3800  |

Totals : 774.69213 17.87066

**(R)-2-((S)-1-(5-chloro-2-hydroxyphenyl)-3-oxo-3-(4-pentylphenyl)propyl)-2,4-diphenyloxazol-5(2H)-one 4h:**

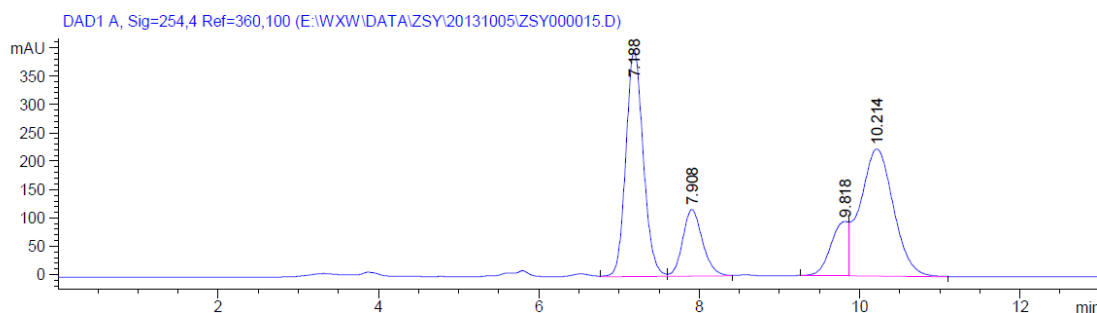

| Peak # | RetTime [min] | Type | Width [min] | Area [mAU*s] | Height [mAU] | Area %  |
|--------|---------------|------|-------------|--------------|--------------|---------|
| 1      | 7.188         | VV   | 0.2313      | 6000.66748   | 399.24829    | 37.5849 |
| 2      | 7.908         | VB   | 0.2632      | 2028.69299   | 117.60777    | 12.7066 |
| 3      | 9.818         | BV   | 0.2373      | 1455.97253   | 95.81074     | 9.1194  |
| 4      | 10.214        | VB   | 0.4326      | 6480.29883   | 224.58270    | 40.5891 |

Totals : 1.59656e4 837.24950

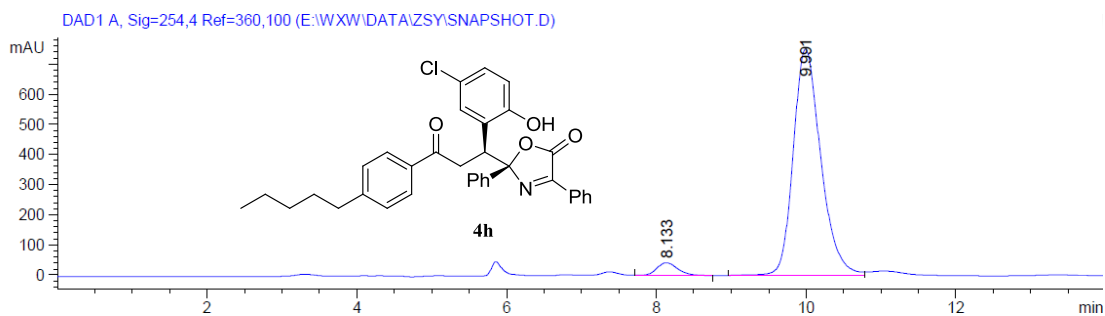

| Peak # | RetTime [min] | Type | Width [min] | Area [mAU*s] | Height [mAU] | Area %  |
|--------|---------------|------|-------------|--------------|--------------|---------|
| 1      | 8.133         | VB   | 0.3095      | 903.14673    | 43.98979     | 4.4459  |
| 2      | 9.991         | BV   | 0.3929      | 1.94108e4    | 752.71051    | 95.5541 |

Totals : 2.03139e4 796.70030

**(R)-2-((S)-1-(5-chloro-2-hydroxyphenyl)-3-(3-fluorophenyl)-3-oxopropyl)-2,4-diphenyloxazol-5(2H)-one 4i:**

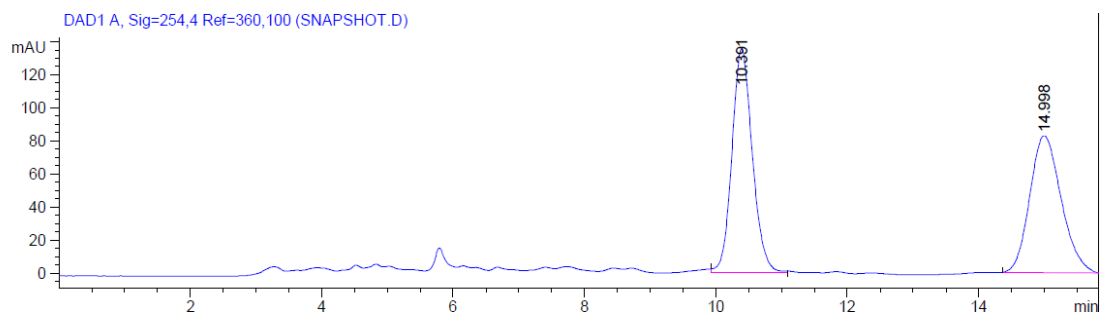

| Peak # | RetTime [min] | Type | Width [min] | Area [mAU*s] | Height [mAU] | Area %  |
|--------|---------------|------|-------------|--------------|--------------|---------|
| 1      | 10.391        | BB   | 0.3318      | 2912.35791   | 134.95784    | 51.3595 |
| 2      | 14.998        | BBA  | 0.5159      | 2758.17505   | 82.94743     | 48.6405 |

Totals : 5670.53296 217.90527

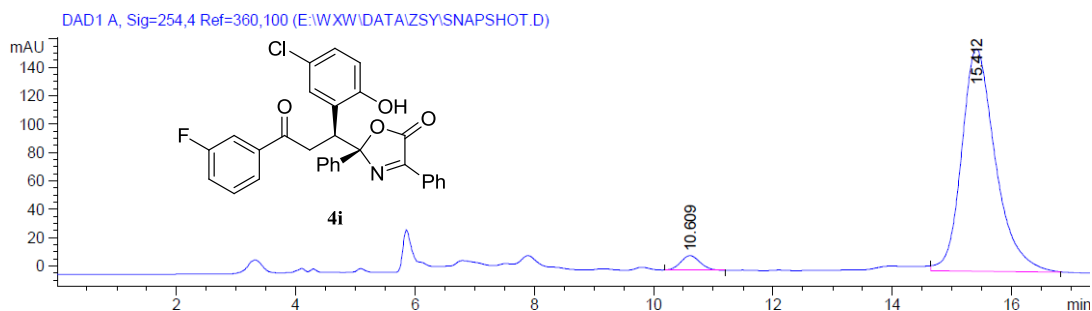



| Peak # | RetTime [min] | Type | Width [min] | Area [mAU*s] | Height [mAU] | Area %  |
|--------|---------------|------|-------------|--------------|--------------|---------|
| 1      | 10.609        | BB   | 0.3474      | 229.39139    | 10.23819     | 3.5867  |
| 2      | 15.412        | BB   | 0.5974      | 6166.27197   | 156.60374    | 96.4133 |

Totals : 6395.66336 166.84193

**(R)-2-((S)-1-(5-chloro-2-hydroxyphenyl)-3-(3-chlorophenyl)-3-oxopropyl)-2,4-diphenyloxazole-1-oxide 4j:**

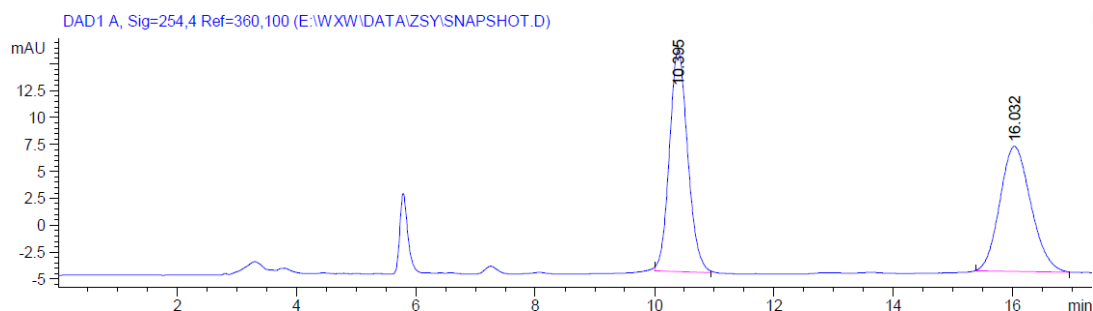

| Peak # | RetTime [min] | Type | Width [min] | Area [mAU*s] | Height [mAU] | Area %  |
|--------|---------------|------|-------------|--------------|--------------|---------|
| 1      | 10.395        | BB   | 0.3278      | 437.18451    | 20.58600     | 50.9853 |
| 2      | 16.032        | BB   | 0.5477      | 420.28717    | 11.62799     | 49.0147 |

Totals : 857.47168 32.21399

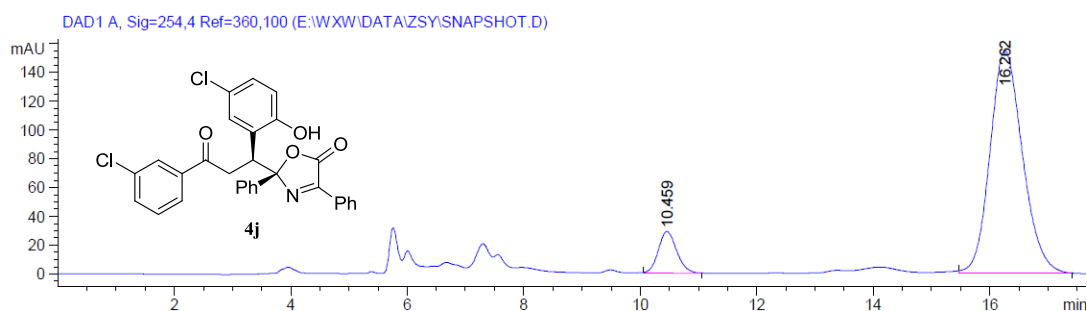

| Peak # | RetTime [min] | Type | Width [min] | Area [mAU*s] | Height [mAU] | Area %  |
|--------|---------------|------|-------------|--------------|--------------|---------|
| 1      | 10.459        | BB   | 0.3393      | 639.25317    | 28.98220     | 9.6128  |
| 2      | 16.262        | BB   | 0.5972      | 6010.73486   | 154.72745    | 90.3872 |

Totals : 6649.98804 183.70965

**(R)-2-((S)-1-(5-chloro-2-hydroxyphenyl)-3-(2-fluorophenyl)-3-oxopropyl)-2,4-diphenyloxazol-5(2H)-one 4k:**

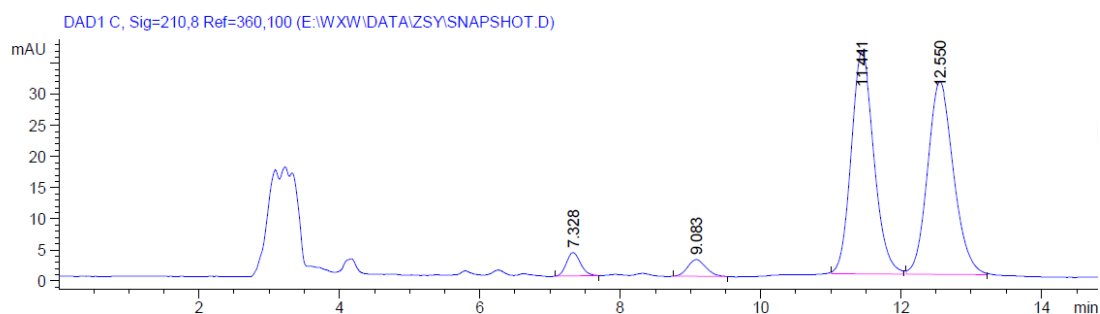

| Peak # | RetTime [min] | Type | Width [min] | Area [mAU*s] | Height [mAU] | Area %  |
|--------|---------------|------|-------------|--------------|--------------|---------|
| 1      | 7.328         | BB   | 0.2098      | 51.40912     | 3.75279      | 3.0150  |
| 2      | 9.083         | BB   | 0.2707      | 48.73916     | 2.69919      | 2.8584  |
| 3      | 11.441        | BB   | 0.3450      | 808.07220    | 35.85072     | 47.3909 |
| 4      | 12.550        | BB   | 0.3958      | 796.90112    | 31.01489     | 46.7357 |

Totals : 1705.12161 73.31759

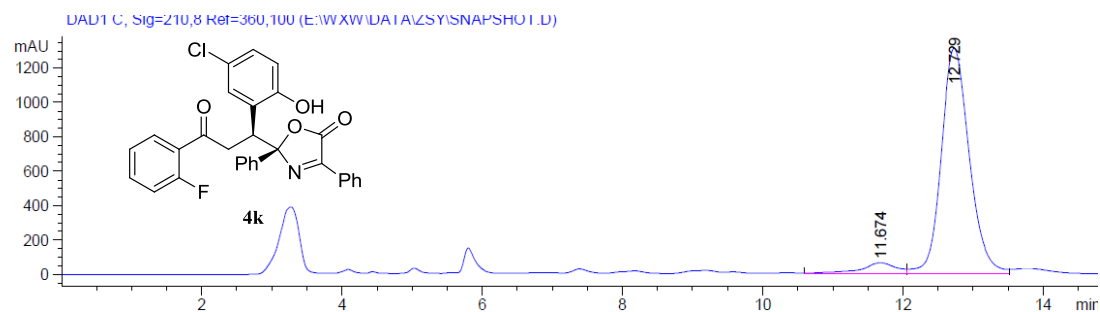

| Peak # | RetTime [min] | Type | Width [min] | Area [mAU*s] | Height [mAU] | Area %  |
|--------|---------------|------|-------------|--------------|--------------|---------|
| 1      | 11.649        | VV   | 0.5795      | 673.79822    | 15.86538     | 8.1261  |
| 2      | 12.729        | VV   | 0.4246      | 7617.94287   | 273.80069    | 91.8739 |

Totals : 8291.74109 289.66607

**(R)-2-((S)-1-(5-chloro-2-hydroxyphenyl)-3-(3,4-difluorophenyl)-3-oxopropyl)-2,4-diphenyloxazol-5(2H)-one 4l:**

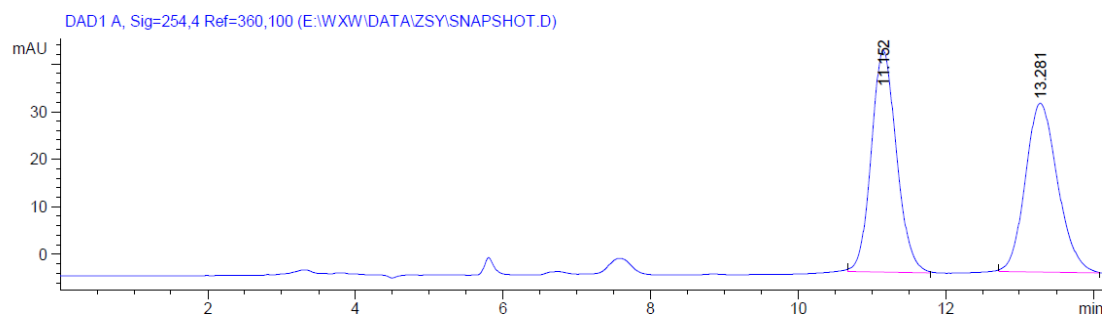

| Peak # | RetTime [min] | Type | Width [min] | Area [mAU*s] | Height [mAU] | Area %  |
|--------|---------------|------|-------------|--------------|--------------|---------|
| 1      | 11.152        | BB   | 0.3650      | 1107.30457   | 46.63414     | 50.5840 |
| 2      | 13.281        | BB   | 0.4689      | 1081.73523   | 35.56060     | 49.4160 |

Totals : 2189.03979 82.19474

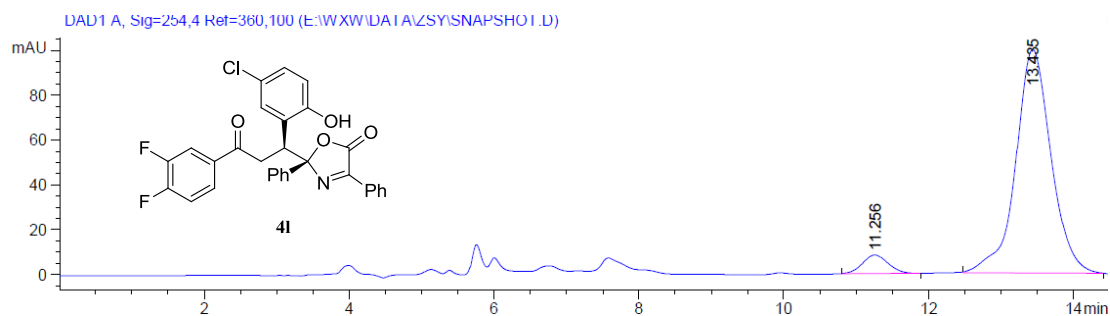

| Peak # | RetTime [min] | Type | Width [min] | Area [mAU*s] | Height [mAU] | Area %  |
|--------|---------------|------|-------------|--------------|--------------|---------|
| 1      | 11.256        | BB   | 0.3846      | 204.26151    | 8.25716      | 5.6864  |
| 2      | 13.435        | BB   | 0.5146      | 3387.85034   | 99.65593     | 94.3136 |

Totals : 3592.11185 107.91309

**(R)-2-((S)-1-(5-chloro-2-hydroxyphenyl)-3-(furan-2-yl)-3-oxopropyl)-2,4-diphenyloxazol-5(2H)-one 4m:**

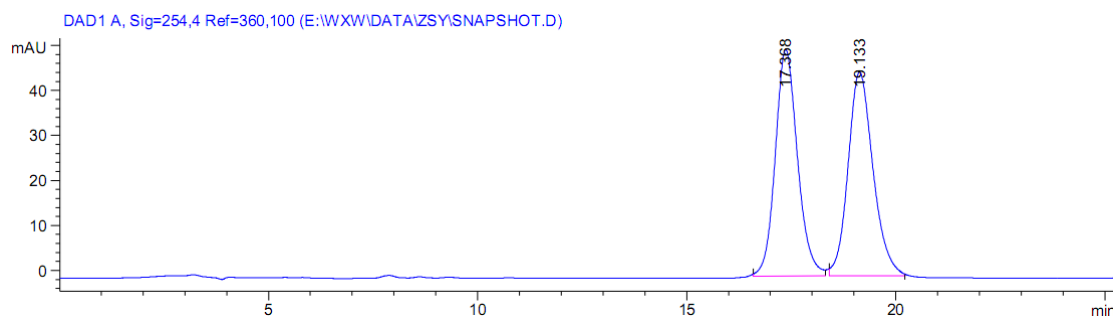

Signal 1: DAD1 A, Sig=254,4 Ref=360,100

| Peak # | RetTime [min] | Type | Width [min] | Area [mAU*s] | Height [mAU] | Area %  |
|--------|---------------|------|-------------|--------------|--------------|---------|
| 1      | 17.368        | BB   | 0.5668      | 1860.26318   | 50.37998     | 49.7461 |
| 2      | 19.133        | BB   | 0.6300      | 1879.24963   | 45.29940     | 50.2539 |

Totals : 3739.51282 95.67938

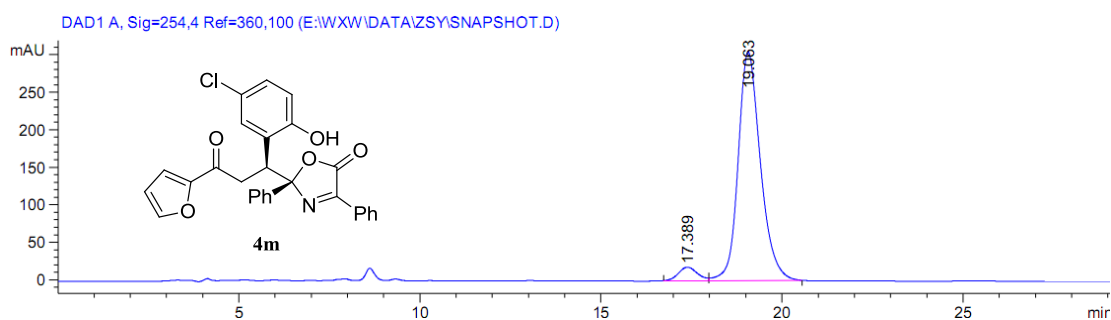

Signal 1: DAD1 A, Sig=254,4 Ref=360,100

| Peak # | RetTime [min] | Type | Width [min] | Area [mAU*s] | Height [mAU] | Area %  |
|--------|---------------|------|-------------|--------------|--------------|---------|
| 1      | 17.389        | BV   | 0.5568      | 659.62708    | 18.11646     | 4.8331  |
| 2      | 19.063        | VB   | 0.6449      | 1.29884e4    | 304.92648    | 95.1669 |

Totals : 1.36481e4 323.04294

**(R)-2-((S)-1-(5-chloro-2-hydroxyphenyl)-3-oxo-3-(thiophen-2-yl)propyl)-2,4-diphenyloxazol-5(2H)-one 4n:**

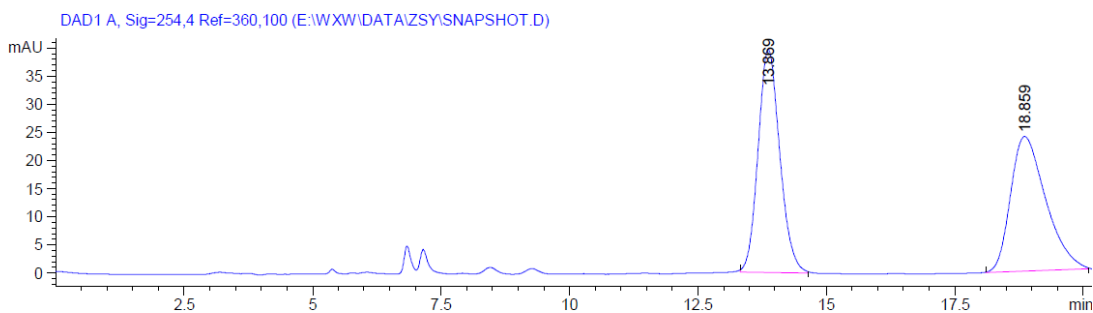

| Peak # | RetTime [min] | Type | Width [min] | Area [mAU*s] | Height [mAU] | Area %  |
|--------|---------------|------|-------------|--------------|--------------|---------|
| 1      | 13.869        | BB   | 0.4516      | 1161.77478   | 39.68060     | 50.4949 |
| 2      | 18.859        | BB   | 0.7087      | 1139.00037   | 23.95658     | 49.5051 |

Totals : 2300.77515 63.63718

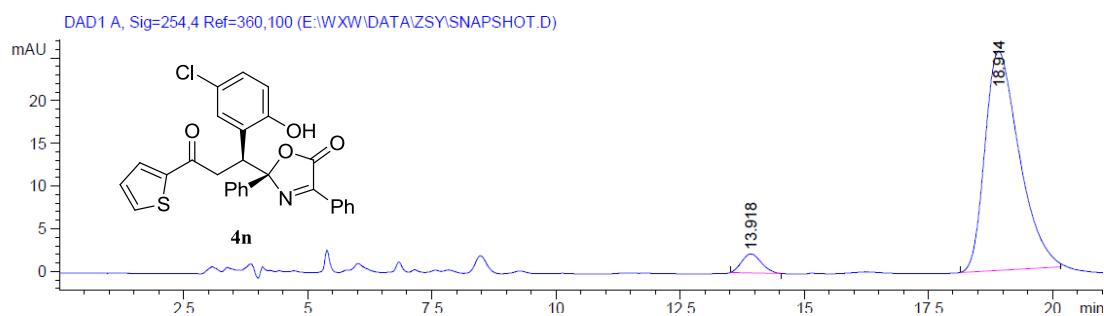

| Peak # | RetTime [min] | Type | Width [min] | Area [mAU*s] | Height [mAU] | Area %  |
|--------|---------------|------|-------------|--------------|--------------|---------|
| 1      | 13.918        | BB   | 0.4165      | 62.80612     | 2.24437      | 4.8496  |
| 2      | 18.914        | BB   | 0.7220      | 1232.26538   | 25.67003     | 95.1504 |

Totals : 1295.07150 27.91440

**(R)-2-((R)-1-(2-hydroxyphenyl)-3-oxobutyl)-2,4-diphenyloxazol-5(2H)-one 4o:**

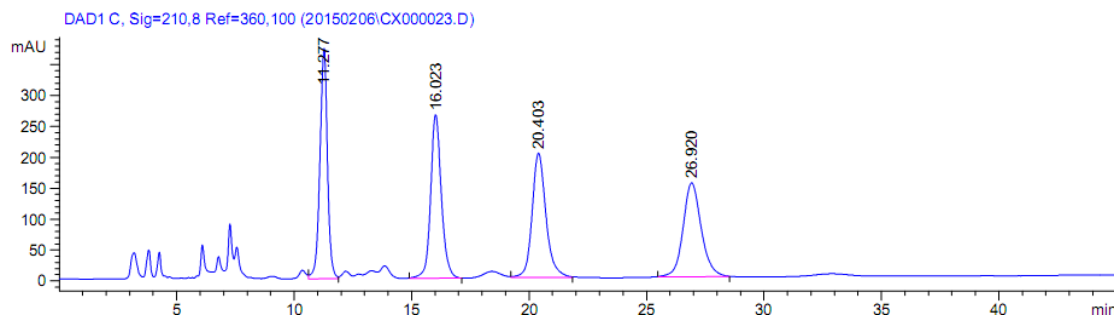

Signal 2: DAD1 C, Sig=210,8 Ref=360,100

| Peak # | RetTime [min] | Type | Width [min] | Area [mAU*s] | Height [mAU] | Area %  |
|--------|---------------|------|-------------|--------------|--------------|---------|
| 1      | 11.277        | VV   | 0.3382      | 8305.47363   | 372.35892    | 25.0200 |
| 2      | 16.023        | BB   | 0.4797      | 8388.65332   | 264.75119    | 25.2706 |
| 3      | 20.403        | VB   | 0.6224      | 8278.40820   | 201.03572    | 24.9385 |
| 4      | 26.920        | BB   | 0.8199      | 8222.81738   | 152.29443    | 24.7710 |

Totals : 3.31954e4 990.44026

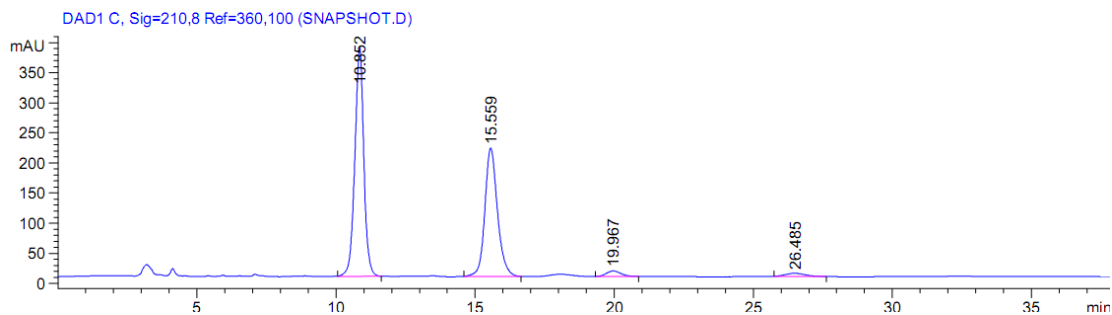

| Peak # | RetTime [min] | Type | Width [min] | Area [mAU*s] | Height [mAU] | Area %  |
|--------|---------------|------|-------------|--------------|--------------|---------|
| 1      | 10.852        | BB   | 0.3422      | 8531.89453   | 379.59662    | 53.5308 |
| 2      | 15.559        | BB   | 0.4793      | 6769.18359   | 213.82991    | 42.4712 |
| 3      | 19.967        | BB   | 0.5668      | 346.85751    | 9.22258      | 2.1763  |
| 4      | 26.485        | BB   | 0.7716      | 290.36166    | 5.55714      | 1.8218  |

**(R)-2-((S)-1-(2-hydroxyphenyl)-3-oxo-3-phenylpropyl)-2,4-diphenyloxazol-5(2H)-one 4p:**

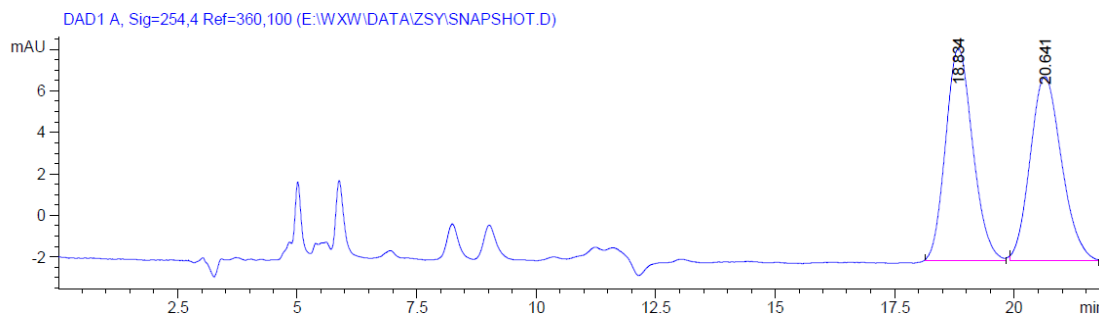

| Peak # | RetTime [min] | Type | Width [min] | Area [mAU*s] | Height [mAU] | Area %  |
|--------|---------------|------|-------------|--------------|--------------|---------|
| 1      | 18.834        | BB   | 0.5988      | 405.75568    | 10.22869     | 50.0549 |
| 2      | 20.641        | BB   | 0.6722      | 404.86493    | 8.87493      | 49.9451 |

Totals : 810.62061 19.10362

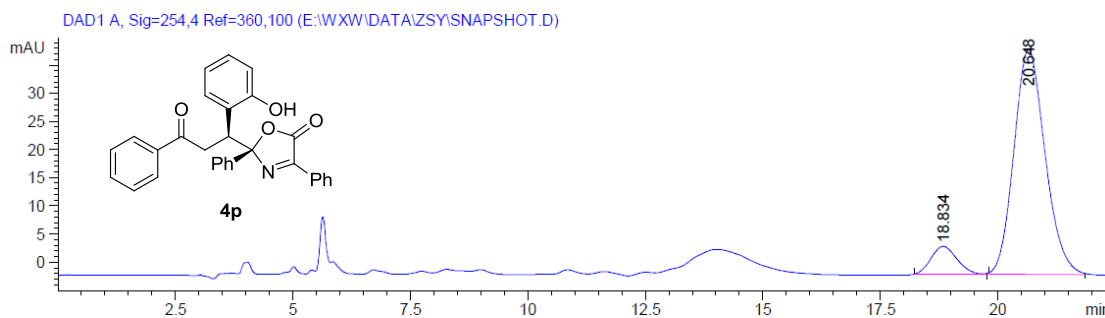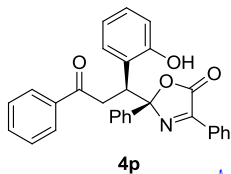

| Peak # | RetTime [min] | Type | Width [min] | Area [mAU*s] | Height [mAU] | Area %  |
|--------|---------------|------|-------------|--------------|--------------|---------|
| 1      | 18.834        | BB   | 0.5633      | 190.54471    | 4.94727      | 9.3940  |
| 2      | 20.648        | BB   | 0.7092      | 1837.82275   | 39.91592     | 90.6060 |

Totals : 2028.36746 44.86319

**(R)-2-((S)-3-(4-chlorophenyl)-1-(2-hydroxyphenyl)-3-oxopropyl)-2,4-diphenyloxazol-5(2H)-one 4q:**

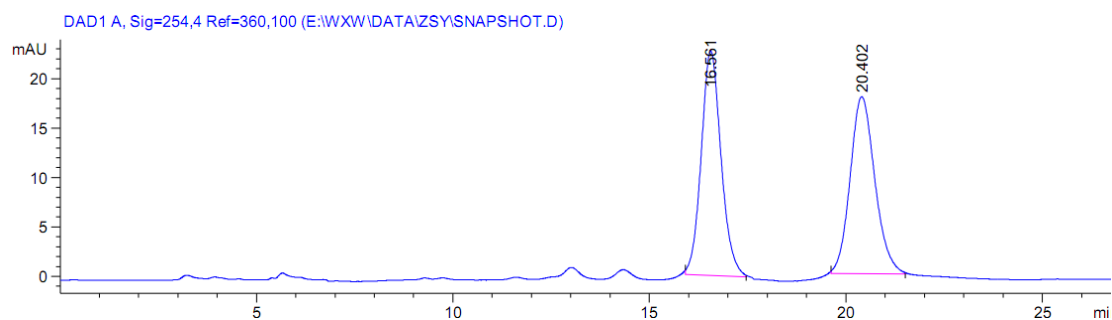

Signal 1: DAD1 A, Sig=254,4 Ref=360,100

| Peak # | RetTime [min] | Type | Width [min] | Area [mAU*s] | Height [mAU] | Area %  |
|--------|---------------|------|-------------|--------------|--------------|---------|
| 1      | 16.561        | BB   | 0.5352      | 797.14575    | 22.72779     | 50.4466 |
| 2      | 20.402        | BB   | 0.6643      | 783.03064    | 17.90201     | 49.5534 |

Totals : 1580.17639 40.62980

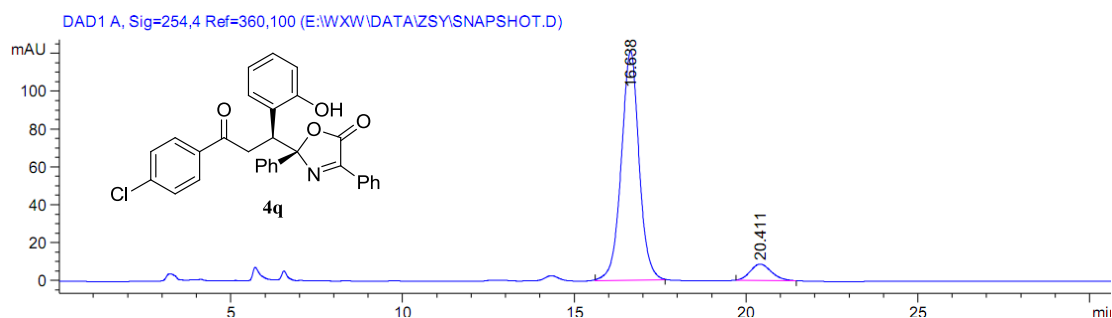

Signal 1: DAD1 A, Sig=254,4 Ref=360,100

| Peak # | RetTime [min] | Type | Width [min] | Area [mAU*s] | Height [mAU] | Area %  |
|--------|---------------|------|-------------|--------------|--------------|---------|
| 1      | 16.638        | BB   | 0.5482      | 4363.21729   | 121.13003    | 92.1681 |
| 2      | 20.411        | BB   | 0.6420      | 370.75818    | 8.68640      | 7.8319  |

Totals : 4733.97546 129.81643

**(R)-2-((S)-3-(4-bromophenyl)-1-(2-hydroxyphenyl)-3-oxopropyl)-2,4-diphenyloxazol-5(2H)-one 4r:**

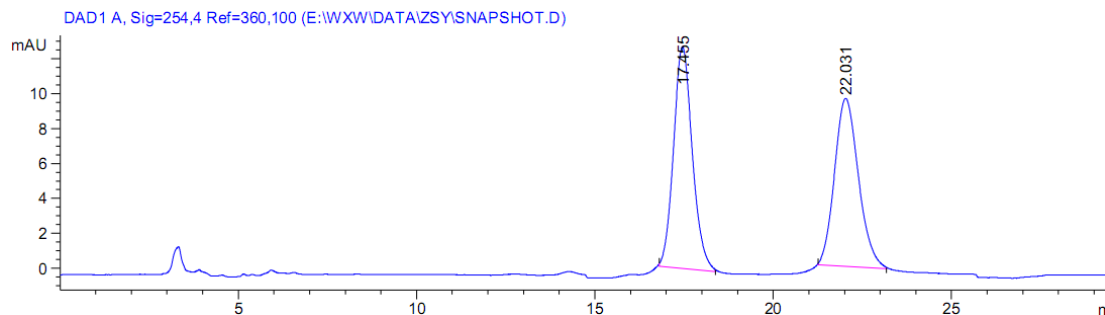

Signal 1: DAD1 A, Sig=254,4 Ref=360,100

| Peak # | RetTime [min] | Type | Width [min] | Area [mAU*s] | Height [mAU] | Area %  |
|--------|---------------|------|-------------|--------------|--------------|---------|
| 1      | 17.455        | BB   | 0.5562      | 464.09714    | 12.70448     | 50.8405 |
| 2      | 22.031        | BB   | 0.6996      | 448.75284    | 9.63178      | 49.1595 |

Totals : 912.84998 22.33625

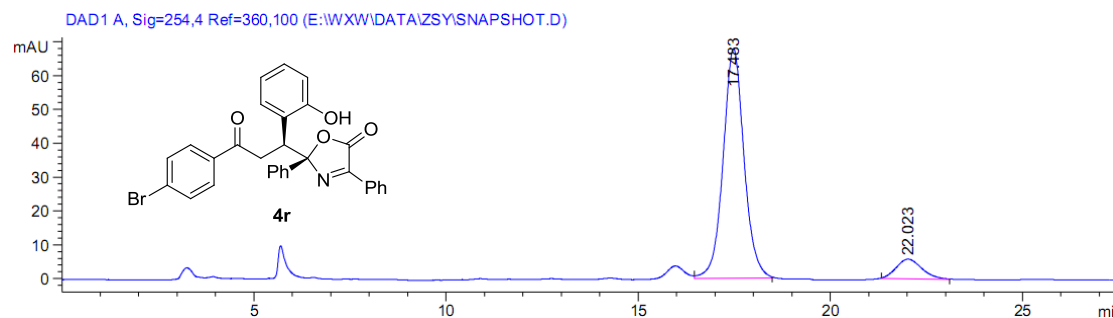

| Peak # | RetTime [min] | Type | Width [min] | Area [mAU*s] | Height [mAU] | Area %  |
|--------|---------------|------|-------------|--------------|--------------|---------|
| 1      | 17.483        | VB   | 0.5742      | 2572.49316   | 67.87194     | 90.6596 |
| 2      | 22.023        | BB   | 0.6823      | 265.03549    | 5.76581      | 9.3404  |

Totals : 2837.52866 73.63775

**(R)-2-((S)-1-(2-hydroxy-5-methylphenyl)-3-oxo-3-phenylpropyl)-2,4-diphenyloxazol-5(2H)-one 4s:**

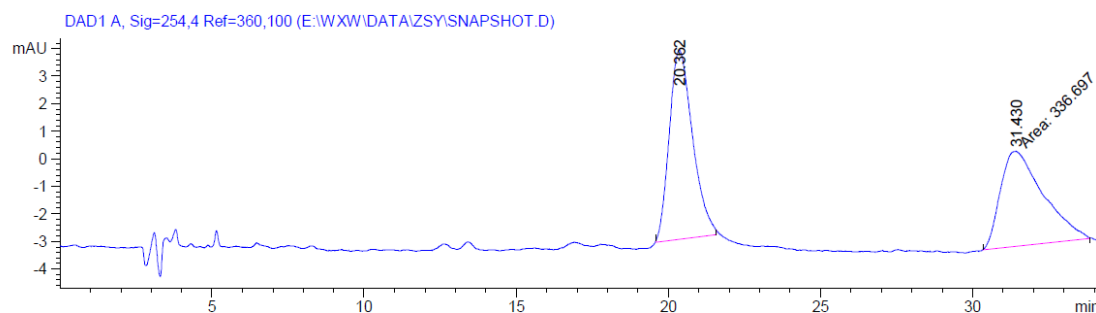



| Peak #   | RetTime [min] | Type | Width [min] | Area [mAU*s] | Height [mAU] | Area %  |
|----------|---------------|------|-------------|--------------|--------------|---------|
| 1        | 20.362        | BB   | 0.7562      | 365.21555    | 6.86967      | 52.0315 |
| 2        | 31.430        | MM   | 1.6225      | 336.69739    | 3.45866      | 47.9685 |
| Totals : |               |      |             | 701.91293    | 10.32833     |         |

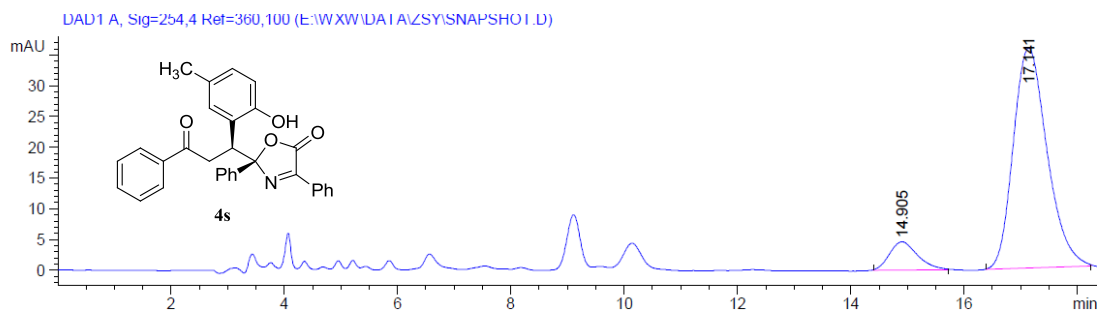

| Peak #   | RetTime [min] | Type | Width [min] | Area [mAU*s] | Height [mAU] | Area %  |
|----------|---------------|------|-------------|--------------|--------------|---------|
| 1        | 14.905        | BB   | 0.5207      | 160.82855    | 4.61386      | 9.7987  |
| 2        | 17.141        | BB   | 0.6415      | 1480.48987   | 35.72097     | 90.2013 |
| Totals : |               |      |             | 1641.31842   | 40.33484     |         |

**(R)-2-((S)-1-(2-hydroxy-3-methoxyphenyl)-3-oxo-3-phenylpropyl)-2,4-diphenyloxazol-5(2H)-one 4t:**

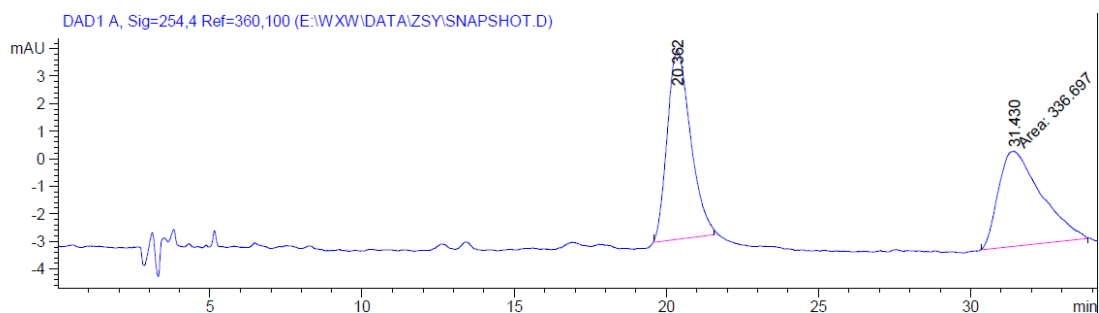

| Peak #   | RetTime [min] | Type | Width [min] | Area [mAU*s] | Height [mAU] | Area %  |
|----------|---------------|------|-------------|--------------|--------------|---------|
| 1        | 20.362        | BB   | 0.7562      | 365.21555    | 6.86967      | 52.0315 |
| 2        | 31.430        | MM   | 1.6225      | 336.69739    | 3.45866      | 47.9685 |
| Totals : |               |      |             | 701.91293    | 10.32833     |         |

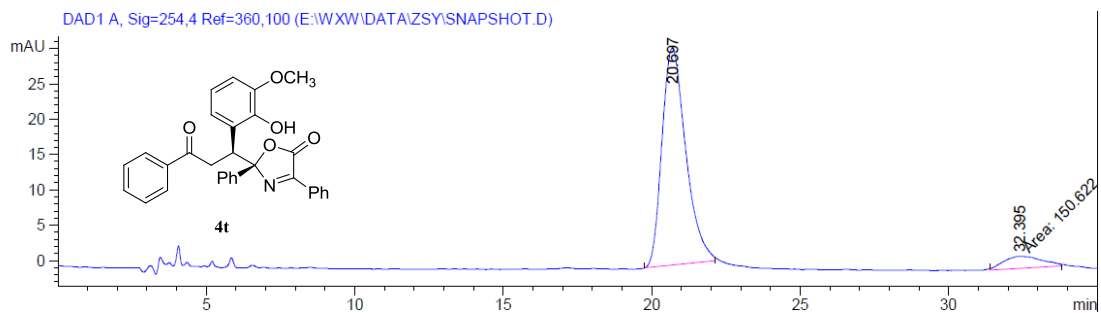

| Peak # | RetTime [min] | Type | Width [min] | Area [mAU*s] | Height [mAU] | Area %  |
|--------|---------------|------|-------------|--------------|--------------|---------|
| 1      | 20.697        | BB   | 0.8417      | 1708.51855   | 30.67898     | 91.8983 |
| 2      | 32.395        | MM   | 1.4689      | 150.62170    | 1.70907      | 8.1017  |

Totals : 1859.14026 32.38805

**(R)-2-((S)-1-(5-chloro-2-hydroxyphenyl)-3-oxo-3-phenylpropyl)-2-(4-fluorophenyl)-4-phenyl oxazol-5(2H)-one 4u:**

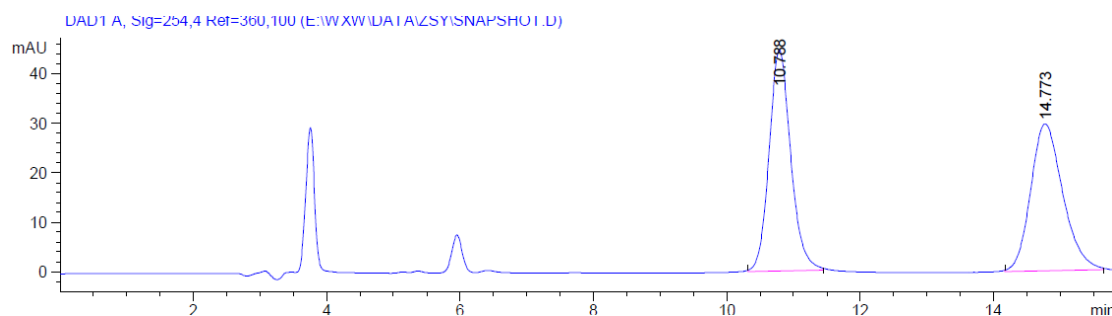

| Peak # | RetTime [min] | Type | Width [min] | Area [mAU*s] | Height [mAU] | Area %  |
|--------|---------------|------|-------------|--------------|--------------|---------|
| 1      | 10.788        | BB   | 0.3430      | 1008.60913   | 44.73605     | 50.3825 |
| 2      | 14.773        | BB   | 0.5121      | 993.29333    | 29.70720     | 49.6175 |

Totals : 2001.90247 74.44325

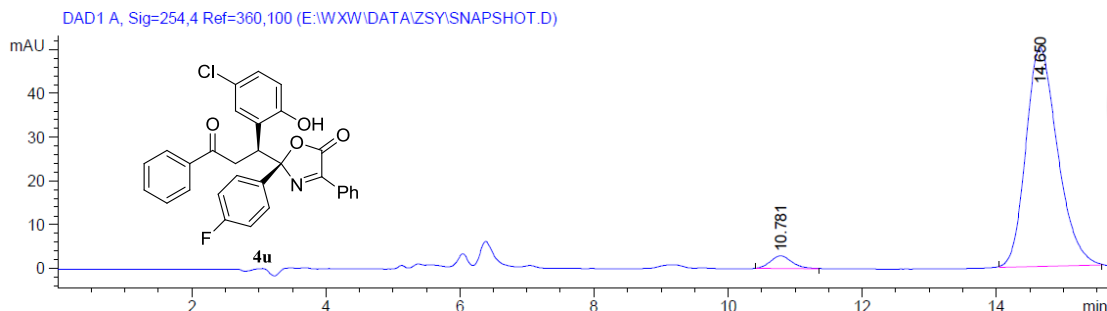

| Peak # | RetTime [min] | Type | Width [min] | Area [mAU*s] | Height [mAU] | Area %  |
|--------|---------------|------|-------------|--------------|--------------|---------|
| 1      | 10.781        | BB   | 0.3491      | 66.32739     | 2.94076      | 3.8704  |
| 2      | 14.650        | BB   | 0.5076      | 1647.37695   | 50.10408     | 96.1296 |

Totals : 1713.70435 53.04484

**(R)-2-((S)-1-(5-chloro-2-hydroxyphenyl)-3-oxo-3-phenylpropyl)-2-(4-chlorophenyl)-4-phenyl oxazol-5(2H)-one 4v:**

DAD1 A, Sig=254,4 Ref=360,100 (E:\WXW\DATA\ZSY\SNAPSHOT.D)

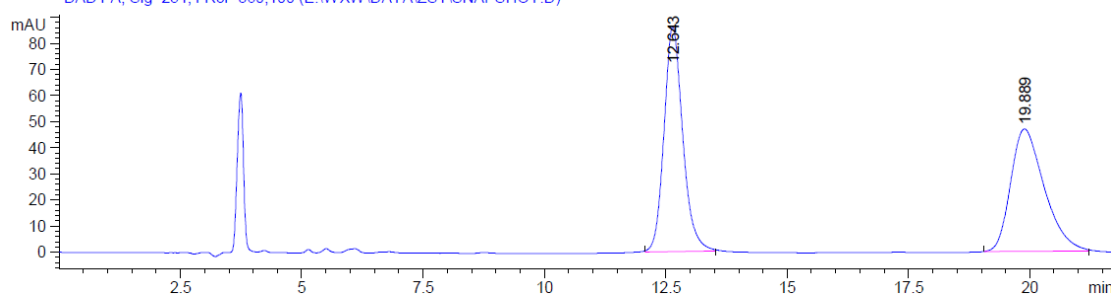

| Peak # | RetTime [min] | Type | Width [min] | Area [mAU*s] | Height [mAU] | Area %  |
|--------|---------------|------|-------------|--------------|--------------|---------|
| 1      | 12.643        | BB   | 0.4092      | 2311.32764   | 86.10265     | 50.6205 |
| 2      | 19.889        | BB   | 0.7348      | 2254.66162   | 46.90391     | 49.3795 |

Totals : 4565.98926 133.00656

DAD1 A, Sig=254,4 Ref=360,100 (E:\WXW\DATA\ZSY\SNAPSHOT.D)

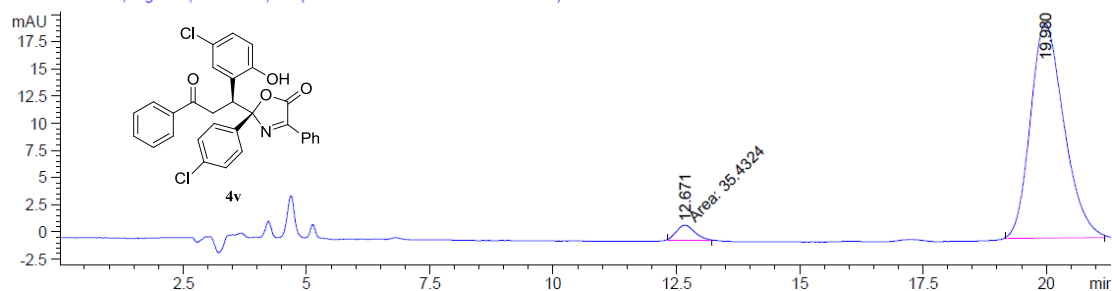

| Peak # | RetTime [min] | Type | Width [min] | Area [mAU*s] | Height [mAU] | Area %  |
|--------|---------------|------|-------------|--------------|--------------|---------|
| 1      | 12.671        | MM   | 0.4309      | 35.43245     | 1.37051      | 3.6571  |
| 2      | 19.980        | BB   | 0.7109      | 933.43420    | 19.76682     | 96.3429 |

Totals : 968.86665 21.13732

**(R)-2-((S)-1-(5-chloro-2-hydroxyphenyl)-3-oxo-3-phenylpropyl)-2-(4-methoxyphenyl)-4-phenyloxazol-5(2H)-one 4w:**

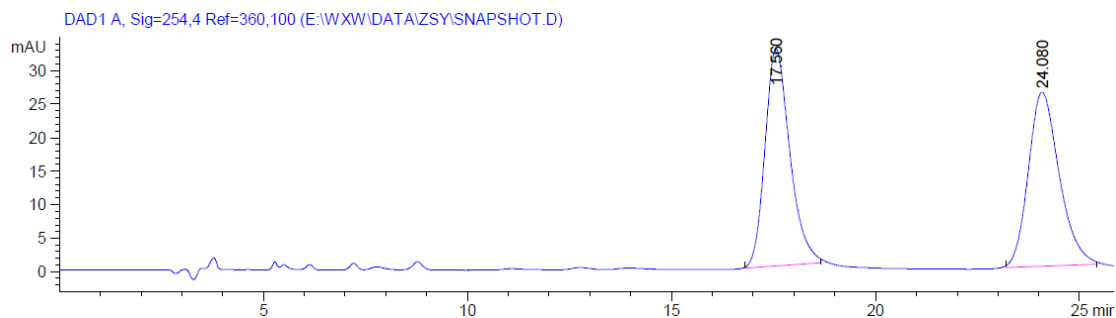

| Peak # | RetTime [min] | Type | Width [min] | Area [mAU*s] | Height [mAU] | Area %  |
|--------|---------------|------|-------------|--------------|--------------|---------|
| 1      | 17.560        | BB   | 0.6477      | 1370.44861   | 32.38824     | 50.1658 |
| 2      | 24.080        | BB   | 0.7841      | 1361.38745   | 25.94932     | 49.8342 |

Totals : 2731.83606 58.33756

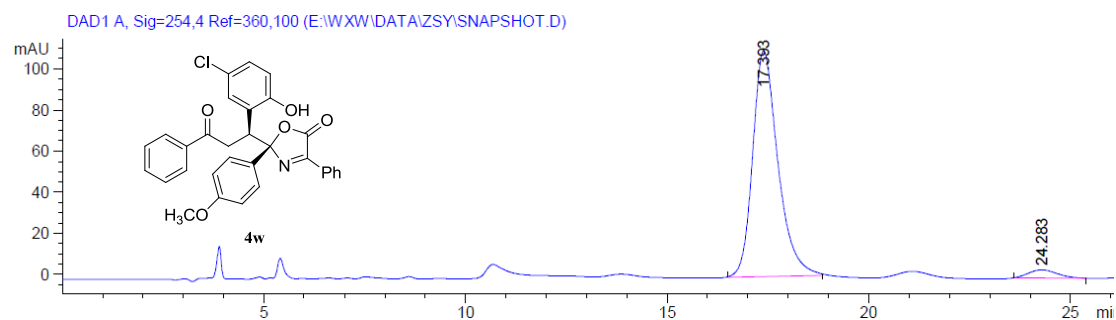

| Peak # | RetTime [min] | Type | Width [min] | Area [mAU*s] | Height [mAU] | Area %  |
|--------|---------------|------|-------------|--------------|--------------|---------|
| 1      | 17.393        | BB   | 0.6546      | 4787.62793   | 109.82763    | 95.9939 |
| 2      | 24.283        | BB   | 0.6560      | 199.79886    | 3.95105      | 4.0061  |

Totals : 4987.42679 113.77868

**(R)-2-((S)-1-(5-chloro-2-hydroxyphenyl)-3-oxo-3-phenylpropyl)-4-phenyl-2-(p-tolyl)oxazol-5(2H)-one 4x:**

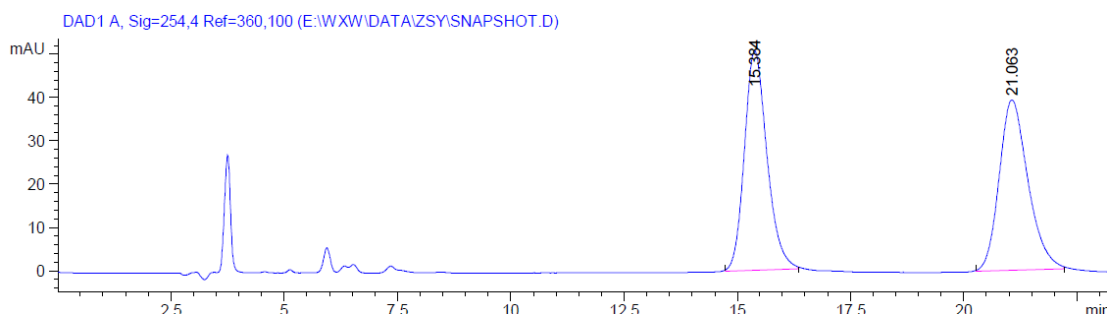

| Peak #   | RetTime [min] | Type | Width [min] | Area [mAU*s] | Height [mAU] | Area %  |
|----------|---------------|------|-------------|--------------|--------------|---------|
| 1        | 15.384        | BB   | 0.5283      | 1762.74756   | 50.86429     | 50.2966 |
| 2        | 21.063        | BB   | 0.6734      | 1741.95825   | 39.43139     | 49.7034 |
| Totals : |               |      |             | 3504.70581   | 90.29568     |         |

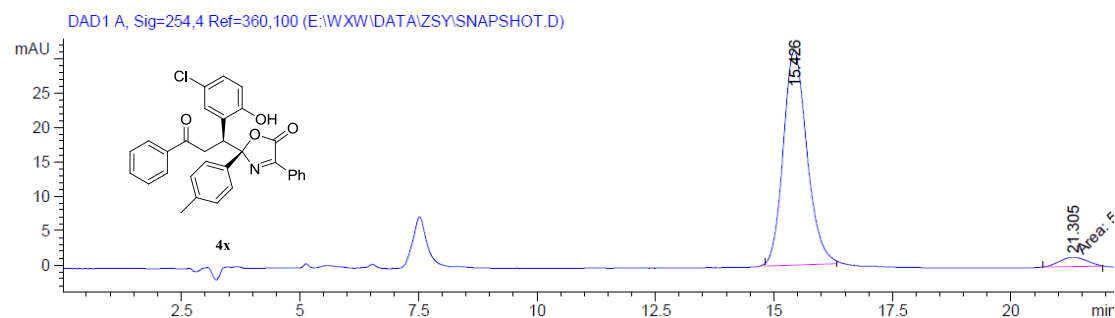

| Peak #   | RetTime [min] | Type | Width [min] | Area [mAU*s] | Height [mAU] | Area %  |
|----------|---------------|------|-------------|--------------|--------------|---------|
| 1        | 15.426        | BB   | 0.5274      | 1082.51367   | 31.15401     | 95.1902 |
| 2        | 21.305        | MM   | 0.6720      | 54.69764     | 1.35649      | 4.8098  |
| Totals : |               |      |             | 1137.21132   | 32.51050     |         |

**(R)-2-((S)-1-(5-chloro-2-hydroxyphenyl)-3-oxo-3-phenylpropyl)-4-phenyl-2-(m-tolyl)oxazol-5(2H)-one 4y:**

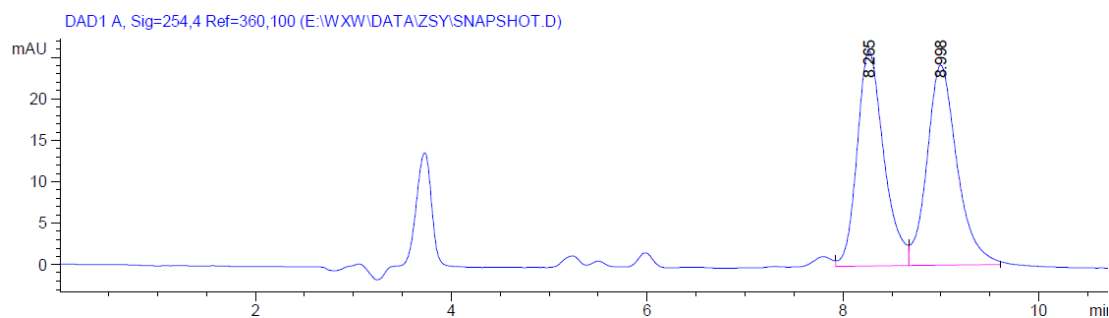

| Peak #   | RetTime [min] | Type | Width [min] | Area [mAU*s] | Height [mAU] | Area %  |
|----------|---------------|------|-------------|--------------|--------------|---------|
| 1        | 8.265         | VV   | 0.2871      | 492.73190    | 26.00286     | 48.8232 |
| 2        | 8.998         | VB   | 0.3215      | 516.48523    | 24.15354     | 51.1768 |
| Totals : |               |      |             | 1009.21713   | 50.15641     |         |

DAD1 A, Sig=254,4 Ref=360,100 (E:\WXW\DATA\ZSY\SNAPSHOT.D)

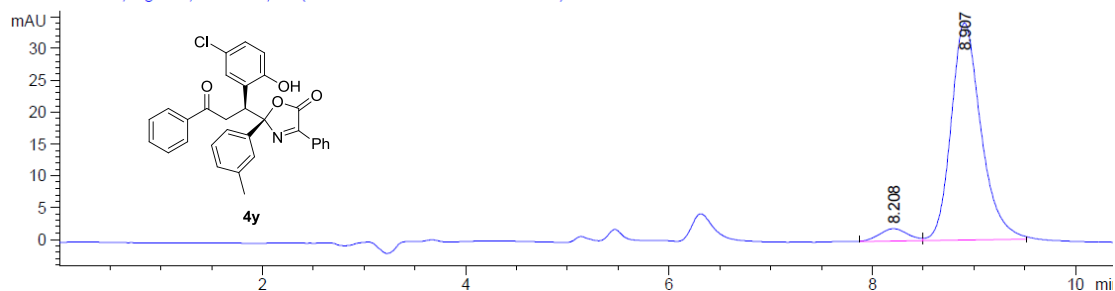

| Peak # | RetTime [min] | Type | Width [min] | Area [mAU*s] | Height [mAU] | Area %  |
|--------|---------------|------|-------------|--------------|--------------|---------|
| 1      | 8.208         | BV   | 0.2865      | 36.46616     | 1.92953      | 4.9785  |
| 2      | 8.907         | VB   | 0.3080      | 696.01282    | 34.11446     | 95.0215 |

Totals : 732.47898 36.04399

**(R)-2-(tert-butyl)-2-((S)-1-(5-chloro-2-hydroxyphenyl)-3-oxo-3-phenylpropyl)-4-phenyloxazo  
l-5(2H)-one 4z:**

DAD1 A, Sig=254,4 Ref=360,100 (E:\WXW\DATA\ZSY\SNAPSHOT.D)

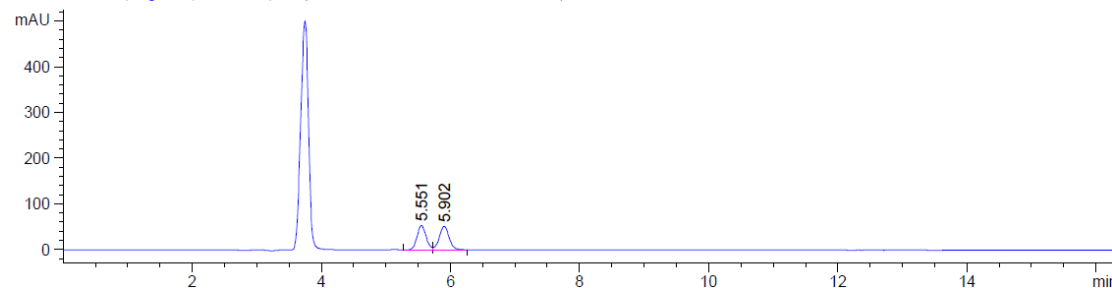

| Peak # | RetTime [min] | Type | Width [min] | Area [mAU*s] | Height [mAU] | Area %  |
|--------|---------------|------|-------------|--------------|--------------|---------|
| 1      | 5.551         | VV   | 0.1512      | 530.14221    | 53.67393     | 48.8868 |
| 2      | 5.902         | VB   | 0.1624      | 554.28534    | 51.97208     | 51.1132 |

Totals : 1084.42755 105.64601

DAD1 A, Sig=254,4 Ref=360,100 (E:\WXW\DATA\ZSY\SNAPSHOT.D)

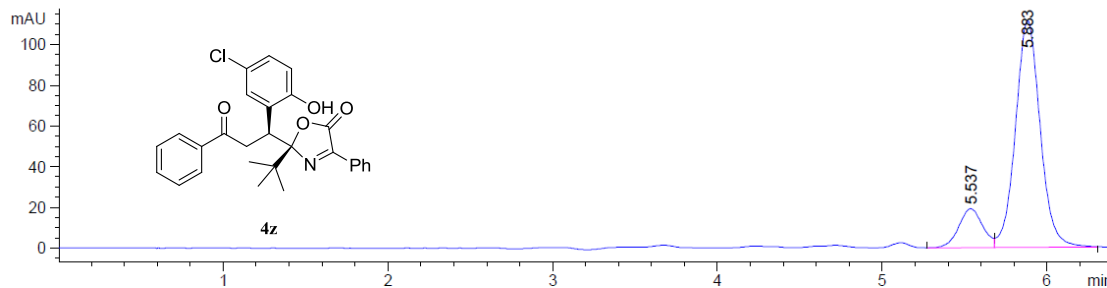

| Peak #   | RetTime [min] | Type | Width [min] | Area [mAU*s] | Height [mAU] | Area %  |
|----------|---------------|------|-------------|--------------|--------------|---------|
| 1        | 5.537         | VV   | 0.1559      | 193.25290    | 19.12744     | 14.3013 |
| 2        | 5.883         | VB   | 0.1594      | 1158.04004   | 111.30754    | 85.6987 |
| Totals : |               |      |             | 1351.29294   | 130.43498    |         |
